# Supplementary material
Source: publisher figshare collection journal article supplement (https://tandf.figshare.com/articles/dataset/_/17414015)
Supplement: Supplementary file 1 [file 1]

# **CORTE CONSTITUCIONAL DEL ECUADOR**

**CASO NO. 1149-19-JP**

## **AMICUS CURIAE**

### **LOS DERECHOS DEL BOSQUE PROTECTOR LOS CEDROS, SUS RÍOS Y ECOSISTEMA**

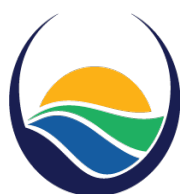

**earth**  
**LAW CENTER**

**EARTH LAW CENTER**

249 East 118th Street, Suite 3B

New York, NY 10035 (USA)

[cpfigelist@earthlaw.org](mailto:cpfigelist@earthlaw.org)

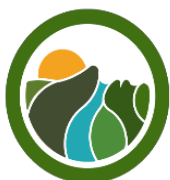

**GARN**  
GLOBAL ALLIANCE FOR  
THE RIGHTS OF NATURE

**Global Alliance for the Rights of Nature**

[www.therightsofnature.org](http://www.therightsofnature.org)

[organizer@therightsofnature.org](mailto:organizer@therightsofnature.org)

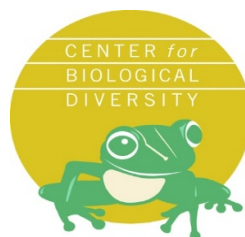

**Center for Biological Diversity**

[www.biologicaldiversity.org](http://www.biologicaldiversity.org)

[AOlivera@biologicaldiversity.org](mailto:AOlivera@biologicaldiversity.org)

*Organizaciones colaboradoras:*

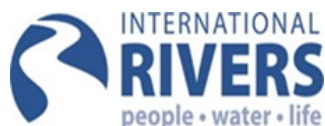

**International Rivers**

2054 University Ave #300

Berkeley, CA 94704 (USA)

[monti@internationalrivers.org](mailto:monti@internationalrivers.org)

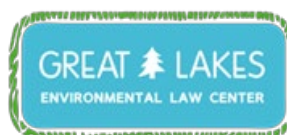

**Great Lakes Environmental Law Center**

Green Garage, 4444 2nd Ave

Detroit, MI 48201 (USA)

[nhall@wayne.edu](mailto:nhall@wayne.edu)

**4 DE SEPTIEMBRE DE 2020**

## 1. ASPECTOS PRELIMINARES

- 1.1 Carla Cárdenas, Sara Lorenzini, Andrea Folds, Vanessa Schaeffer, Constanza Prieto Figelist y Grant Wilson todos integrantes de la organización no gubernamental Earth Law Center, identificados como aparece al pie de nuestras firmas, por medio del presente escrito nos permitimos presentar respetuosamente el siguiente *Amicus Curiae*, en apoyo de las pretensiones de la acción de protección, presentada por Harold Burbano, en su calidad de Director Tutelar de la Defensoría del Pueblo y Otros, ante la Honorable Corte Constitucional del Ecuador, identificada como 1149-19-JP.
- 1.2 Earth Law Center una organización no gubernamental, con sede en los Estados Unidos de Norteamérica, que promueve la aplicación de los derechos de la naturaleza a nivel local e internacional, creando alianzas con organizaciones locales para el reconocimiento y la promulgación de leyes que reconozcan los derechos inherentes de los ríos, océanos y ecosistemas costeros y terrestres. Así, busca hacer un cambio de paradigma, luchando por el reconocimiento formal de los derechos de la naturaleza a existir, prosperar y evolucionar. Earth Law Center busca otorgar a los ecosistemas los mismos derechos que se le reconocen a las personas y a las corporaciones, permitiéndole la defensa de sus derechos ante las cortes nacionales e internacionales, no solo en beneficio de las personas sino por la naturaleza en sí misma.
- 1.3 La Alianza Global por los Derechos de la Naturaleza (GARN) es una dinámica y diversa red global de organizaciones, comunidades e individuos comprometidos con la adopción e implementación universal de sistemas legales que reconocen, respetan y hacen cumplir los "Derechos de la Naturaleza" y promoviendo la transformación de como los seres humanos se relacionan con la Madre Tierra. Los miembros de GARN son una red de organizaciones, de científicos, abogados, economistas, líderes indígenas, autores, líderes espirituales, políticos, actores, líderes empresariales, amas de casa, estudiantes y activistas de más de 100 países, de seis continentes de América del Norte y del Sur, África, Europa, Asia y Australia, que buscan transformar la relación humana con el planeta. Ofrecen una red de aliados y expertos y de apoyo para las comunidades, los gobiernos y otras personas que promueven el pensamiento basado en los derechos de la tierra, las acciones comunitarias y los sistemas legales. GRAN ha cumplido un rol importante en el crecimiento del movimiento global por los Derechos de la Naturaleza al ofrecer educación, involucramiento, y apoyo legal para desarrollar Jurisprudencia de la Tierra a través de Tribunales Internacionales de los Derechos de la Naturaleza de muy alto nivel
- 1.4 El Centro para la Diversidad Biológica ("el Centro") es una organización sin fines de lucro con más de 1.7 millones de miembros y constituyentes. El Centro tiene su sede en Estados Unidos y oficinas en Estados Unidos y México. Durante dos décadas, el Centro y sus miembros han trabajado para asegurar la protección de las especies en peligro y su hábitat bajo leyes estatales, federales y tratados internacionales debido al creciente número de amenazas a la biodiversidad, como los problemas globales del cambio climático, destrucción del hábitat y el comercio de vida silvestre. El Centro cree que la salud y el vigor de las sociedades humanas y la integridad y la naturaleza salvaje del entorno natural están estrechamente vinculados. El Centro también ha trabajado intensamente para prevenir actividades destructivas como la minería comercial en hábitats sensibles e importantes.

- 1.5 International Rivers se dedica desde 1985 a la protección de ríos y a la defensa de los derechos de las comunidades que dependen de ellos. Trabajamos para detener proyectos destructivos en los ríos y promover soluciones energéticas y de provisión de agua para un planeta sostenible. Los ríos son vitales para sostener toda la vida en la tierra. Buscamos un mundo donde los ríos saludables y los derechos de las comunidades locales sean valorados y protegidos. Visualizamos un mundo donde las necesidades de agua y energía se satisfacen sin degradar la naturaleza o aumentar la pobreza, y donde las personas tienen derecho a participar en las decisiones que afectan sus vidas.
- 1.6 The Great Lakes Environmental Center es una organización no gubernamental basada en Detroit, Estados Unidos, que ofrece a la comunidad educación, apoyo legal y jurídico en problemáticas medioambientales. Además, de ofrecer diversos servicios jurídicos, desarrollo de normativo y en temáticas medioambientales relacionados con los recursos naturales y energía que afectan a las comunidades en y los alrededores de Detroit, en todo Michigan y la región de los grandes lagos.
- 1.7 Las organizaciones fundan su intervención Amigos de la Corte, ante la Honorable Corte Constitucional del Ecuador, en el Principio 10 de la Declaración de Río de Janeiro sobre Medio Ambiente y Desarrollo de 1992 que garantiza el acceso efectivo de los ciudadanos a los procedimientos judiciales y administrativos. Asimismo, en la Constitución de la República del Ecuador, artículos 397 numeral 1 (consagración del principio de acceso a la justicia), 71 (exigibilidad de los derechos de la naturaleza), 426 (principio de supremacía constitucional), así como en los artículos 8.3 (tutela efectiva del derecho a vivir en un ambiente sano), 8.4 (participación ciudadana) y 6 (acceso a la información, participación y justicia en materia ambiental) del Código Orgánico Ambiental.
- 1.8 Las organizaciones consideran necesario manifestar a esta Honorable Corte que este caso es emblemático no solo para Ecuador, sino también para la comunidad internacional, que progresivamente están adhiriéndose a esta innovativa manera de proteger los derechos de la naturaleza. Ecuador, de este modo, está siendo observado como un ejemplo y pionero en la materia. Ecuador puede dar el siguiente paso, a través de esta sentencia, demostrando al mundo que políticas, decisiones, proyectos, actos administrativos deben realizarse en el marco del respeto de los derechos de la naturaleza y del derecho internacional medioambiental y del derecho internacional de los derechos humanos.
- 1.9 Las organizaciones interponen ante la Honorable Corte Constitucional del Ecuador este *amicus curiae* con el objetivo de solicitar respetuosamente que: a) Se proteja y garantice la vigencia efectiva de los derechos de la naturaleza; b) se reconozca y se establezca mecanismo para garantizar y respetar los derechos fundamentales del Bosque protector de Los Cedros, específicamente derecho a existir, mantener y regenerar sus ciclos vitales, estructura y procesos evolutivos; c) se reconozca y se establezca mecanismo para garantizar y respetar los derechos fundamentales de los ríos del río Manduriacu, el río Verde y el río los Cedros, río Magdalena a específicamente sus derechos: (1) El derecho al flujo, (2) El derecho a ejercer sus funciones esenciales con el ecosistema, (3) El derecho a estar libre de toda contaminación, (4) El derecho a alimentar y ser alimentado por sus afluentes, (5) El derecho a biodiversidad nativa, y (6) El derecho a la restauración; d) Se garantice la aplicación del principio de precaución al momento de otorgar autorizaciones en bosques protectores; e) Se garantice el derecho de la ciudadanía a ser consultados;

y g) se nombre guardianes y representantes del Bosque Protector Los Cedros y sus respectivos ríos.

## **2. EL VALOR INTRÍNSECO DEL BOSQUE PROTECTOR LOS CEDROS**

### **I. IMPORTANCIA DE LOS BOSQUES COMO ECOSISTEMA QUE ALBERGA A OTRAS ESPECIES Y PROVEEN DE SERVICIOS AMBIENTALES INCLUIDO EL AGUA**

- 2.1 Los Bosques en general son ecosistemas de extrema importancia por las funciones esenciales que ejerce respecto otras entidades naturales, como también respecto de los beneficios que generan para la humanidad. El bosque los Cedros es un bosque que ha sido calificado como un bosque primario.
- 2.2 Un ecosistema forestal es el “hogar” de varias especies de nuestra biodiversidad, son la fuente de servicios ambientales y necesitan ser considerados una estructura de elementos que alberga a otras. De hecho, Un ecosistema forestal es la unidad ecológica básica en un bosque en particular que existe como "hogar" para una comunidad de organismos clasificados tanto nativos como introducidos. Un ecosistema forestal recibe su nombre de las especies de árboles primarios que forman el dosel. Está definido por todos los habitantes vivos colectivos de ese ecosistema forestal que coexisten juntos en simbiosis para crear una ecología única. El Bosque Protector Los Cedros alberga a varias especies amenazadas como son el oso andino, el mono araña y varias especies de aves.
- 2.3 La Constitución del Ecuador reconoce a la biodiversidad como un elemento de protección estratégico y obliga al estado a administrarlo de conformidad con los principios de sostenibilidad, precaución, prevención y eficiencia. Así lo estipula el artículo 13 de la Constitución cuando establece:

“El Estado se reserva el derecho de administrar, regular, controlar y gestionar los sectores estratégicos, de conformidad con los principios de sostenibilidad ambiental, precaución, prevención y eficiencia.

Los sectores estratégicos, de decisión y control exclusivo del Estado, son aquellos que por su trascendencia y magnitud tienen decisiva influencia económica, social, política o ambiental, y deberán orientarse al pleno desarrollo de los derechos y al interés social.

Se consideran sectores estratégicos la energía en todas sus formas, las telecomunicaciones, los recursos naturales no renovables, el transporte y la refinación de hidrocarburos, la biodiversidad y el patrimonio genético, el espectro radioeléctrico, el agua, y los demás que determine la ley.”

- 2.4 Los bosques, por lo tanto, son entidades de protección estratégica, merecedoras de protección en sí misma, pues son el hábitat por excelencia de una enorme variedad de biodiversidad, albergan patrimonio genético y son importantes para la regulación

del ciclo hidrológico y provisión de agua a las comunidades aledañas y a varias cuencas hidrográficas de la zona. Los bosques proveen varios servicios ambientales que son importantes para los seres humanos también. Así lo reconoce la Ley Forestal (anterior al Código Orgánico del Ambiente) que manifiesta en su artículo 6 que los requerimientos para una declaratoria de un bosque protector son:

- “a) Tener como función principal la conservación del suelo y la vida silvestre;
- b) Estar situados en áreas que permitan controlar fenómenos pluviales torrenciales o la preservación de cuencas hidrográficas, especialmente en las zonas de escasa precipitación pluvial;
- c) Ocupar cejas de montaña o áreas contiguas a las fuentes, corrientes o depósitos de agua;
- d) Constituir cortinas rompevientos o de protección del equilibrio del medio ambiente;
- e) Hallarse en áreas de investigación hidrológico - forestal;
- f) Estar localizados en zonas estratégicas para la defensa nacional; y,
- g) Constituir factor de defensa de los recursos naturales y de obras de infraestructura de interés público”.

- 2.5 El Bosque Protector Los Cedros cumple con algunas de estas funciones ecológicas que son importantes para la vida, como es el proteger y regular los ciclos hidrológicos, preserva la cuenca hidrográfica, protege a la población de deslaves por estar en una ceja de montaña. Protege la biodiversidad, la vida de animales, de flora y brinda servicios ambientales importantes a la población aledaña.
- 2.6 Los Bosques protectores, si bien no son parte del Sistema Nacional de Áreas Protegidas como lo ha señalado el Ministerio del Ambiente, son un ecosistema legalmente protegido que también es parte de la Estrategia para Proteger las áreas del Sistema Nacional de Áreas Protegidas. Por eso el Bosque Protector Los Cedros colinda y es parte del área de amortiguamiento de la Reserva Ecológica Cotacachi Cayapas, lo que implica que este (y otros bosques protectores) detiene las amenazas que sobre el área protegida existe. Por ejemplo, los Bosques Protectores reducen la posibilidad de invasiones, de incendios y de ingreso de actividades extractivas y de tala de árboles.
- 2.7 Asimismo, el reconocimiento de los derechos de la naturaleza, como lo ha hecho la Constitución Política de la República de Ecuador, reconoce el valor en sí mismo de todos los bosques y otras entidades naturales. Este modelo ecocéntrico, de carácter constitucional y de jerarquía superior a toda otra norma legislativa permite corregir los vacíos en nuestras estructuras legales que permiten a los actores miopes abusar de los sistemas naturales del mundo para obtener un beneficio rápido. Asimismo, el enfoque de Derechos de la Naturaleza promueve la idea de que los humanos, al igual que todo lo demás que vive en la Tierra, deben respetar los sistemas de la Tierra.
- 2.8 El Bosque Protector Los Cedros es un excelente ejemplo de un hábitat sensible, importante y rico en biodiversidad que merece la máxima protección. En una carta

fechada en agosto del 2020 al gobierno ecuatoriano, algunos científicos, de los más prominentes del mundo, incluidos Jane Goodall, EO Wilson, Peter Raven y Rosemary y Peter Grant, junto con más de 1200 científicos de todo el mundo, solicitaron el cese de las actividades mineras en Los Cedros y otros Bosques Protectores de Ecuador. Los firmantes señalaron que Los Cedros alberga 207 especies diferentes de plantas y animales que están incluidas en la Lista Roja de Ecuador, incluidas 5 especies en peligro crítico, 29 en peligro, 70 casi amenazadas y 103 vulnerables a la extinción. Ver Anexo [1 ]. Estas especies incluyen el mono araña de cabeza marrón (que se describe más adelante), el oso andino, el jaguar, la oncilla, una increíble diversidad de aves, ranas de lluvia y orquídeas que no se encuentran en ningún otro lugar de la Tierra<sup>1</sup>. Los científicos expresaron gran preocupación por los impactos de la minería en la excepcional biodiversidad de los Bosques Protectores de Ecuador, y solicitaron específicamente que todas las concesiones mineras se eliminen de los Bosques Protectores, incluido Los Cedros. También solicitaron que Los Cedros sean incluidos en la Reserva Ecológica Cotacachi-Cayapas, con la que comparte frontera.

- 2.9 El Dr. Mika Peck, profesor titular de Biología (Evolución, Comportamiento y Medio Ambiente) de la Universidad de Sussex, ha presentado pruebas sobre el mono araña de cabeza marrón, en peligro crítico, que habita Los Cedros, y la importancia de la especie para el ecosistema. Ver Anexo [2 ]. Este mono araña ha perdido más del 80% de su área de distribución original y, en 2005, quedaban menos de 250 monos araña de cabeza marrón en todo el mundo. Como explica el Dr. Peck, el mono araña de cabeza marrón es una especie "paraguas", una especie "indicadora" y un "ingeniero de ecosistemas", ya que mantiene la increíble diversidad de árboles de Los Cedros (probablemente más de 500 especies de árboles pueden ser encontrados en Los Cedros) mediante la dispersión de semillas. El mono necesita grandes áreas de bosque antiguo intacto para sobrevivir y está amenazado por la tala, el comercio ilegal, la caza, cambio climático y minería. Esta es solo una de los cientos de especies únicas y vulnerables amenazadas por la minería exploratoria en Los Cedros.
- 2.10 David F. Díaz Fernández, el Punto Focal Corregional de KBA para América Latina y el Caribe, ha presentado evidencia sobre el estado del Bosque Protector Los Cedros como un Área Clave de Biodiversidad (ACB o KBA por sus siglas en inglés) global. Ver Anexo [3]. Los Cedros ha sido reconocida como ACB global desde 2015. Esta designación se basó en la confirmación de Los Cedros como Área de Importancia para la Conservación de las Aves y la Biodiversidad (IBA) por BirdLife International en 2005, en base a la presencia de poblaciones de especies de aves amenazadas y especies de aves con distribuciones restringidas. El estado como Área Clave para la Biodiversidad se extiende más allá de las especies de aves, toda vez que se sabe que Los Cedros alberga al menos 54 especies en peligro de extinción a nivel mundial y más de 140 especies con áreas de distribución restringidas según la Unión Internacional para la Conservación de la Naturaleza (UICN). Esto incluye 18 especies de anfibios y plantas, incluidas 11 especies de orquídeas que solo se conocen en Los Cedros, que cumplen con el criterio A (biodiversidad amenazada globalmente) y el criterio B (biodiversidad geográficamente restringida) de los estándares de ACB. La importancia de Los Cedros para la persistencia global de la biodiversidad es clara.

---

<sup>1</sup> Roy, B.A., Zorrilla, M., Endara, L., Thomas, D.C., Vandegrift, R., Rubenstein, J.M., Policha, T., Rios-Touma, B. and Read, M., 2018. New mining concessions could severely decrease biodiversity and ecosystem services in Ecuador. *Tropical Conservation Science*, 11, p.1940082918780427.

## **II. EL ROL DE LOS BOSQUES EN LA MITIGACIÓN DEL CAMBIO CLIMÁTICO**

- 2.11 La destrucción de los bosques, por otra parte, libera en la atmósfera unos seis mil millones de toneladas de bióxido de carbono al año, y para el equilibrio de este elemento, así como para la conservación del medio ambiente, es importante evitar que escape este carbono almacenado en los ecosistemas forestales, explica la FAO<sup>2</sup>. Los árboles y los bosques ayudan a mitigar estos cambios al absorber el bióxido de carbono de la atmósfera y convertirlo, a través de la fotosíntesis, en carbono que "almacenan" en forma de madera y vegetación. Este proceso se denomina "fijación del carbono".
- 2.12 La mitigación de los efectos del cambio climático debido a la deforestación es un aspecto recogido en la Constitución de la República de Ecuador cuando le ordena al Estado adoptar medidas para ello en el art 414 en que establece: “El Estado adoptará medidas adecuadas y transversales para la mitigación del cambio climático, mediante la limitación de las emisiones de gases de efecto invernadero, de la deforestación y de la contaminación atmosférica; tomará medidas para la conservación de los bosques y la vegetación, y protegerá a la población en riesgo.”
- 2.13 En los árboles, el carbono supone en general alrededor del 20 por ciento de su peso. Además de los árboles, el conjunto de la biomasa forestal también funciona como "sumidero de carbono". Por ejemplo, la materia orgánica del suelo de los bosques - como el humus producido por la descomposición. El Marco de Referencia del Ecuador presentado por el Ecuador a la, Convención Marco de las Naciones Unidas sobre Cambio Climática [ CMNUCC] manifiesta que:

“La superficie de bosques nativos para el 2014 era de 12,753.387 hectáreas, de las cuales el mayor porcentaje, 74%, se encuentra en la región amazónica. Estos bosques contienen una parte considerable de la megabiodiversidad del país y son la fuente de bienes y servicios ambientales indispensables para el Buen Vivir. Desempeñan, además, una función importante en la mitigación del cambio climático al actuar como sumideros que absorben el carbono de la atmósfera y almacenarlo en la biomasa y los suelos. Además, los ecosistemas boscosos representan para las comunidades, pueblos y nacionalidades del país un valor intrínseco, cultural y espiritual. Paralelamente, los bosques almacenan carbono, el cual puede ser liberado por la deforestación lo que resulta en emisiones de GEI. La deforestación y la degradación de los bosques representan del 10% al 20% de las emisiones globales de GEI (IPCC 2014). La deforestación en Ecuador conlleva una notable merma de biodiversidad, reservas de agua y servicios ambientales; además de las emisiones de GEI. Entre 1990 y 2014 se perdieron cerca de 2,2 millones de hectáreas de bosque natural en el país. La cobertura

---

<sup>2</sup> Véase <http://www.fao.org/newsroom/es/focus/2006/1000247/index.html>

de bosque nativo disminuyó de 14.587,771 de hectáreas en 1990 a 12.753,387 de hectáreas en 2014. La deforestación bruta anual promedio en el período 1990-2000 fue de 129.943 hectáreas por año. Para el período 2000- 2008 fue de 108.650 hectáreas por año. Y para el último período, 2008-2014, fue de 97.917 hectáreas anuales, lo que representa una tendencia a la baja de la tasa de deforestación bruta.”

2.14 Adicionalmente, citamos el Acuerdo Ministerial No. 116 de fecha 7 de noviembre que plantea metas importantes para el país y que se deben cumplir con el apoyo de todas las instituciones:<sup>3</sup>

- Reducción de emisiones brutas de al menos 20% al 2025, a partir de Nivel de Referencia de Emisiones Forestales por Deforestación 2000-2008.
- Al 2025, las políticas, medidas y acciones de este plan contribuirán a reducir la tasa neta de deforestación.

2.15 Si la minería continúa devastando los bosques, provocando la deforestación, estas metas del país y no se cumplirán y habremos acabado con la más valiosa fuente de servicios ambientales y mitigación de los gases de efecto invernadero. El alcance de estas metas depende de todas las instituciones del país alienadas en un solo objetivo, detener la deforestación.

### **III. LA MINERÍA EN LOS BOSQUES DE LA REPÚBLICA DE ECUADOR**

2.16 Earth Law Center desea manifestar su preocupación, pues la situación del Bosque Protector Los Cedros, no es un hecho aislado en el Ecuador. Este es un problema de los bosques en todo el país. En los últimos años se vienen adjudicando concesiones mineras que traslapan con Bosques Protectores, con Bosques que están bajo el programa Socio Bosque, con Bosques en los territorios indígenas, ante la omisión de las autoridades de su obligación no solo constitucional de garantizar los derechos de la naturaleza, sino su obligación internacional de garantizar el derecho a un ambiente sano.

2.17 La minería es el peor motor de deforestación y destructor de los bosques. Este hecho ha sido alertado en estudios científicos y varios países que sufren de la misma situación. Por ejemplo, en Perú la minería es la principal causa de deforestación, ha triplicado la deforestación en los últimos cinco años. Según Ricardo Marapi en el artículo: “La deforestación de los bosques: un proceso indetenible”, manifiesta que la deforestación en la región Madre de Dios: en 2008, la tasa de deforestación anual era de poco más de 2 mil hectáreas, cantidad que aumentó considerablemente a más de 6 mil hectáreas en 2012<sup>4</sup>.

---

<sup>4</sup> Marpi Ricardo, La deforestación de los bosques: un proceso indetenible. Disponible en <http://www.larevistaagraria.org/sites/default/files/revista/LRA157/La%20deforestacion%20de%20los%20bosques.pdf>



- 2.18 La minería, según el Instituto de Investigaciones Ambientales del Pacífico, que hace una mirada global de la situación, es la principal causante de la deforestación, destrucción de fuentes hídricas, contaminación de ríos y agua, migración y destrucción de fauna, aculturación y pérdida de identidad de la población. La extracción de petróleo, gas y minerales representa aproximadamente el 7% de la deforestación mundial en los subtrópicos, con un aumento de la exploración y el desarrollo en las cuencas del Amazonas y el Congo. En los países más ricos, las industrias extractivas de petróleo, gas, carbón y minerales continúan degradándose y representan una amenaza para los bosques, como en el bosque boreal canadiense y la taiga rusa, donde se está planificando y desarrollando la infraestructura de transporte de petróleo. La extracción de oro a pequeña escala es responsable de 1/3 del mercurio total liberado al medio ambiente, ya que el mercurio se utiliza para separar el oro de sus minerales. Los métodos de drenaje ácido de la mina y los depósitos de relaves, que contienen productos de desecho de la mina, como sedimentos y minerales, presentan riesgos adicionales. La liberación de tales desechos tiene consecuencias desastrosas, como lo demuestra el caso del colapso de la presa de relaves de la mina Ok Tedi en Papua Nueva Guinea en 1984, que resultó en la deposición de desechos con alto contenido de cobre en más de 10,000 ha de bosques. La extinción del bosque se ha extendido más allá de esta área inmediata en el transcurso de 30 años, ya que los desechos mineros continuaron descargándose en el sistema fluvial. Este tipo de contaminación puede afectar ecosistemas enteros, ya que los metales se reciclan durante períodos prolongados<sup>5</sup>.
- 2.19 De la misma manera se está afectando el Bosque Protector Los Cedros, pues el informe del GAD Municipal de Cotacachi y del mismo Ministerio del Ambiente detallan destrucción del bosque con la apertura de “claros”, es decir tala de bosque y la apertura de trochas. Debemos considerar, que Los Cedros, ubicado al Oeste del Ecuador, es una región aún más afectada por la deforestación que la Amazonía. Es un hotspot o punto caliente de biodiversidad, que, como eco-región, contiene una altísima biodiversidad y endemismo concentrado en estos bosques nublados<sup>6</sup> y es una de las más afectadas del planeta (Gentry, 1992; Myers et al., 2000; León-Yáñez et al., 2012)<sup>7</sup>.
- 2.20 Honorable Corte, respetuosamente decimos que esta situación es la misma que otros bosques protectores del país. En esta causa vemos una oportunidad para que la Corte se subsane este error del Ministerio del Ambiente. El error está en otorgar registros ambientales, los cuales constituyen la categoría más laxa de entre los permisos ambientales a una operación minera dentro de un Bosque Protector. Por el contrario, se debería precautelar los derechos del bosque y exigir al menos una licencia ambiental, que asegure que las actividades extractivas estará en armonía con los derechos de la naturaleza. A mayor abundamiento la diferencia entre un registro y una licencia se explica en la misma página web del Ministerio del Ambiente, “[el] registro ambiental es obligatorio y se obtiene inmediatamente. Consiste en el ingreso de información al Sistema Único de Información Ambiental (SUIA), que de manera automática valida ciertos datos y genera el documento de autorización ambiental, sin requerir procesos de revisión, observación y aprobación de parte de un técnico de la institución. Siendo el proponente del proyecto, el

---

<sup>5</sup> Citado en efectos de las actividades económicas sobre los Bosques en el departamento del Chocó. Giovanni y Eva Ledesma (2007)

<sup>6</sup> Gentry AH. 1992. Tropical forest biodiversity, distributional patterns and their conservational significance *Oikos* 63(1): 19-28.

<sup>7</sup> Gentry AH. 1992. Tropical forest biodiversity, distributional patterns and their conservational significance *Oikos* 63(1): 19-28; León-Yáñez S, Valencia RL, Pitman N, Endara L, Ulloa-Ulloa C, Navarrete H. 2012. Libro Rojo de las Plantas Endémicas del Ecuador, 2nd ed Quito, Ecuador: Pontificia Universidad Católica del Ecuador; Myers N, Mittermeier RA, Mittermeier CG, da Fonseca GAB, Kent J. 2000. Biodiversity hotspots for conservation priorities. *Nature* 403: 853-858.

responsable de la información dada a la autoridad ambiental. Las licencias ambientales tienen su aplicación diferenciada para la etapa de participación social, siendo más ágil para la mayoría de los casos y asegurando que se cumpla la Constitución del Ecuador. La estandarización de formularios y la optimización de etapas reducen los tiempos de respuesta de manera significativa”.

- 2.21 Tan fácil es obtener un registro ambiental que con solo ingresar información a un Sistema Único de Manejo Ambiental, SUIA, este se genera de manera automática e inmediata. Esto nos lleva a entender que el sistema informático SUIA tiene un error pues está programado para generar el más laxo permiso aun cuando estos proyectos estén en Bosques Protectores. Esto pone en riesgo a todos los Bosques Protectores del país pues implica que todo tipo de operaciones mineras están siendo autorizadas a operar a pesar de destruir los bosques, contaminar el agua y dañar los hogares de miles de especies.
- 2.22 Lo antes dicho es una muestra más de cómo por un error administrativo se están afectando los derechos de la naturaleza. Eso contradice el principio de aplicación directa como lo manifiesta la Constitución en el inciso 3 del artículo 11 cuando expresa que:

El ejercicio de los derechos se regirá por los siguientes principios:

3. Los derechos y garantías establecidos en la Constitución y en los instrumentos internacionales de derechos humanos serán de directa e inmediata aplicación por y ante cualquier servidora o servidor público, administrativo o judicial, de oficio o a petición de parte.

Para el ejercicio de los derechos y las garantías constitucionales no se exigirán condiciones o requisitos que no estén establecidos en la Constitución o la ley.

Los derechos serán plenamente justiciables. No podrá alegarse falta de norma jurídica para justificar su violación o desconocimiento, para desechar la acción por esos hechos ni para negar su reconocimiento.

4. Ninguna norma jurídica podrá restringir el contenido de los derechos ni de las garantías constitucionales.

5. En materia de derechos y garantías constitucionales, las servidoras y servidores públicos, administrativos o judiciales, deberán aplicar la norma y la interpretación que más favorezcan su efectiva vigencia [...]”.

### **3. LOS DERECHOS DE LA NATURALEZA**

#### **I. VIVIR EN ARMONÍA CON LA NATURALEZA Y SUMAK KAWSAY, LOS DERECHOS DE LA NATURALEZA DESDE LA JURISPRUDENCIA DE LA TIERRA**

- 3.1 Este caso es de gran importancia, tanto para el Ecuador como para el mundo entero, porque tiene el potencial de establecer una importante e influyente “Jurisprudencia de la Tierra” que ayudará a guiar a la humanidad para que sea una presencia beneficiosa en lugar de destructiva dentro de la comunidad de vida del planeta. Muchos pueblos y comunidades esperan que esta Honorable Corte desarrolle aún más este acercamiento ecológico a la ley, o Jurisprudencia de la Tierra, que está comenzando a surgir en muchos países de todo el mundo (detallado a continuación).
- 3.2 La Jurisprudencia de la Tierra toma como punto de partida que los humanos hemos llegado a existir dentro de un Universo ordenado que es en sí mismo la fuente de las “leyes” o principios más fundamentales. La humanidad debe respetar estas "leyes de la naturaleza" para florecer como especie y seguir siendo miembros de la increíblemente hermosa y compleja comunidad de vida que llamamos "Tierra". Esto significa que los derechos y deberes fundamentales en cualquier constitución o ley deben ser interpretados de tal manera que alineen las reglas humanas con el funcionamiento de la naturaleza para salvaguardar las condiciones que hacen posible y satisfactoria la vida humana. Por ejemplo, la inviolabilidad de la vida humana a que se refiere el artículo 66 (1) de la Constitución no se puede defender y proteger sin proteger también las condiciones necesarias para que la vida florezca. En consecuencia, solicitamos a esta Honorable Corte que interprete y aplique las leyes pertinentes desde la perspectiva de lo que es mejor para la comunidad de vida en su conjunto (incluidas las generaciones futuras).
- 3.3 Este caso es emblemático de las muchas decisiones difíciles que la humanidad ahora está enfrentando. Implica elegir entre continuar permitiendo actividades que destruyen o dañan la naturaleza pero crean empleos y generan impuestos (por ejemplo, la minería) o priorizar la protección y mejoramiento de los sistemas ecológicos vivos que sustentan la vida misma (como el bosque de Los Cedros). Afortunadamente, la Constitución de la República del Ecuador es muy clara en cuanto al camino al que se han comprometido el Estado y el pueblo de Ecuador- se trata del buen vivir (*sumak kawsay*). Como se indica en el Preámbulo de la Constitución, esto implica el compromiso de construir “una nueva forma de convivencia pública, en diversidad y en armonía con la naturaleza, para lograr el buen vivir, el *sumak kawsay*”.
- 3.4 La Constitución también deja claro, en primer lugar, que el buen vivir debe perseguirse viviendo en armonía con la naturaleza (en contraposición a expensas de la naturaleza) y en segundo lugar, que el reconocimiento y el cumplimiento de los derechos de la naturaleza (como se establece en los artículos 71 a 74 de la Constitución) es el mecanismo legal más importante para promover la armonía con la Naturaleza.
- 3.5 Las siguientes disposiciones de la Constitución especifican lo que se requiere para lograr esta manera de vivir bien:

**Artículo 275:**

“El buen vivir requerirá que las personas, comunidades, pueblos y nacionalidades ejerzan efectivamente sus derechos y cumplan con sus responsabilidades en el marco de la interculturalidad, el respeto a su diversidad y la convivencia armónica con la naturaleza.”

**Artículo 14:**

“Se reconoce el derecho de la población a vivir en un ambiente sano y ecológicamente equilibrado, que garantice la sostenibilidad y el buen vivir (sumak kawsay).

La conservación ambiental, la protección de los ecosistemas, la biodiversidad y la integridad de los activos genéticos del país, la prevención del daño ambiental y la recuperación de espacios naturales degradados son asuntos declarados de interés público.”

**Artículo 83:**

“Los ecuatorianos tienen los siguientes deberes y obligaciones, sin perjuicio de los demás previstos por la Constitución o la ley [...]

Respetar los derechos de la naturaleza, preservar un medio ambiente sano y utilizar los recursos naturales de forma racional, sostenible y duradera.

Promover el bienestar público y privilegiar los intereses generales sobre los individuales, en coherencia con el buen vivir.”

**Artículo 250:**

“El territorio de las provincias amazónicas es parte de un ecosistema que es necesario para el equilibrio ambiental del planeta. Este territorio constituirá un distrito especial, para el cual habrá una planificación integral plasmada en una ley que incluya los aspectos sociales, económicos, ambientales y culturales, junto con un ordenamiento territorial y una planificación que asegure la conservación y protección de sus ecosistemas, y el principio de sumak kawsay.”

**Artículo 277:**

“Los deberes generales del Estado para lograr el buen vivir serán:

1. Garantizar los derechos de las personas, las comunidades y la naturaleza.

**Artículo 283:**

“El sistema económico es orientado socialmente y de apoyo mutuo; reconoce al ser humano como sujeto y fin; tiende a una relación dinámica y equilibrada entre sociedad, Estado y mercado, en armonía con la naturaleza; y su objetivo es asegurar la producción y reproducción de las condiciones materiales e inmateriales que pueden propiciar el buen vivir.”

**Artículo 319:**

“El Estado promoverá formas de producción que aseguren el buen vivir de la población y desalentará aquellas que vulneren sus derechos o los de la naturaleza; fomentará una producción que satisfaga la demanda interna y asegure la participación activa del Ecuador en la economía global.”

- 3.6 Las pruebas que muchos expertos presentan ante esta Honorable Corte demostrarán que el Bosque Protector Los Cedros es un ejemplo sobresaliente de una comunidad de vida extremadamente diversa, conectada por millones de interrelaciones de alta complejidad que han tardado muchos millones de años en evolucionar. El Bosque en sí es como un organismo complejo que sustenta a muchas especies en peligro de extinción además de contribuir a la salud integral de todos, por ejemplo, como fuente de agua dulce y oxígeno. La evidencia también establece que, si se permite que prosiga la minería, se dañará la capacidad del bosque de mantener y regenerar sus ciclos vitales; su estructura, funcionamiento, y procesos evolutivos; y es probable que conduzca a la extinción de especies, la destrucción de ecosistemas, y la alteración permanente de los ciclos naturales.
- 3.7 Esto significa que la minería violará los derechos de la Naturaleza consagrados en el artículo 71, que el Estado deberá aplicar medidas preventivas y restrictivas para evitar la extinción de especies, la destrucción de ecosistemas y la alteración permanente de los ciclos naturales (artículo 73) y que el bosque tiene derecho a ser restaurado tras cualquier daño ya incurrido, conforme con el Artículo 72 (si es posible).
- 3.8 Respetuosamente sostenemos que la minería propuesta es ilegal y debe ser prohibida sobre la base de que viola los derechos del Bosque Protector Los Cedros como ecosistema, así como los derechos de los muchos miembros de esa comunidad viva. Permitir que prosiga la minería también sería contrario al objetivo nacional de lograr el buen vivir (sumak kawsay) y, en consecuencia, violaría la Constitución de la República del Ecuador. También sería una violación de los principios fundamentales e innegociables de la Naturaleza que la humanidad debe respetar para vivir en armonía y florecer.

## **II. EL BOSQUE PROTECTOR LOS CEDROS ES UNA ENTIDAD VIVIENTE SUJETO DE DERECHOS Y SE DEBE GARANTIZAR SU DERECHOS**

- 3.9 En el año 2008 la nueva Constitución Política de la República del Ecuador introdujo los derechos a la naturaleza en sus artículos 71, 72, 73 y 74, reconociendo que la naturaleza tiene derecho a existir, a su mantenimiento, regeneración de sus ciclos vitales, estructura, funciones, procesos evolutivos y a su restauración.
- 3.10 Los jueces están familiarizados con el proceso de equilibrar derechos que compiten, entre personas naturales y personas jurídicas (como compañías) con el fin de decidir qué derechos deben prevalecer o priorizarse. Equilibrar derechos es más complejo cuando la corte debe hacerlo entre los Derechos de la Naturaleza y los derechos de una persona jurídica a realizar una actividad autorizada por el gobierno. En este caso, involucra equilibrar los derechos del Bosque Protector Los Cedros y de los miembros de esa comunidad viva contra los derechos de una compañía minera a minar. Podría ser útil, Honorable Corte Constitucional, el considerar un enfoque a

esta pregunta adoptada por los jueces del Tribunal Internacional de Derechos de la Naturaleza que basan sus sentencias en la Declaración Universal de los Derechos de la Madre Tierra (“la Declaración”) la cual ha sido proclamada por la Conferencia de los Pueblos por el Cambio Climático y los Derechos de la Madre Tierra en Cochabamba en 2010. El Tribunal no da más peso a los derechos humanos ni establece una clasificación de importancia basada en la identidad del sujeto legal que tiene esos derechos. Por el contrario, da mayor peso a esos derechos que son inherentemente más importantes (como es el derecho a la vida), sin importar quien los posea, y busca equiparar derechos que compiten en concordancia con el Artículo 1 (7) de la Declaración que dice: “Los derechos de cada ser están limitados por los derechos de otros seres, y cualquier conflicto entre sus derechos debe resolverse de manera que mantenga la integridad, equilibrio y salud de la Madre Tierra.” Este enfoque reconoce que el priorizar el interés colectivo de la comunidad también beneficia a cada miembro de la comunidad. También es consistente con otros casos de Ecuador, como el del caso del Río Vilcabamba, en el que el Tribunal dio más peso a proteger los derechos fundamentales del río a fluir libre y desarrollar su rol natural en el ecosistema que el derecho del Gobierno Provincial a depositar tierra y rocas para la ampliación de la carretera y afectar al río.

- 3.11 Así mismo, el artículo 14 de la Constitución establece el derecho a vivir en un medio ambiente sano y el interés público en la preservación del medio ambiente:

“Se reconoce el derecho de la población a vivir en un ambiente sano y ecológicamente equilibrado, que garantice la sostenibilidad y el buen vivir, *sumak kawsay*. Se declara de interés público la preservación del ambiente, la conservación de los ecosistemas, la biodiversidad y la integridad del patrimonio genético.”

- 3.12 Reconocer a la naturaleza como sujeto de derechos, evidencia una evolución en el derecho, que busca posicionar a la naturaleza en el mismo régimen de derechos que los seres humanos. Esto implica que nadie puede apropiarse, abusar, interferir o irrespetar los derechos de quien los ostenta, con lo que la naturaleza hoy por hoy en el Ecuador cuenta con un estatus igual de privilegiado que todos los ciudadanos ecuatorianos y seres humanos. Darle a la naturaleza derechos es la más efectiva estrategia para luchar contra la crisis climática y romper el modelo de desarrollo actual que prioriza ganancias monetarias por sobre el buen vivir. La naturaleza provee a los seres humanos de alimentos, materias para producir, agua y estabiliza los climas de nuestro planeta, por lo tanto, darle derechos a la naturaleza garantiza la vida misma de los ecosistemas terrestres, en los que vive el ser humano.
- 3.13 El desarrollo constitucional del Ecuador ha sido respaldado por la Corte Interamericana de Derechos Humanos a través del desarrollo de la jurisprudencia en torno a la protección del derecho a un medio ambiente sano como un derecho autónomo, a través de la interpretación conjunta del artículo 26 de la Convención Americana sobre Derechos Humanos (CADH)<sup>8</sup> en relación con el artículo 11 del Protocolo de San Salvador<sup>9</sup> (PSS). Ambos instrumentos internacionales han sido

---

<sup>8</sup> Artículo 26 de la CADH. Derechos Económicos, Sociales Y Culturales. Desarrollo Progresivo. Los Estados Partes se comprometen a adoptar providencias, tanto a nivel interno como mediante la cooperación internacional, especialmente económica y técnica, para lograr progresivamente la plena efectividad de los derechos que se derivan de las normas económicas, sociales y sobre educación, ciencia y cultura [...].

<sup>9</sup> Protocolo Adicional a la Convención Americana sobre Derechos Humanos en materia de derechos económicos, sociales y culturales. artículo 11. Derecho a un Medio Ambiente Sano

ratificados y adoptados por la República del Ecuador y son parte integrante de la legislación nacional vigente.

- 3.14 La Corte Interamericana de Derechos Humano en la Opinión Consultiva Oc-23/17 del 15 de noviembre del año 2017 en su párrafo 62 ha señalado: “Esta Corte considera importante resaltar que el derecho al medio ambiente sano como derecho autónomo, a diferencia de otros derechos, protege los componentes del medio ambiente, tales como bosques, ríos, mares y otros, como intereses jurídicos en sí mismos, aún en ausencia de certeza o evidencia sobre el riesgo a las personas individuales. Se trata de proteger la naturaleza y el medio ambiente no solamente por su conexidad con una utilidad para el ser humano o por los efectos que su degradación podría causar en otros derechos de las personas, como la salud, la vida o la integridad personal, sino por su importancia para los demás organismos vivos con quienes se comparte el planeta, también merecedores de protección en sí mismos. En este sentido, la Corte advierte una tendencia a reconocer personería jurídica y, por ende, derechos a la naturaleza no solo en sentencias judiciales sino incluso en ordenamientos constitucionales.”<sup>10</sup>
- 3.15 En esta ocasión Las organizaciones están respetuosamente solicitando a esta Honorable Corte que restablezca el imperio del derecho y garantice los derechos del Bosque Protector Los Cedros pues están siendo conculcados por la actividad minera
- 3.16 El Bosque Protector Los Cedros está siendo amenazado en su existencia, ciclos vitales y procesos evolutivos, así lo determinó el informe de Dirección Provincial del Ambiente de Imbabura, Unidad de Calidad Ambiental y Unidad de Patrimonio Natural, en su Informe Técnico Nro. 0025-UCA-DPAI- MAE-O cuando evidenció: “el desbroce de vegetación nativa, afectación a brinzales (plantas de 30cm a 1.5m de altura) y latizales (individuos de 2.5 a 9.9 cm de diámetro a la altura del pecho dap) de dicha vegetación y de especies conocidas en la zona como sangre de gallina, guarumo, canelo, zancona, entre otras. Se verificó además la creación de claros mayores a 1,5m de ancho, la apertura de una troncha de aproximadamente 1.5km de distancia; y al final de esta se observó una área de aproximadamente 100m2 donde se ha realizado corte de vegetación, afectando a brinzales, latizales y árboles con dap igual o mayor a 10 cm. b. Adicionalmente se encontró dentro del sendero que fue creado, huellas de oso de anteojos y heces frescas, especie que se encuentra en estado de vulnerabilidad dentro del ecosistema de bosque andino. Y concluyó determinando que efectivamente se realizaron actividades de remoción de cobertura vegetal para la apertura de un sendero de aproximadamente 1.5km de distancia en donde su ancho en algunos casos es mayor a 1.50m, así mismo evidenció la realización de un claro de aproximadamente 100,00m2. Dada esta situación, queremos llamar la atención de la Honorable Corte sobre tres elementos importantes de análisis al respecto del derecho de los bosques: 1) se hace necesario el respeto de los derechos de los bosques por ser la “casa” de miles de otras especies de flora y fauna y de importantes servicios ambientales; 2) Es importante para la mitigación de los efectos negativos del calentamiento global y por lo tanto los bosques son importantes para el país y para la humanidad; 3) este caso no es aislado,

---

1. Toda persona tiene derecho a vivir en un medio ambiente sano y a contar con servicios públicos básicos.

2. Los Estados parte promoverán la protección, preservación y mejoramiento del medio ambiente.

<sup>10</sup> Corte Interamericana de derechos Humanos, *Opinión Consultiva solicitada por la República de Colombia*, OC-23/17, 15 de noviembre de 2017, párr. 62

con él se demuestra lo que está pasando con la minería y su negativa influencia en el exterminio de los bosques de todo el país.

- 3.17 El Ministerio del Ambiente ha manifestado que los Bosques Protectores no se encuentran dentro del Sistema Nacional de Áreas Protegidas. Eso no obsta a que se les garantice sus derechos reconocidos derecho a existir, a su mantenimiento, regeneración de sus ciclos vitales, estructura, funciones, procesos evolutivos y a su restauración. Asimismo, no quiere decir que no gocen de una categoría de protección aprobada por Ley y por cada acuerdo Ministerial que declara a un bosque bajo esta categoría. Un Bosque Protector es un Bosque bajo una categoría de protección aprobada por Ley en el COA actualmente y en la anterior Ley Forestal, de Áreas Naturales y vida Silvestre.
- 3.18 Por lo expuesto, le pedimos respetuosamente a esta Honorable Corte que restablezca el imperio del derecho conculcado y corrija el manifiesto error del Ministerio del Ambiente y garantice la efectividad de los derechos de los bosques del país. Así, respetuosamente solicitamos a esta Honorable Corte, que ordene al Ministerio del Ambiente que cuando los proyectos mineros puedan afectar directa o indirectamente los bosques protectores se le exija una licencia ambiental y no un mero registro automático hecho por un sistema informático.
- 3.19 Existen ejemplos de casos en los que las Cortes del Ecuador precautelan los derechos de la naturaleza que están siendo violentados. Un ejemplo de ello es la victoria de la naturaleza en la Acción de Protección por Violación de los Derechos del Río Blanco dictada por Corte Provincial de Pichincha<sup>11</sup>. Este caso los dueños de un predio ubicado en Tabacundo, Pichincha, obtuvieron una concesión minera artesanal para la explotación de materiales pétreos, comenzaron a realizar estas actividades sin contar con el licenciamiento ambiental respectivo por lo que se estaba provocando el deslizamiento de materiales en el Río Granobles (Río Blanco), causando su afectación. Frente a esta situación dos particulares presentaron una acción de protección, en enero de 2013, por la presunta violación de los derechos del Río Blanco y por amenaza de vulneración del derecho al agua; en la acción también solicitaron medidas cautelares, específicamente: el desalojo y retiro de la maquinaria, volquetas y más herramientas que se encuentran en el sitio; la suspensión inmediata de la actividad de explotación de la cantera hasta la resolución de la acción. Al calificar la demanda se aceptaron estas medidas y se ordenó la suspensión de las actividades de explotación de la cantera. Para dictar sentencia de primera instancia se realizan varias consideraciones: a) Todos los derechos son plenamente justiciables e igualmente jerárquicos; b) Se asimiló la inversión de la carga de la prueba en los casos de daño ambiental con una acción afirmativa o condición especial para el ejercicio de los derechos; c) Se acogió el principio in dubio pro natura estableciéndose que éste debe informar la decisión del juzgador a favor de la naturaleza cuando existan dudas; d) Se tomó el principio de precaución afirmándose que cuando exista amenaza a la naturaleza no se debe esperar tener estudios exhaustivos para tomar medidas para evitar daños; e) Se realizó una ponderación entre el derecho al trabajo de los accionados y la solicitud de suspensión definitiva de la actividad, solicitada en la demanda, decidiéndose que la suspensión provisional hasta que se tomen las medidas necesarias que aseguren el mínimo impacto ambiental; además, se hace referencia a la importancia del Río Blanco por ser fuente de provisión de agua de consumo y de riego para la población

---

<sup>11</sup> Sentencia de la Tercera Sala de Garantías Penales de la Corte Provincial de Pichincha de 19 de julio de 2013, *Caso No. 2013-0098*. Disponible en < <http://www.funcionjudicial-pichincha.gob.ec/index.php>



cercana, así como la vida acuática que debe ser protegida. En sentencia se resolvió aceptar parcialmente la acción y se dispuso la suspensión temporal de las actividades mineras hasta que se obtenga la correspondiente licencia ambiental; además se manda a realizar un estudio de agua del Río Blanco a fin de efectuar los procesos de remediación correspondientes. La decisión de primera instancia fue apelada por los accionados, resolviendo la Corte negar la apelación y ratificar la resolución de primera instancia fundamentando la decisión en el régimen prioritario de protección de elementos naturales y de los derechos de la naturaleza, principio de precaución, régimen normativo sobre licenciamiento ambiental, derecho a vivir en un ambiente sano, e inversión de la carga de la prueba.

- 3.20 De la misma manera le solicitamos a esta Honorable Corte que se garantice los derechos de los bosques reconocidos en la Constitución de la República, y que se falle en concordancia con el interés superior del bosque, considerando su valor intrínseco. Y, en consecuencia, que los proyectos mineros no se realicen en estos ecosistemas a menos que se apliquen los más altos estándares ambientales que garanticen su conservación.

**III. LOS RÍOS DEL BOSQUE PROTECTOR LOS CEDROS SON ENTIDADES VIVIENTE SUJETO DE DERECHOS Y SE DEBE GARANTIZAR SUS DERECHOS INTRINSECOS**

- 3.21 Los bosques montanos del Ecuador, como es el caso del bosque protector Los Cedros, son particularmente importantes para el ciclo del agua en un área mucho más extensa de la que cubren, debido a la captura de agua a través de su alta diversidad de plantas epífitas, como helechos, bromelias y orquídeas que viven sobre los árboles. Estas epífitas absorben el agua de la niebla, ayudando a estos bosques a capturar hasta un 75% de agua adicional a través de la niebla, permitiendo que los bosques nublados mantengan un flujo constante aguas abajo durante los periodos secos.
- 3.22 En el bosque protector Los Cedros nacen tres ríos: el río Manduriacu, el río Verde y el río los Cedros, además de que abarca la orilla sur del río Magdalena. Estos ríos suministran agua a las personas que se encuentran río abajo, y son el hábitat de una increíble biodiversidad de vida. Mantener esos ríos protegidos y limpios para quienes viven aguas abajo, fue uno de los objetivos principales para la creación y reconocimiento legal del Bosque Protector Los Cedros a través de resolución del INEFAN publicada en el Registro Oficial Nro. 620, con fecha 26 de enero de 1995.
- 3.23 Tal como la Sala Multicompetente de la Corte Provincial de Imbabura pudo comprobar, el registro ambiental que dio viabilidad al Proyecto Minero Río Magdalena en fase de exploración inicial en mediana y gran minería (metálicos y no metálicos), ubicado dentro del Bosque Protector Los Cedros; constituye una amenaza cierta a la vida y salud de los ríos Manduriacu, Los Cedros, Verde y Magdalena desde su nacimiento y en todo su cauce. Así lo describe el propio Estudio de Impacto Ambiental del proyecto minero del proyecto Concesión Minera Río Magdalena en su página 5, al prever como uno de sus principales impactos ambientales en el bosque protector Los Cedros, la contaminación del agua y de las fuentes locales. Frente a ello, el estado ecuatoriano tiene la responsabilidad jurídica de velar por los derechos expresamente reconocidos por la Constitución de Ecuador a la naturaleza y a los ríos. Para ilustrar a vuestro despacho, estos derechos han sido

ya expresamente reconocidos por tribunales nacionales y de derecho comparado, como describimos a continuación.

- 3.24 Como ya hemos señalado la Constitución Política de la República del Ecuador introdujo en sus artículos 71, 72, 73 y 74, reconociendo que la naturaleza tiene derecho a existir, a su mantenimiento, regeneración de sus ciclos vitales, estructura, funciones, procesos evolutivos y a su restauración. Estos derechos han sido reconocidos a favor del río en las Cortes Ecuatorianas. En consecuencia los ríos son seres vivos sujetos de derechos bajo la Constitución Ecuatoriana y el estado debe respetar, garantizar y proteger la vigencia de estos derechos.
- 3.25 La República del Ecuador cuenta con importante y destacada jurisprudencia destacada en protección de la ley de la tierra y de los ríos, como sujetos de derechos. Una de las decisiones más emblemáticas y comentada internacionalmente fue la primera decisión que falló a favor de los derechos de la naturaleza en el 2011, en la cual la Corte Provincial del Loja acoge la Acción de Protección por Violación de los Derechos de la Naturaleza respecto al Río Vilcabamba<sup>12</sup>. En 2008 el Gobierno Provincial de Loja inició trabajos de ampliación de la vía Vilcabamba-Quinara, sin embargo, no se contaba con los estudios de impacto ambiental correspondiente y se estaban arrojando los escombros y material de excavación directamente al Río Vilcabamba. Como consecuencia de estos trabajos se afectó el cauce del Río, provocando inundaciones que nunca se habían producido con antelación. En diciembre de 2010 dos extranjeros presentaron por primera vez una acción de protección “a favor de la Naturaleza, particularmente a favor del Río Vilcabamba” y en contra del Gobierno Provincial de Loja. En segunda instancia se resolvió acogiendo el recurso y declarando que se han violado los derechos de la naturaleza. Finalmente, las cortes concluyeron que no existe una colisión de derechos constitucionales, entre la necesidad de la ampliación de la carretera y los derechos de la naturaleza, sino que solamente se requiere que esta obra se la realice respetando los derechos de la naturaleza y cumpliendo la normativa ambiental. En la sentencia se establecieron las siguientes obligaciones: (i) que dé cumplimiento a las recomendaciones de acciones correctivas que el Ministerio de Ambiente ha realizado respecto a la obra; en caso de no cumplirlas se advierte con suspender la obra; (ii) que ofrezca disculpas públicas por iniciar una obra sin contar con el estudio de impacto ambiental correspondiente. Como medida adicional se delegó a la Dirección Provincial del Ministerio del Ambiente y Dirección Provincial de la Defensoría del Pueblo el seguimiento del cumplimiento de la sentencia.
- 3.26 La normativa y jurisprudencia comparada también ha reconocido una serie de ríos como sujeto de derechos. En Colombia, la Corte Constitucional de Colombia (Sexta Sala de Revisión, T-622 de 2016) “Reconocer al Río Atrato, su cuenca y afluentes como una entidad sujeto de derechos a la protección, conservación, mantenimiento y restauración a cargo del Estado y las comunidades étnicas [...]”, la Corte ordenará al Gobierno nacional que ejerza la tutoría y representación legal de los derechos del Río (a través de la institución que el Presidente de la República designe, que bien podría ser el Ministerio de Ambiente) en conjunto con las comunidades étnicas que habitan en la cuenca del Río Atrato en Chocó; de esta forma, el Río Atrato y su cuenca -en adelante- estarán

---

<sup>12</sup> Richard Frederick Wheeler y Eleanor Geer Huddle c/ Gobierno Provincial de Loja, Corte Provincial de Justicia del Loja, juicio 11121-2011-0010 (30 March 2011), Disponible online: [https://www.elaw.org/system/files/ec.wheeler.loja\\_.pdf](https://www.elaw.org/system/files/ec.wheeler.loja_.pdf)

representados por un miembro de las comunidades accionantes y un delegado del Gobierno colombiano, quienes serán los guardianes del Río [...].”<sup>13</sup>

- 3.27 En la India, los tribunales también han dado pasos significativos en el reconocimiento y protección de los derechos de la naturaleza. El Tribunal Supremo de Uttarakhand en India otorgó personería jurídica a los Ríos Ganges y Yamuna<sup>14</sup>. El mismo Tribunal Supremo de Uttarakhand, solo unos días después en otro caso señaló: “Los ríos, bosques, lagos, cursos de agua, aire, glaciares y manantiales tienen derecho a existir, persistir, mantener, mantener y regenerar su propio sistema de ecología vital. Los ríos no son solo cursos de agua. Ellos están científicamente y biológicamente vivos. Los ríos, bosques, lagos, cuerpos de agua, aire, glaciares, vida humana están unificados y son indivisibles en su conjunto. Se requiere mantener la integridad de los ríos desde los glaciares hasta el océano”. (Resaltado propio).<sup>15</sup>
- 3.28 Por otro lado, en Nueva Zelanda, se optó por el camino legislativo reconociendo como personas jurídicas al Río Whanganui<sup>16</sup>. En el 2017, el Parlamento de Nueva Zelanda aprobó un tratado que reconoce el Río Whanganui como una “persona jurídica”, a la que debería serle restituida la salud por ser su derecho. Este tratado, el primero en el mundo en otorgar personalidad jurídica a un río, concluye un esfuerzo de 150 años por parte del pueblo maorí para otorgar reconocimiento legal al río como su antepasado. Los Whanganui Iwi consideran el río Te Awa Tupua, inseparable de las montañas vivas y el mar, y lo dotan de una gran importancia cultural y religiosa. El tratado permite a los tribunales designar a los guardianes del río y considera que cualquier daño que se le pueda hacer es indistinguible de una lesión sufrida por los Iwi. Los Iwi creen que este tratado resuelve los problemas tradicionales de propiedad del río y lo diseñaron para restaurar la salud del río y del ecosistema circundante. La ley nombró guardianes para el río Whanganui a quienes son responsables legales de representar los intereses del río en la toma de decisiones, conflictos; incluyendo “promover y proteger la salud y el bienestar” del río y actuar a favor de sus intereses.
- 3.29 Los casos expuestos aportan importantes elementos para el análisis de la materia; sin duda el caso del PB Los Cedros constituye una nueva oportunidad para la República del Ecuador de reafirmar la vigencia de su Constitución y la protección de los derechos de la Pacha Mama; por medio del reconocimiento expreso de los derechos inherentes a los ríos Verde, Manduriaco y Los Cedros; que nacen y dependen de los ecosistemas del bosque Protector Los cedros.
- 3.30 En el año 1999 el filósofo Thomas Berry, uno de los grandes impulsores de la Ley de la Tierra y los derechos de la naturaleza, en sus 10 principios jurisprudenciales señalaba que Cada componente de la comunidad de la tierra tiene 3 derechos, a existir, a permanecer y derecho a desarrollar su rol en una constante renovación de los procesos de la comunidad terrestre. Sigue, que los derechos de cada entidad natural varían con las especies o el rol específico de esas especies, así los ríos tienen derechos de los ríos, los pájaros tienen derecho de los pájaros, los insectos tienen

---

<sup>13</sup> Corte Constitucional de Colombia, Sala Sexta de Revisión, Acción de tutela del Río Atrato, T-622 de 2016, 10 de noviembre, 2016

<sup>14</sup> Mohd. Salim v. State of Uttarakhand & Others, High Court of Uttarakhand at Nainital, Writ Petition (PIL) No. 126 of 2014 (Mar. 20, 2017). Esta decisión ha sido impugnada y se encuentra pendiente de revisión.

<sup>15</sup> Lalit Miglani v. State of Uttarakhand & Others, High Court of Uttarakhand at Nainital, Writ Petition (PIL) No.140 of 2015 (Marzo 30, 2017).

<sup>16</sup> Nueva Zelanda, Te Awa Tupua (Whanganui River Claims Settlement) Act 2017.

derecho de los insectos y los humanos tienen derechos humanos, y establece que la diferencia es cualitativa y no cuantitativa.<sup>17</sup>

- 3.31 Lo que nos dice Berry no es en absoluto descabellado si observamos la especificación de los derechos humanos. Se hace indispensable para el avance de los derechos de los ríos la declaración explícita de los derechos fundamentales de los ríos a través de la sentencia judicial reconociendo un catálogo de derechos mínimos específicos de los ríos.
- 3.32 La Declaración Universal de los Derechos de los Ríos impulsada por Earth Law Center ha identificado como derecho intrínseco de los ríos los siguientes derechos: (1) El derecho al flujo; (2) El derecho a ejercer sus funciones esenciales con el ecosistema; (3) El derecho a estar libre de toda contaminación; (4) El derecho a alimentar y ser alimentado por sus afluentes; (5) El derecho a biodiversidad nativa; y (6) El derecho a la restauración. Además, se añade que “cada río tendrá derecho al nombramiento independiente de uno o más guardianes legales, que actúen únicamente en nombre de los derechos del río, con al menos un guardián legal como representante indígena de aquellos ríos de los cuales dependen las comunidades indígenas.”<sup>18</sup>
- 3.33 Los ríos son asimismo fuentes de agua dulce a través de las cuales la población se sirve para satisfacer sus necesidades domésticas, agropecuarias, agrícolas, industriales y de recreación. El bienestar del río es el bienestar de la población. Un río libre de contaminación permite es el presupuesto necesario para satisfacer el derecho a la vida, a la salud, al agua, a la soberanía alimentaria, a un medio ambiente sano de la población a la cual abastecen, esta es una dimensión imposible de eludir.
- 3.34 La constitución de Ecuador en su artículo 318 es clara en establecer:
- 3.35 El agua es patrimonio nacional estratégico de uso público, dominio inalienable e imprescriptible del Estado, y constituye un elemento vital para la naturaleza y para la existencia de los seres humanos. Se prohíbe toda forma de privatización del agua. La gestión del agua será exclusivamente pública o comunitaria [...] El Estado, a través de la autoridad única del agua, será el responsable directo de la planificación y gestión de los recursos hídricos que se destinarán a consumo humano, riego que garantice la soberanía alimentaria, caudal ecológico y actividades productivas, en este orden de prelación [...]
- 3.36 Asimismo, Ley Orgánica de Recursos Hídricos, Usos y Aprovechamiento del Agua Establece en su artículo 57 y siguientes establece:

**Artículo 57.-** *El derecho humano al agua es el derecho de todas las personas a disponer de agua limpia, suficiente, salubre, aceptable, accesible y asequible para el uso personal y doméstico en cantidad, calidad, continuidad y cobertura [...]* El

---

<sup>17</sup> Berry, Thomas. 10 principios jurisprudenciales. Disponible en: <https://therightsofnature.org/thomas-berrys-ten-principles-of-jurisprudence/>

<sup>18</sup> Earth Law Center, Declaración Universal de los Derechos de los Ríos, [en línea] [https://static1.squarespace.com/static/55914fd1e4b01fb0b851a814/t/5a1f2d5e71c10b41b56e0cf3/1511992671846/Declaracion+Universal+de+los+Derechos+de+los+Ri%C3%81os\\_Oct+2017.pdf](https://static1.squarespace.com/static/55914fd1e4b01fb0b851a814/t/5a1f2d5e71c10b41b56e0cf3/1511992671846/Declaracion+Universal+de+los+Derechos+de+los+Ri%C3%81os_Oct+2017.pdf)

derecho humano al agua es fundamental e irrenunciable. Ninguna persona puede ser privada y excluida o despojada de este derecho. El ejercicio del derecho humano al agua será sustentable, de manera que pueda ser ejercido por las futuras generaciones. La Autoridad Única del Agua definirá reservas de agua de calidad para el consumo humano de las presentes y futuras generaciones y será responsable de la ejecución de las políticas relacionadas con la efectividad del derecho humano al agua.

**Artículo 58.-** Exigibilidad del derecho humano al agua. Las personas, comunidades, pueblos, nacionalidades, colectivos y comunas podrán exigir a las autoridades correspondientes el cumplimiento y observancia del derecho humano al agua, las mismas que atenderán de manera prioritaria y progresiva sus pedidos. Las autoridades que incumplan con el ejercicio de este derecho estarán sujetas a sanción de acuerdo con la ley.

**Artículo 60.-** Libre acceso y uso del agua. El derecho humano al agua implica el libre acceso y uso del agua superficial o subterránea para consumo humano, siempre que no se desvíen de su cauce ni se *descarguen vertidos ni se produzca alteración en su calidad o disminución significativa en su cantidad* ni se afecte a derechos de terceros y de conformidad con los límites y parámetros que establezcan la Autoridad Ambiental Nacional y la Autoridad Única del Agua. La Autoridad Única del Agua mantendrá un registro del uso para consumo humano del agua subterránea

- 3.37 Los proyectos mineros presentes en el bosque protector Los Cedros claramente afectan la calidad del agua a través de la contaminación de los ríos. Esto redundará en una afectación directa de acceso al derecho humano al agua, afectando asimismo derechos conexos como el derecho a la vida, salud, soberanía alimentaria, y a un medio ambiente sano.
- 3.38 En virtud de lo antes dicho, a fin de garantizar el derecho autónomo e intrínseco de los ríos así como el derecho humano de acceso al agua se solicitará respetuosamente en este acto que declare a los ríos Manduriacu, el río Verde, el río los Cedros y río Magdalena como sujeto de derechos y que no solo reconozca los existir, a su mantenimiento, regeneración de sus ciclos vitales, estructura, funciones, procesos evolutivos y a su restauración., sino que sus derechos fundamentales inherentes como río, los cuales son: (1) El derecho al flujo; (2) El derecho a ejercer sus funciones esenciales con el ecosistema; (3) El derecho a estar libre de toda contaminación; (4) El derecho a alimentar y ser alimentado por sus afluentes; (5) El derecho a biodiversidad nativa; (6) derecho a se restaurado y (7) derecho a ser representado.

#### **IV. DERECHO A LA RESTAURACIÓN**

3.39 En este caso es preciso prestar especial atención al derecho de las entidades naturales a ser restauradas. La Constitución de la República del Ecuador consagra el derecho a la restauración de la naturaleza en el artículo 72. En este artículo otorga al mundo natural un derecho a la restauración independiente del derecho a la compensación de los humanos. El alivio debe regresar a la parte lesionada, la naturaleza, sin importar si el daño también es causado a los humanos.

3.40 El artículo 396 de la Constitución vincula este derecho con la responsabilidad objetiva de restaurar, cómo explica su segundo párrafo:

“[...]la responsabilidad por daños ambientales es objetiva. Todo daño al ambiente, además de las sanciones correspondientes, implicará también la obligación de restaurar integralmente los ecosistemas e indemnizar a las personas y comunidades afectadas. Cada uno de los actores de los procesos de producción, distribución, comercialización y uso de bienes o servicios asumirá la responsabilidad directa de prevenir cualquier impacto ambiental, de mitigar y reparar los daños que ha causado, y de mantener un sistema de control ambiental permanente. Las acciones legales para perseguir y sancionar por daños ambientales serán imprescriptibles.”

3.41 La responsabilidad objetiva busca establecer a quien ocasionó el daño como responsable de la restauración a la naturaleza, incluso cuando estos hayan sido causados por una actividad lícita.

3.42 Por su Parte, el Código Orgánico Ambiental en el artículo 11, establece lo siguiente:

“De conformidad con los principios y garantías ambientales establecidas en la Constitución, toda persona natural o jurídica que cause daño ambiental tendrá responsabilidad objetiva, aunque no exista dolo, culpa o negligencia. Los operadores de las obras, proyectos o actividades deberán mantener un sistema de control ambiental permanente e implementarán todas las medidas necesarias para prevenir y evitar daños ambientales, especialmente en las actividades que generan mayor riesgo de causarlos.”

3.43 El bosque protector Los Cedros goza el derecho a la restauración ecológica gracias a la constitución ecuatoriana y al Código Orgánico Ambiental, y el Estado Ecuatoriano no está exento de las responsabilidades de ningún de los dos documentos. Tiene el mandato de restaurar inmediata y subsidiariamente conforme lo establece el artículo 397 de la Constitución que manifiesta que:

“En caso de daños ambientales el Estado actuará de manera inmediata y subsidiaria para garantizar la salud y la restauración de los ecosistemas. Además de la sanción correspondiente, el Estado repetirá

contra el operador de la actividad que produjera el daño las obligaciones que conlleve la reparación integral, en las condiciones y con los procedimientos que la ley establezca. La responsabilidad también recaerá sobre las servidoras o servidores responsables de realizar el control ambiental.”

- 3.44 Lo más importante de este artículo es el espíritu de los asambleístas constituyentes de no dejar desprotegida a la naturaleza y garantizar la inmediatez y vigencia de su derecho a restaurarse a pesar de que los causantes de los daños no inicien su restauración, ni respondan inmediatamente. Por haber violado el derecho del bosque al principio de precaución, el Estado Ecuatoriano tiene que restaurar lo más pronto posible el peligro que ha creado ilegalmente para Los Cedros.
- 3.45 La jurisprudencia ecuatoriana reconoce el derecho a la restauración, como muestra la sentencia n° 218-15-SEP-CC dictada en el caso n° 1281-12-EP. Dice la corte que:
- “En razón de la interpretación sistemática de los derechos constitucionales –los de la naturaleza– conforme lo determina la Constitución de la República, tiene derecho a la restauración, por tanto, y en aplicación de los artículos 396 y 397 de la Norma Fundamental, el Estado deberá iniciar las acciones legales en contra de los responsables a fin de devolver a la naturaleza afectada por esta actividad, a un estado que permita un funcionamiento adecuado del sistema natural.”
- 3.46 Aplicando la regla de esta sentencia a este caso, el Ministerio del Ambiente debe asegurar la vigencia de los derechos constitucionales violados por haber emitido el registro ambiental ENAMI, y debe proceder con la reparación del derecho constitucional de la naturaleza que fue vulnerado.
- 3.47 También la Sentencia No. 09171-2015-0004 confirmó el deber del Estado de establecer mecanismos para lograr la restauración del daño a la naturaleza y la adopción de mecanismos para mitigar las consecuencias perjudiciales de la protección de la naturaleza y las especies. En respuesta a una demanda civil de 2009 por miembros de la comunidad cuyos derechos fueron lesionados por las operaciones agrícolas industriales de la empresa PRONACA, el Juzgado 19 Civil de la provincia de Pichincha no solo reconoció los derechos de las personas a un medio ambiente limpio y saludable, sino que también reconoció los derechos de las personas. la naturaleza debe ser restaurada a su condición ecológica como existía antes de la actividad agrícola.
- 3.48 Colombia, a través de su Corte Constitucional también ha reconocido el derecho a la restauración de la naturaleza. Asimismo, la Corte ordenó al Gobierno Nacional que ejerza la tutoría y representación legal de los derechos del Río Atrato en conjunto con las comunidades étnicas que habitan en la cuenca del Río Atrato en Chocó; de esta forma, el Río Atrato y su cuenca –en adelante– estarán representados por un miembro de las comunidades accionantes y un delegado del Gobierno colombiano, quienes serán los guardianes del Río. Esta experiencia es una guía de

lo que la presente Honorable Corte es llamada a declarar, en beneficio de Los Cedros.

- 3.49 Dictar órdenes de restauración, en muchos países, se ha convertido en forma de garantizar los derechos de los seres humanos, de la naturaleza y de la aplicación de las leyes y reglamentos nacionales. El derecho comparado y su jurisprudencia demuestran la importancia orientar legislativa y jurisprudencialmente el reconocimiento de los componentes medioambientales como sujeto de derechos hacia un ordenamiento jurídico modelo que respete la ley de la tierra con una perspectiva ecocéntrica, por lo que invitamos respetuosamente a esta Honorable Corte a adoptarlo en la resolución de este caso. Por lo expuesto, solicitamos a la Honorable Corte que pueda garantizar que se respete el derecho a restauración de la naturaleza, a través de órdenes específicas que permitan que sea efectivo el derecho del bosque protector Los Cedros.

## **V. DERECHO A LA REPRESENTACIÓN. GUARDIANES DEL BOSQUE PROTECTOR LOS CEDROS Y SUS RÍOS**

- 3.50 Las entidades naturales no poseen una voz propia, por lo que es preciso el establecimiento de la institución denominada en el derecho comparado Guardianes para hacer efectivo los derechos de las entidades naturales reconocidos, esta debe una institucionalidad específica que sea su cara visible y los represente con autonomía.
- 3.51 La representación de las entidades naturales también es un derecho fundamental, como lo ha reconocido el derecho comparado. Por ejemplo, el Estado Colombiano a través de las sentencias del río Atrato y de la Amazonía Colombiana. Lo mismo ocurre con la legislación comparada como es el caso de Nueva Zelanda, Te Awa Tupua (Whanganui River Claims Settlement) Act, 2017 y Te Urewera Act 2014 donde declarar a río Whanganui como sujeto de derechos y se regula entre otras cosas el nombramiento y funciones de los guardianes. Lo mismo ocurre respecto del Parque Nacional Te Urewera. Y el mismo camino sigue la sentencia que declara río Ganges, en India, como una entidad viviente sujeto de derechos, en que también se ordena el establecimiento de los guardianes.<sup>19</sup>
- 3.52 En Ecuador, Código General de Procesos Orgánicos de Ecuador de 2015 le encarga a la Defensoría del Pueblo que represente los intereses de la naturaleza y defienda sus derechos. Los artículos 38-39 del Código General Orgánico de Procesos de 2015 establecen:

La naturaleza puede estar representada por cualquier persona física o jurídica, la colectividad o el Defensor del Pueblo nacional, que también puede actuar por iniciativa propia. La naturaleza no puede ser demandada en la corte o reprendida. El Defensor del Pueblo responderá de acuerdo con la ley y con este Código. Las acciones por los daños ambientales y los daños causados a las personas o sus bienes como resultado de esto se ejercerán por separado e

---

<sup>19</sup> Mohd. Salim v. State of Uttarakhand & Others, High Court of Uttarakhand at Nainital, Write Petition (PIL) No. 126 of 2014 (Mar. 20, 2017). Esta decisión ha sido impugnada y se encuentra pendiente de revisión.



independientemente. Las medidas correctivas y reparadoras para los daños ambientales, así como su implementación, se someterán a la aprobación del Autoridad ambiental nacional [Ministerio del Ambiente]. En los casos en que no existan tales medidas, un juez las ordenará. La Defensoría del Pueblo es un aliado valioso en la implementación efectiva de los Derechos de la Naturaleza, de conformidad con la Constitución.

- 3.53 En el mismo sentido, la Constitución en el inciso 2 y tercero del artículo 71, establece que “toda persona, comunidad, pueblo o nacionalidad podrá exigir a la autoridad pública el cumplimiento de los derechos de la naturaleza.
- 3.54 La representación popular de la naturaleza puede ser un mecanismo efectivo a posteriori de restablecimiento del derecho, cuando los derechos de las entidades naturales ya han sido conculcados. Sin embargo, para asegurar garantizar la vigencia de los derechos de las entidades naturales es indispensable un organismo colegiado y representativo que tenga como principal misión actuar en su nombre y representación, que sea la cara humana visible del bosque y su ecosistema teniendo como principal fin de defender, promover y proteger su salud y bienestar del río. Para ello es necesario que esta Honorable Corte reconozca el derecho del bosque Protector los Cedros de ser representado e invista esta institución de plena capacidad técnica, económica y jurídica para alcanzar sus objetivos y que se le reconozca todos los poderes que sean razonablemente necesario para ejercer sus funciones, deberes y obligaciones.
- 3.55 A los guardianes se les debe reconocer un presupuesto para ejercer sus funciones. Se les debe reconocer como la cara humana del bosque y su ecosistema asociado, deben tener la facultad de representación del bosque ante las cortes u otro organismo público o privado en donde deberán representar el interés superior del bosque desvinculado de su utilidad para el ser humano. Asimismo, se les debe reconocer la facultad de promoción y defensa de los derechos, el bienestar y la salud del bosque y su ecosistema. Además, se deben establecer facultades para desarrollar su plan de manejo y tener poder de participación y de decisión en actos, proyector o programas que puedan afectar directa o indirectamente al bosque y en todo otro proceso relevante para el bosque
- 3.56 Por lo expuesto se solicita respetuosamente a esta Honorable Corte, no solo incluir en este proceso al Señor Defensor del Pueblo de la República del Ecuador para que actúe en representación de la naturaleza como sujeto de derechos, de acuerdo a sus facultades reconocidas por ley, sino que además ordene la creación de un organismo autónomo que actúen en nombre del bosque, su ecosistema y ríos asociado velando por la promoción de lo que es bueno para el bosque y los ríos en sí mismo, su salud y su bienestar desligado de su relación con los seres humanos, teniendo como principio fundamental el interés superior del bosque y el respeto y la garantía de sus derechos fundamentales.

#### **4. APLICACIÓN DEL PRINCIPIO DE PRECAUCIÓN**

- 4.1 La aprobación del proyecto minero en un bosque protector omite aplicar el principio de precaución establecido en la Constitución de la República del Ecuador, la cual

declara firmemente la importancia de aplicar el principio de precaución a todos los casos que llevan el riesgo de impactos ambientales. El artículo 73 dice que el Estado “aplicará medidas de precaución y restricción para las actividades que puedan conducir a la extinción de especies, la destrucción de ecosistemas o la alteración permanente de los ciclos naturales.”

- 4.2 Asimismo, el artículo 395, número 4, dice que “[e]n caso de duda sobre el alcance de las disposiciones legales en materia ambiental, éstas se aplicarán en el sentido más favorable a la protección de la naturaleza.” Subrayando este mandato, el artículo 396 mantiene que “[e]n caso de duda sobre el impacto ambiental de alguna acción u omisión, aunque no exista evidencia científica del daño, el Estado adoptará medidas protectoras eficaces y oportunas.” Este principio de precaución no puede ser separado de todo el sistema de aprobación de los estudios de impacto o registros ambientales que concede el Ministerio del Ambiente. Nuevamente, nos queda preguntarnos por qué no se aplicó el principio de precaución para proteger un Bosque Protector Los Cedros.
- 4.3 En este caso, es claro el Estado no ha tomado en consideración la evidencia incontrovertible de que las concesiones “Magdalena 01” y “Magdalena 02” a la Empresa Nacional Minera (ENAMI) están en gran parte dentro del Bosque Protector Los Cedros, y que el propuesto proyecto minero dañaría significativamente la biodiversidad y los ecosistemas frágiles y complejos del bosque protector. El Estado violó su deber de aplicar el principio de precaución en el proceso de otorgar registros ambientales bajo la Constitución de la República de Ecuador. El informe catastral de las concesiones “Magdalena 01” y “Magdalena 02” que acompañaron el registro ambiental reconoce que el área solicitada se encontró superpuesta por una área protegida - el Bosque Protector Los Cedros. Además, la Dirección de Gestión Ambiental del GAD Municipal de Santa Ana de Cotacachi concluyó por su inspección del situ que el proyecto minero infligiría graves daños en el bosque protector. Un técnico del municipio y especialista de ambiente, higiene, salubridad del GADMSAC también reportó que existían huellas de oso andino u oso de anteojos, una especie de gran importancia para la conservación de otras especies vegetales que está catalogada en peligro de extinción.
- 4.4 A pesar de esta abundante información sobre el valor de Los Cedros y los grandes riesgos que plantea la actividad extractiva solicitada por ENAMI a la flora y fauna de esta zona, el Ministerio de Minería otorgó la concesión de minerales metálicos “Río Magdalena 01” a favor de ENAMI en el 03 de marzo de 2017, y el señor Ministro del Ambiente otorgó el registro ambiental el 12 de diciembre de 2017. El gobierno extendió permiso al Proyecto Minero Río Magdalena en fase de exploración inicial en minería dentro del área protegida Bosque Protector Los Cedros, sin importar la perpetración de los principios constitucionales que le correspondían ejercer al Estado o la violación de los derechos de la naturaleza y del público general. La razón por la cual se requiere un registro ambiental por el Ministerio del Ambiente, conforme con un estudio de impacto ambiental, como requisito antes de emprender actividades que involucren un impacto ambiental es para que el gobierno pueda asegurar que sean respetados los derechos de todos los sujetos posiblemente afectados por un proyecto solicitado. El bosque Los Cedros alberga una gran biodiversidad con más de 350 especies de aves, 180 especies de orquídeas, 600 especies de polillas, y es el refugio de las últimas poblaciones del mono araña cabeza café, lo cual está en estado crítico de conservación. Este nivel

de biodiversidad requiere a la vez un alto nivel de precaución y un fuerte derecho a la restauración, como explicamos abajo. Al haber aprobado el estudio de impacto y el plan de manejo ambiental de ENAMI, incluso con el beneficio de los informes técnicos y especializados del proyecto, equivale a un abandono imprudente de la responsabilidad gubernamental y la violación de la constitución de Ecuador.

- 4.5 Como hemos mostrado, Ecuador reconoce constitucionalmente los derechos de la naturaleza, y su jurisprudencia ha hecho aplicación expresa de los principios inversión de la carga de la prueba, el principio in dubio pro-natura y el principio precautorio. La Acción de Protección por Violación de los Derechos del río Blanco dictada por Corte Provincial de Pichincha es un claro ejemplo de esta aplicación. Se tomó el principio de precaución afirmándose que cuando exista amenaza a la naturaleza no se debe esperar tener estudios exhaustivos para tomar medidas para evitar daños.
- 4.6 El carácter consuetudinario del principio de precaución como norma en el derecho internacional se evidencia en múltiples instrumentos legales que se aplican directamente a este caso, incluyendo el Convenio sobre la Diversidad Biológica, el Convenio Marco de las Naciones Unidas sobre el Cambio Climático, el Convenio de Estocolmo sobre Contaminantes Orgánicos Persistentes, y otros. instrumentos normativos que observan el principio de precaución como máximo referente para garantizar la protección de la naturaleza y el medio ambiente cuando no existe certeza científica de daño ambiental. El artículo 15 de la Declaración de Río sobre Medio Ambiente y Desarrollo reconoce el principio de precaución y lo define de la siguiente manera: “Cuando existe peligro de daño grave o irreversible, la falta de certeza científica absoluta no debe utilizarse como motivo para posponer la adopción. de medidas rentables para prevenir la degradación ambiental.” En este mismo sentido, la Corte Interamericana de Derechos Humanos (CIDH), en Opinión Consultiva OC-23/17 de 15 de noviembre de 2017, declara que los Estados deben actuar de acuerdo con el principio de precaución ante posibles daños graves o irreversibles al medio ambiente, incluso en ausencia de certeza científica. La Corte señaló que como “frecuentemente no es posible restaurar la situación existente antes de la ocurrencia de un daño ambiental, la prevención debe ser la política principal respecto a la protección del medio ambiente.” También observó que “[d]iversos Estados miembros de la OEA, por medio de su normatividad interna y la jurisprudencia de sus más altos tribunales, han incorporado el principio de precaución[.]” incluso Antigua y Barbuda, Argentina, Canadá Colombia, Cuba, Ecuador, México, Perú, República Dominicana y Uruguay.
- 4.7 En esta línea, la Corte Constitucional de Colombia explica lo siguiente: "El principio de precaución se erige como una herramienta jurídica de gran importancia, en tanto responde a la incertidumbre técnica y científica que muchas veces se cierne sobre las cuestiones ambientales, por la inconmensurabilidad de algunos factores contaminantes, por la falta de sistemas adecuados de medición o por el desvanecimiento del daño en el tiempo.”<sup>20</sup> No obstante, partiendo de que ciertas afectaciones resultan irreversibles, este principio señala un derrotero de acción que “no sólo atiende en su ejercicio a las consecuencias de los actos, sino que principalmente exige una postura activa de anticipación, con un objetivo de previsión de la futura situación medioambiental a efectos de optimizar el entorno de vida natural. Es decir, en base a la incertidumbre existente respecto del daño

---

<sup>20</sup> Corte Constitucional de Colombia, Sala Sexta de Revisión, Acción de tutela del Río Atrato, T-622 de 2016, 10 de noviembre, 2016, par. 7.36, p.101.

ambiental efectivo que se producirá en el bosque protector Los Cedros por el otorgamiento de la concesión minera, a fin de optimizar la protección ambiental, es necesario que se tomen medidas efectivas que garanticen la protección de dicho ecosistema.

- 4.8 Además, el fin último de la declaratoria de bosque protector es justamente garantizar la conservación de la biodiversidad existente en dicha área, por lo que debe precautelarse de manera inmediata la protección y conservación de este Bosque Protector. En este sentido, cabe resaltar que el Ministerio de Ambiente es la institución estatal encargada de la política ambiental en el Ecuador y es la autoridad que debe emprender los mecanismos, acciones, entre otras, que permitan efectivizar la protección y tutela cuando se produce daño al ambiente y a la Naturaleza. Es así que, la no aplicación de este principio de precaución al momento de otorgar dichas concesiones implica la responsabilidad de omisión por parte de la autoridad ambiental.
- 4.9 La jurisprudencia ecuatoriana puede ilustrar a la Honorable Corte en el presente caso sobre el principio de precaución aplicables en derecho ambiental comparado respecto de la realización adecuada de los derechos de la naturaleza, el cumplimiento de los tratados internacionales suscritos y ratificados por Ecuador, los mandatos de la Corte IDH, y el respeto de la propia constitución y legislación ecuatoriana en cuanto a sus obligaciones respecto al medio ambiente y los derechos humanos. Destacamos la importancia de las sentencias y la aplicación de los principios de la inversión de la carga de la prueba, el principio in dubio pro-natura y el principio precautorio.

## **5. DERECHO A LA CONSULTA CIUDADANA**

- 5.1 La Constitución de la República del Ecuador en su art. 1 establece que:

“El Ecuador es un Estado constitucional de derechos y justicia, social, democrático, soberano, independiente, unitario, intercultural, plurinacional y laico. Se organiza en forma de república y se gobierna de manera descentralizada. La soberanía radica en el pueblo, cuya voluntad es el fundamento de la autoridad, y se ejerce a través de los órganos del poder público y de las formas de participación directa previstas en la Constitución. Los recursos naturales no renovables del territorio del Estado pertenecen a su patrimonio inalienable, irrenunciable e imprescriptible. [...]”

- 5.2 En particular, como mecanismo de participación y expresión de voluntad ciudadana, la Constitución de la República del Ecuador reconoce el derecho de la consulta previa en los artículos 398 (Consulta ciudadana) y 57.7 ( consulta previa, libre e informada).
- 5.3 Por su parte, el artículo 398 de la Constitución establece:

*“Toda decisión o autorización estatal que pueda afectar al ambiente deberá ser consultada a la*

*comunidad, a la cual se informará amplia y oportunamente.* El sujeto consultante será el Estado. La ley regulará la consulta previa, la participación ciudadana, los plazos, el sujeto consultado y los criterios de valoración y de objeción sobre la actividad sometida a consulta. El Estado valorará la opinión de la comunidad según los criterios establecidos en la ley y los instrumentos internacionales de derechos humanos. Si del referido proceso de consulta resulta una oposición mayoritaria de la comunidad respectiva, la decisión de ejecutar o no el proyecto será adoptada por resolución debidamente motivada de la instancia administrativa superior correspondiente de acuerdo con la ley”. En este caso la decisión o autorización estatal es el registro ambiental pues se trata de una decisión administrativa que emite la Autoridad Ambiental y que debió ser consultada previamente con las comunidades afectadas.

- 5.4 El artículo 57 de la Constitución de la República del Ecuador se refiere a los derechos colectivos y establece que “Se reconoce y garantizará a las comunas, comunidades, pueblos y nacionalidades indígenas, de conformidad con la Constitución y con los pactos, convenios, declaraciones y demás instrumentos internacionales de derechos humanos, los siguientes derechos colectivos.” [...], estableciendo en su numeral 7:

“La consulta previa, libre e informada, dentro de un plazo razonable, sobre planes y programas de prospección, explotación y comercialización de recursos no renovables que se encuentren en sus tierras y que puedan afectarles ambiental o culturalmente; participar en los beneficios que esos proyectos reporten y recibir indemnizaciones por los perjuicios sociales, culturales y ambientales que les causen. La consulta que deban realizar las autoridades competentes será obligatoria y oportuna. Si no se obtuviese el consentimiento de la comunidad consultada, se procederá conforme a la Constitución y la ley.”

En el caso en comento, esto se refiere a la consulta ciudadana ya que según la sentencia de primera instancia no existen pueblos indígenas cuyos derechos hayan sido conculcados en las afectaciones al Bosque Los Cedros.

- 5.5 Además, volvemos a citar al artículo 11 de la Constitución que es claro acerca de la aplicación directa de los derechos y la necesidad de que ninguna norma limite estos derechos, cuando manifiesta:

El ejercicio de los derechos se regirá por los siguientes principios:

3. Los derechos y garantías establecidos en la Constitución y en los instrumentos internacionales de derechos humanos serán de directa e inmediata aplicación por y ante cualquier servidora o servidor público, administrativo o judicial, de oficio o a petición de parte.

Para el ejercicio de los derechos y las garantías constitucionales no se exigirán condiciones o requisitos que no estén establecidos en la Constitución o la ley.

Los derechos serán plenamente justiciables. No podrá alegarse falta de norma jurídica para justificar su violación o desconocimiento, para desechar la acción por esos hechos ni para negar su reconocimiento.

4. Ninguna norma jurídica podrá restringir el contenido de los derechos ni de las garantías constitucionales [...].

- 5.6 La consulta ambiental es una expresión del derecho a participar en asuntos ambientales, establecido a nivel internacional en el principio 10 de la Declaración de Río, lo cual establece que “el mejor modo de tratar las cuestiones ambientales es con la participación de todos los ciudadanos interesados, en el nivel que corresponda. En el plano nacional, toda persona deberá tener acceso adecuado a la información sobre el medio ambiente de que dispongan las autoridades públicas, incluida la información sobre los materiales y las actividades que encierran peligro en sus comunidades, así como la oportunidad de participar en los procesos de adopción de decisiones. Los Estados deberán facilitar y fomentar la sensibilización y la participación de la población poniendo la información a disposición de todos. Deberá proporcionarse acceso efectivo a los procedimientos judiciales y administrativos, entre éstos el resarcimiento de daños y los recursos pertinentes”. Este principio está finalizado a garantizar que toda persona pueda tener acceso a la información adecuada, participar en la toma de decisiones y acceder a la justicia en asuntos ambientales, con el objetivo último de asegurar el derecho de las generaciones presentes y futuras a un medio ambiente sano y sostenible.
- 5.7 De hecho, el numeral 3 del art. 398 de la CRE entra en el contexto más amplio del art. 395, lo cual establece que “La Constitución reconoce los siguientes principios ambientales: “El Estado garantizará la participación activa y permanente de las personas, comunidades, pueblos y nacionalidades afectadas, en la planificación, ejecución y control de toda actividad que genere impactos ambientales.”
- 5.8 En el presente caso, según lo que se desprende de la Resolución mediante la cual el Ministro del Ambiente otorgó el Registro Minero a favor de la Empresa Nacional Minera (ENAMIEP), ni la población misma ni los habitantes de las comunas de la parroquia de García Moreno que se encuentran asentadas en el área de influencia directa e indirecta de las concesiones mineras Río Magdalena 01 y Río Magdalena 02, tampoco la población de la Zona de Intag y del cantón Cotacachque, fueron consultadas previamente a la concesión del registro ambiental para determinar si el proyecto minero era viable o no.

- 5.9 En el año 2010, la Corte Constitucional del Ecuador, en su sentencia N° 001-10-SIN-CC, sobre la Inconstitucionalidad de la Ley de Minería, resolvió el literal b del numeral 3 que: “Toda actividad minera que se pretenda realizar en los territorios (con énfasis) de las comunidades, pueblos y nacionalidades indígenas, afroecuatorianos y montubias, en todas sus fases (con énfasis), a partir de la publicación de la presente sentencia, deberá someterse al proceso de consulta previa establecido en el artículo 57, numeral 7 de la Constitución, en concordancia con las reglas establecidas por esta Corte (con énfasis), hasta tanto la Asamblea Nacional expida la correspondiente ley ”. A partir de la publicación de la sentencia de la Corte Constitucional en el Registro Oficial N° 176 de 21 de abril del 2010, el Estado ecuatoriano está obligado a realizar la consulta previa, libre e informada de acuerdo con los parámetros contenidos y desarrollados en esta sentencia, así como también, en los parámetros y tratados internacionales de Derechos Humanos.
- 5.10 La Corte Interamericana de Derechos Humanos, en su Opinión Consultiva OC-23/17, de 15 de noviembre de 2017, solicitada por la República de Colombia Medio Ambiente y Derechos Humanos, la Corte IDH al respecto del derecho a la Consulta Ambiental señaló que todas las personas tienen derecho a participar de la toma de decisiones en proyectos o actividades que puedan afectar al medio ambiente porque menoscabarían otros derechos como la vida, entre otros. La Corte IDH señaló que es importante la participación pública para ejercer el control democrático de las gestiones estatales y así pueden cuestionar, indagar y considerar el cumplimiento de las funciones públicas, mediante la aplicación de los principios de publicidad y transparencia y, sobre todo, debe ser respaldado por el acceso a la información que permite el control social mediante una participación efectiva y responsable. Así también el Estado debe garantizar oportunidades para la participación efectiva desde las primeras etapas del proceso de adopción de decisiones e informar al público sobre estas oportunidades de participación. Señaló además que el Estado debe asegurarse que los miembros del pueblo tengan conocimiento de los posibles riesgos, incluidos los riesgos ambientales y de salubridad, para que puedan opinar sobre cualquier proyecto que pueda afectar su territorio dentro de un proceso de consulta con conocimiento y de forma voluntaria. Por lo tanto, el Estado debe generar canales de diálogo sostenido, efectivo y confiable.
- 5.11 Con respecto a asuntos ambientales, la participación representa un mecanismo para integrar las preocupaciones y el conocimiento de la ciudadanía en las decisiones de políticas públicas que afectan al medio ambiente. Asimismo, la participación en la toma de decisiones aumenta la capacidad de los gobiernos para responder a las inquietudes y demandas públicas de manera oportuna, construir consensos y mejorar la aceptación y el cumplimiento de las decisiones ambientales.
- 5.12 Por lo expuesto, respetuosamente solicitamos a esta Honorable Corte que se respete el derecho a la consulta ciudadana en aspectos ambientales y se ordene al Ministerio de Minería y al Ministerio del Ambiente que antes de cualquier decisión estatal se realicen consultas ciudadanas. En este caso, nos referimos a dos decisiones estatales, en cuyos procesos de aprobación se omitió la realización de la consulta: 1) Ministerio de Minería que otorgó la concesión de minerales metálicos “Río Magdalena 01” a favor de ENAMI el 03 de marzo de 2017; y, 2) y el señor ministro del Ambiente que otorgó el Registro Ambiental el 12 de diciembre de 2017.

## **6. EL ESTADO ECUATORIANO TIENE EL DEBER DE PROTEGER EL MEDIO AMBIENTE A FIN DE PROTEGER LAS NECESIDADES Y LOS DERECHOS DE LAS FUTURAS GENERACIONES**

- 6.1 A través de este escrito hemos repasado la importancia de los bosques respecto a rol en la mitigación del cambio climático. En consecuencia, su protección y la garantía de sus derechos fundamentales es crucial a fin de responder a los objetivos de la Convención Marco de las Naciones Unidas sobre el Cambio Climático establecido en el artículo 5 en que se señala “Las Partes deberían adoptar medidas para conservar y aumentar, según corresponda, los sumideros y depósitos de gases de efecto invernadero a que se hace referencia en el artículo 4, párrafo 1 d), de la Convención, incluidos los bosques.” Earth Law Center entiende que el respeto y garantía de los derechos de la naturaleza son un aspecto fundamental en vista de proteger y conservar los bosques de la nación.
- 6.2 Una de las dimensiones fundamentales acerca de por qué es absolutamente indispensable dar una respuesta urgente al cambio climático y la crisis medioambiental global es en vista de proteger los derechos a un medio ambiente sano de las futuras generaciones, a fin de que ellos satisfacer sus propias necesidades y se les pueda garantizar sus derechos fundamentales.
- 6.3 En el derecho internacional los derechos de las generaciones futuras han sido reconocidos en diversos instrumentos dentro de los cuales podemos mencionar, la resolución 44/228 de la Asamblea General del 22 diciembre de 1989, relativa a la Conferencia de las Naciones Unidas sobre el Medio Ambiente y el Desarrollo, además de las Resoluciones 43/53 del 6 diciembre de 1988, la 44/207 del 22 diciembre de 1989, la 45/212 del 21 diciembre de 1990, y la 46/169 del 19 diciembre de 1991; todas estas orientadas a la protección del clima mundial para las generaciones presentes y futuras. Asimismo, podemos mencionar, la Declaración de Río de Janeiro, conocida también como "Cumbre de la Tierra", estableció en el principio 3 que "El derecho al desarrollo debe ejercerse en forma tal que responda equitativamente a las necesidades de desarrollo y ambientales de las generaciones presentes y futuras" (Declaración de Río de Janeiro, 1992). En definitiva, son numerosos los reconocimientos que poseen las generaciones futuras en cuanto a la garantía de protección del ambiente por parte de los habitantes del presente.
- 6.4 En el Derecho comparado es posible encontrar antecedentes de decisiones judiciales que consideran el derecho de las futuras generaciones. Es el caso de la Corte Suprema Colombiana en la decisión que reconoce derechos de la Amazonía Colombiana STC4360-2018<sup>21</sup> sostuvo; “El fundamento de la obligación de solidaridad directa con la naturaleza se edifica en un valor, en sí mismo, de ésta, por afinidad con el sujeto cognoscente u “objeto” externo por el que se define, por cuanto el ser humano “forma parte de la naturaleza “siendo”, a su vez, naturaleza. Esta concepción es la esencia principal sobre la que se asienta el concepto de valor intrínseco del ambiente: el respeto a sí mismo implica, de suyo, “el respeto a la parte de sí mismo que está compuesta por la naturaleza, y de la que formarán parte, a su vez, las futuras generaciones.”

---

<sup>21</sup> Corte Suprema de la República de Colombia, STC4360-2018, 5 de abril 2018.



- 6.5 Sin embargo, una de las decisiones más célebres respecto al reconocimiento de los derechos de las futuras generaciones tuvo lugar en Filipinas en donde el abogado Antonio Oposa, en nombre de sus tres hijos y 41 niños más, interpuso una demanda en representación de su generación y de las venideras en defensa del derecho a un medio ambiente sano, debido a la deforestación de bosques vírgenes que estaban siendo sometidos a la explotación comercial. La querella alegaba que sólo quedaban 800.000 hectáreas de bosques vírgenes y que estaban siendo sometidos a explotación comercial. También alegaron que el gobierno ya había otorgado 92 licencias de explotación forestal que abarcaban un área de 3,9 millones de hectáreas, un hecho definido como un gran abuso de criterio. Con una tasa de deforestación en el país estimada en 120.000 hectáreas por año, la reserva de 800.000 hectáreas de bosque virgen desaparecería totalmente en menos de diez años.<sup>22</sup> Por ello, no quedaría nada para que los niños querellantes dispusieran, disfrutaran y se beneficiaran cuando les llegara el momento. La Corte Suprema de Filipinas, en el que sostuvo; “la defensa de su derecho a un medio ambiente sano por parte de los menores constituye, al mismo tiempo, el cumplimiento de su obligación de asegurar la protección de ese derecho para las futuras generaciones y fue así que en un caso similar al planteo presente se reconoció la legitimación de niñas y niños en nombre de las generaciones futuras para evitar la deforestación de la isla.”<sup>23</sup> Las similitudes con el caso en comento en este amicus invita a esta Honorable Corte a proteger el bosque protector los cedros, su ecosistema y ríos.
- 6.6 Asimismo, la misma Constitución de la República de Ecuador reconoce expresamente el derecho a las futuras generaciones en el artículo 395 en un número 1 el cual señala

La Constitución reconoce los siguientes principios ambientales:

1.El Estado garantizará un modelo sustentable de desarrollo, ambientalmente equilibrado y respetuoso de la diversidad cultural, que conserve la biodiversidad y la capacidad de regeneración natural de los ecosistemas, y *asegure la satisfacción de las necesidades de las generaciones presentes y futuras.*

- 6.7 En vista de lo antes expuesto, se solicita a esta Corte considerar proteger el bosque protector Los Cedros y su ecosistema a fin de resguardar el derecho de las futuras generaciones a un medioambiente sano y el efectivo acceso y goce de los derechos humanos.

## 7. SOLICITUDES

- 7.1 Por lo expuesto anteriormente, los firmantes de este amicus curiae solicitamos respetuosamente a esta Honorable Corte, que en el marco de los tratados internacionales, la Constitución y leyes de la República del Ecuador:
1. Se garantice los derechos de la naturaleza, estos son: derecho a la existencia, el mantenimiento y regeneración de sus ciclos vitales, estructura, funciones y

<sup>22</sup> OPOSA, Antonio (1997). «The Power to Protect the Environment».

<sup>23</sup> Oposa et al contra Facturan et al., 224 SCRA 792, 1993: 804-5

procesos evolutivos del bosque protector de Los Cedros y de los ríos Manduriacu, Verde, los Cedros y río Magdalena conforme lo establece el art. 71 de la Constitución Ecuatoriana.

2. Que respecto de los ríos Manduriacu, Verde, los Cedros y río Magdalena se reconozca y se establezca mecanismo para garantizar y respetar los derechos fundamentales específicos : (1) El derecho al flujo, (2) El derecho a ejercer sus funciones esenciales con el ecosistema, (3) El derecho a estar libre de toda contaminación, (4) El derecho a alimentar y ser alimentado por sus afluentes, (5) El derecho a biodiversidad nativa, y (6) El derecho a la restauración.
3. Se garantice el derecho a la restauración del bosque protector Los Cedros exigiendo a la ENAMI que se proceda a la inmediata restauración del bosque, cierre de los caminos aperturados y reparación de todos los daños realizados en el bosque protector respetando así el artículo 72 de la Constitución de la República del Ecuador.
4. Ordene, a la autoridad respectiva, la creación de un organismo autónomo que actúen en nombre del bosque, su ecosistema y ríos asociados velando por la promoción de lo que es bueno para el bosque y los ríos en sí mismo, su salud y su bienestar desligado de su relación con los seres humanos, teniendo como principio fundamental el interés superior del bosque y el respeto y la garantía de sus derechos fundamentales.
5. Se ordene al Ministerio del Ambiente proteja los derechos de la naturaleza, aplique el principio de precaución exigiendo el otorgamiento de licencias ambientales y no solamente registros ambientales para operaciones mineras dentro de bosques protectores. Y se ordene asimismo al Ministerio del Ambiente reformar toda la normativa secundaria que se requiera, así como el sistema informático denominado Sistema Único de Información Ambiental, SUIA pues los derechos son directamente aplicables y ninguna norma debe obstaculizar su aplicación. Así lo manda el artículo 11, numeral 3 y 4 de la Constitución ecuatoriana.
6. Se garantice el respeto a la consulta ciudadana establecida en el artículo 398 de la Constitución de la República del Ecuador en torno a dos de las decisiones estatales llevadas sin ningún proceso de consulta. Estas decisiones son: 1) Ministerio de Minería que otorgó la concesión de minerales metálicos “Río Magdalena 01” a favor de ENAMI el 03 de marzo de 2017; y, 2) y el señor Ministro del Ambiente que otorgó el Registro Ambiental el 12 de diciembre de 2017.

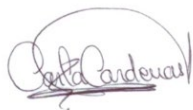

---

**CARLA CÁRDENAS**

Abogada Voluntaria, Earth Law Center (Licencia #8388 C.A.P)



---

**ANDREA FOLDS**

Consejera Legislativa,  
Earth Law Center



---

**SARA LORENZINI**  
Voluntaria, Earth Law Center



---

**VANESSA SCHAEFFER**  
Legal Intern, Earth Law Center



---

**CONSTANZA PRIETO FIGELIST**  
Latin American Legal Lead, Earth Law Center



---

**GRANT WILSON**  
Executive Director, Earth Law Center



---

**CORMAC CULLINAN**  
Executive Committee Member  
Global Alliance for the Rights of Nature



---

**SARAH UHLEMANN**  
Senior Attorney & International Program Director  
Centro para la Diversidad Biológica



---

**MONTI AGUIRRE**  
Latin American Program Coordinator, International Rivers



---

**NOAH D. HALL**

Professor of Law, Wayne State University Law School  
Scholarship Director, Great Lakes Environmental Law Center

**PROFESORES DE DERECHO QUE FIRMAN EL DOCUMENTO\*\***

\*\* Los distinguidos profesores firmantes, lo hacen en su nombre propio y no en nombre las instituciones educativas de las que son miembros:

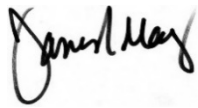

---

**JAMES R. MAY, ESQ.**

Distinguished Professor of Law  
Founder, Global Environmental Rights Institute  
Widener University Delaware Law School



---

**ERIN DALY**

Professor of Law, Delaware Law School  
Executive Director, Dignity Rights International  
Director, Global Network for Human Rights and the Environment

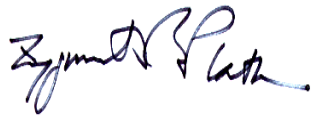

---

**ZYGMUNT PLATER**

Professor of Law, Boston College School of Law

**OLIVER A. HOUCK**

Tulane Law School  
ohouck@tulane.edu

## **ANEXOS**

1. Carta de Científicos al Tribunal Constitucional de Ecuador. “Caso legal sobre los Derechos de la Naturaleza en Ecuador podría sentar un precedente mundial para los bosques durante esta emergencia climática y de biodiversidad.”
2. Carta del Dr. Mika Peck, Profesor Titular de Biología, School of Life Sciences, University of Sussex.” El mono araña de cabeza café: "Embajador" de la naturaleza.
3. David F. Díaz Fernández, Punto Focal Corregional de KBA para América Latina y el Caribe. El Bosque Protector Los Cedros como un Área Clave de Biodiversidad.

## **Caso legal sobre los Derechos de la Naturaleza en Ecuador podría sentar un precedente mundial para los bosques durante esta emergencia climática y de biodiversidad**

Estimados señores,

El máximo tribunal de Ecuador, el Tribunal Constitucional, acordó conocer un caso sobre los Derechos de la Naturaleza para la Reserva Forestal Protegida Los Cedros, en contra de concesiones mineras que fueron otorgadas ilegalmente por el gobierno en 2017, en un área de 2.4 millones de hectáreas (seis millones de acres), incluyendo 186 bosques protegidos. Este caso tiene implicaciones para la emergencia climática, así como para la asombrosa biodiversidad, que incluye cientos de especies en peligro de extinción.

En el 2000, se estimó que más del 96% de los bosques en el oeste de Ecuador habían sido deforestados<sup>1</sup>, y se ha perdido más desde entonces, y ahora las pocas áreas protegidas que quedan están amenazadas. La minería representa una inversión a corto plazo con grandes costos a largo plazo para el pueblo de Ecuador. No podemos mantener la ilusión de que la minería puede realizarse sin graves consecuencias ecológicas y para la salud humana; consecuencias que están bien documentadas en la literatura científica<sup>2-9</sup>. Además, a medida que el clima cambia y los recursos hídricos en todo el mundo se ven cada vez más presionados, las cuencas hidrográficas no taladas como la de la Reserva Los Cedros y los demás bosques protegidos son, en consecuencia, preciosas.

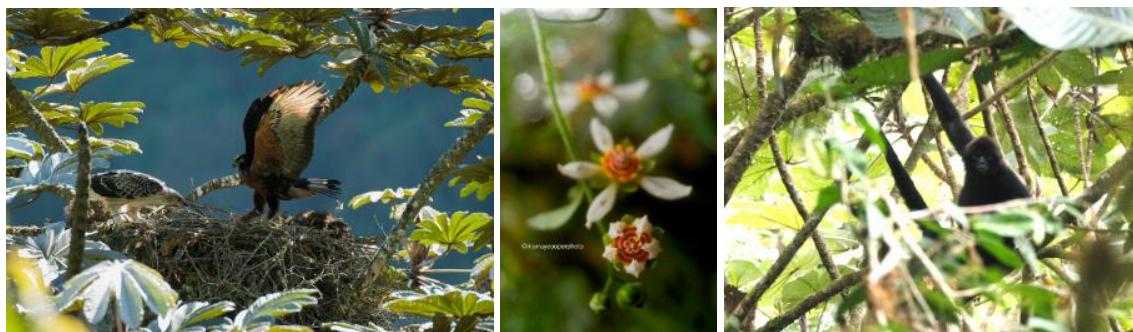

Tres especies en peligro crítico de extinción en Ecuador y residentes en la Reserva Los Cedros, el águila negra y castaña (©murraycooperphoto), la planta Nasa aequatoriana (©murraycooperphoto) y el mono araña de cabeza marrón (*Ateles fusciceps fusciceps*) (©BittyRoy) .

Los Bosques Protectores en Ecuador albergan una biodiversidad excepcional, gran parte de la cual se está volviendo rara. Por ejemplo, la Reserva Los Cedros es bien conocida por sus monos araña de cabeza marrón en peligro crítico de extinción a nivel mundial,<sup>10,11</sup> y osos de anteojos en peligro de extinción<sup>12,13,13</sup> pero hay 207 especies en Los Cedros que están amenazadas según las listas rojas de Ecuador, incluidas 70 casi amenazadas, 103 vulnerables a la extinción, 29 en peligro de extinción y 5 en peligro crítico<sup>14-16</sup>. Además, la reserva abarca las cabeceras de cuatro ríos.

Nosotros, los científicos abajo firmantes, esperamos que Ecuador comprenda y aproveche esta oportunidad para honrar su compromiso con el mundo natural y con las generaciones futuras de ecuatorianos. Solicitamos específicamente que (1) todas las concesiones mineras sean retiradas de Bosques Protectores, incluida la Reserva Los Cedros y, (2) que la excepcional Reserva Los Cedros sea incluida en el Parque Nacional, Cotacachi-Cayapas, reserva ecológica con el que comparte frontera.

Saludos cordiales,

Científicos preocupados por la protección de Los Cedros

|    | <b>Title</b>                     | <b>First Name</b> | <b>Last Name</b> | <b>Institution</b>                          |
|----|----------------------------------|-------------------|------------------|---------------------------------------------|
| 1  | Scientific illustrator           | Nathalie          | Aall             | The Biodiversity Group                      |
| 2  | Owner                            | Esther            | Aall             | lifepatternz.com                            |
| 3  | GIS Officer                      | Azalea Kamellia   | Abdullah         | WWF-Malaysia                                |
| 4  | Ecosystem Reclamation field tech | Lynea             | Aboumrad         | Trent university                            |
| 5  | Investigador asociado            | Néstor            | Acosta           | Centro Jambatu                              |
| 6  | Mr                               | Gilbert           | Adum             | SAVE THE FROGS! Ghana                       |
| 7  | former Collections Manager       | David             | Agro             | Academy of Natural Sciences of Philadelphia |
| 8  | Dr                               | Kaleem            | Ahmed            | Aligarh Muslim University Aligarh           |
| 9  | Professor                        | Resit             | Akcakaya         | Stony Brook University, New York, USA       |
| 10 | Research Professor               | Miquel            | Alcaraz          | Institute of <marine -sciences, CSIC        |
| 11 | Director                         | Brooke            | Aldrich          | Neotropical Primate Conservation            |
| 12 | Pro. Dr.                         | Christine         | Alewell          | University of Basel                         |
| 13 | Citizen Scientist                | Braden            | Alexander        | iNaturalist                                 |
| 14 | Ecologist (PhD)                  | Jaclyn            | Aliperti         | University of California, Davis             |
| 15 | Professor                        | Barbara           | Allen            | Virginia Tech University                    |
| 16 | Citizen scientist                | Josh              | Allen            | Inaturalist                                 |
| 17 | Bioquímica Farmaceutica          | Alexandra         | Almeida          | Acción Ecológica                            |
| 18 | Research Associate               | Miguel            | Alvarez          | University of Bonn                          |
| 19 | Ms.                              | Elsa              | Alvear           | Alvear Associates                           |
| 20 | PhD student                      | Luis              | Amador           | Universidad Austral de Chile                |
| 21 | Citizen scientist                | Justin            | Ambroise         | inaturalist                                 |
| 22 | Professor of organismic Biology  | Gabriel           | Ameka            | University of Ghana, Legon, Accra, GHANA    |
| 23 | PhD Candidate                    | Zachary           | Amir             | The University of Queensland                |
| 24 | PhD Student                      | Zachary           | Amir             | The University of Queensland                |
| 25 | Professor Emeritus               | Fred              | Anapol           | University of Wisconsin-Milwaukee           |
| 26 | Associate Professor              | Jill              | Anderson         | University of Georgia                       |
| 27 | Scientist                        | Liana             | Anderson         | CEMADEN                                     |
| 28 | Citizen scientist                | Bryce             | Anderson         | INaturalist                                 |
| 29 | PhD                              | Paulina           | Andrade          | University of California, Berkeley          |
| 30 | Director                         | Brad              | Andrews          | Global Conservation Associates              |
| 31 | Veterinary Records Assistant     | Bridget           | Angell           | Auckland Zoo                                |
| 32 | Co-Chair                         | Ariadne           | Angulo           | IUCN SSC Amphibian Specialist Group         |
| 33 | Postdoctoral Fellow              | Daniel            | Anstett          | University of British Columbia              |
| 34 | Dr.                              | Alexander         | Antonarakis      | University of Sussex                        |
| 35 | PhD Candidate                    | Lina              | Aoyama           | University of Oregon                        |
| 36 | Professor of Biology             | Brian             | Arbogast         | University of North Carolina Wilmington     |

Científicos preocupados por la protección de Los Cedros

|    |                                                              |           |                 |                                                              |
|----|--------------------------------------------------------------|-----------|-----------------|--------------------------------------------------------------|
| 37 | associate technical researcher                               | Inty      | Arcos           | CONDESAN                                                     |
| 38 | Restoration Ecologist                                        | Alys      | Arenas          | Newport Bay Conservancy                                      |
| 39 | Coordinator for lower Amazon Program, Perú, Colombia, Brazil | Daniel    | Aristizabal     | Amazon Conservation Team                                     |
| 40 | Conservation Biologist                                       | Yamila    | Arjona          | Asociación Faunatura                                         |
| 41 | Dr                                                           | William   | Arlidge         | University of Oxford                                         |
| 42 | Professor of Ecology & Evolution                             | William   | Armbruster      | University of Portsmouth                                     |
| 43 | Senior Lecturer                                              | Saurabh   | Arora           | University of Sussex                                         |
| 44 | Founder/Managing Director                                    | Edward    | Aruna           | Reptile and Amphibian Program - Sierra Leone                 |
| 45 | Biologist                                                    | Pablo     | Ascencio        | Entreflores                                                  |
| 46 | Life Sciences                                                | Carl      | Ashworth        | Auckland Zoo                                                 |
| 47 | Director of Bird Conservation                                | Jon       | Atwood          | Mass Audubon                                                 |
| 48 | Research Technician & Masters Student                        | Vinci     | Au              | University of British Columbia                               |
| 49 | Dr                                                           | Dominique | Auderset        | University Geneva                                            |
| 50 | Assoc. Res. Prof. Wildlife Conservation                      | Julian    | Avery           | Penn State University                                        |
| 51 | Professor                                                    | Leticia   | Aviles          | Biodiversity Research Centre, University of British Columbia |
| 52 | Master in Environmental Studies                              | Marisol   | Ayala           | York University                                              |
| 53 | Professor of Biological Sciences                             | Matthew   | Ayres           | Dartmouth College                                            |
| 54 | Mr.                                                          | Cesar     | Ayres           | AHE                                                          |
| 55 | Prof. of Biology                                             | Eric      | Baack           | Luther College                                               |
| 56 | Assistant Professor                                          | Selene    | Baez            | Escuela Politécnica Nacional del Ecuador                     |
| 57 | research assistant                                           | Graham    | Bailes          | University of Oregon                                         |
| 58 | ENV2                                                         | Phillip   | Bailey          | VHB                                                          |
| 59 | Assistant Professor                                          | Sarah     | Baker           | McNeese State University                                     |
| 60 | Dr                                                           | Karis     | Baker           | Durham university, UK                                        |
| 61 | Manager International Conservation                           | Chris     | Banks           | Zoos Victoria, Australia                                     |
| 62 | MSc                                                          | Ninda     | Baptista        | ISCED                                                        |
| 63 | Researcher                                                   | Luis      | Baquero         | Universidad de las Americas                                  |
| 64 | Executive Director                                           | Margarita | Baquero         | NGO in Ecuador                                               |
| 65 | Research technician                                          | Sergio    | Baraibar Molina | ISGlobal                                                     |
| 66 | Assistant Professor of Biology                               | Matt      | Barber          | University of Oregon                                         |
| 67 | Animal Curator                                               | Diane     | Barber          | Zoological facility in Texas                                 |
| 68 | Affiliate Full Professor                                     | Phoebe    | Barnard         | University of Washington                                     |
| 69 | Senior Scientist                                             | Mark      | Barone          | Population Council                                           |



Científicos preocupados por la protección de Los Cedros

|     |                                          |                  |              |                                                                |
|-----|------------------------------------------|------------------|--------------|----------------------------------------------------------------|
| 70  | MSc                                      | María Elena      | Barragan     | FHGO                                                           |
| 71  | Desert Tortoise Biologist                | Jonathan         | Barratt      | Core Data                                                      |
| 72  | Emeritus University Professor            | Spencer          | Barrett      | University of Toronto                                          |
| 73  | Executive Coordinatoe                    | Yara             | Barros       | PROJETO ONCAS DO IGUACU                                        |
| 74  | PhD                                      | David            | Bauman       | University of Oxford - School of Geography and the Environment |
| 75  | Citizen Scientist                        | Samuel           | Baxter-Bray  | Inaturalist                                                    |
| 76  | Senior fisheries ecologist               | William          | Beaumont     | Game & Wildlife Conservation Trust                             |
| 77  | Mr                                       | William Andrew   | Beaumont     | Game & Wildlife Conservation Trust                             |
| 78  | Associate                                | Daniel           | Beech        | GSDM                                                           |
| 79  | MSc in EcoSocial Regeneration            | Shaktari         | Belew        | Thrivability Institute (Thriv'In) and TransitionUS             |
| 80  | CEO                                      | Kevin            | Bell         | Lincoln Park Zoo                                               |
| 81  | Citizen scientist                        | MacKenzie        | Bell         | Inaturalist                                                    |
| 82  | Dr                                       | Elisa            | Berdalet     | Institute of Marine Sciences (ICM-CSIC)                        |
| 83  | Wildlife researcher                      | David And Judith | Berg         | Retired                                                        |
| 84  | Professor of Biology                     | Bradley          | Bergstrom    | Valdosta State University                                      |
| 85  | NA                                       | Anna             | Berry        | NA                                                             |
| 86  | Miss                                     | Catherine        | Bertrand     | Butterfly Conservation                                         |
| 87  | No                                       | Iván             | Betancourt   | No                                                             |
| 88  | Dr.                                      | Wouter           | Beukema      | Ghent University                                               |
| 89  | Professor                                | Martin           | Bidartondo   | Imperial College London                                        |
| 90  | Professor of Biology                     | Paulette         | Bierzychudek | Lewis & Clark College                                          |
| 91  | Principal Researcher                     | Olivia           | Bina         | University of Lisbon, Institue of Social Sciences              |
| 92  | Biologist                                | Thomas           | Bionda       | Apenheul Primate Park                                          |
| 93  | Professor of Zoology                     | Phillip          | Bishop       | University of Otago, New Zealand                               |
| 94  | Dr                                       | Bente            | Bjornholt    | University of Sussex                                           |
| 95  | Master's Student                         | Jarrett          | Blair        | University of British Columbia                                 |
| 96  | Dr.                                      | Quentin          | Blandenier   | University of Neuchâtel, Switzerland                           |
| 97  | Mtr                                      | Ailin            | Blasco       | PUCE                                                           |
| 98  | Citizen Scientist                        | Crystal          | Bliss        | INaturaliat                                                    |
| 99  | Assistant professor                      | Benjamin         | Blonder      | University of California Berkeley                              |
| 100 | Senior Lecturer in Conservation Medicine | Wayne            | Boardman     | The University of Adelaide                                     |
| 101 | MPA                                      | Andrzej          | Bodek        | City of Frankfurt (Main), Germany - Zoological Garden          |
| 102 | Professor                                | Laura            | Boggess      | Mars Hill University                                           |
| 103 | Professor                                | Carol            | Boggs        | University of South Carolina                                   |
| 104 | Professor                                | Luigi            | Boitani      | University of Roma Sapienza                                    |
| 105 | Member                                   | Scott            | Bolick       | NCHS                                                           |
| 106 | Environmental Scientist                  | Jonathon         | Bolton       | BGE, Inc                                                       |

Científicos preocupados por la protección de Los Cedros

|     |                                            |              |                  |                                                         |
|-----|--------------------------------------------|--------------|------------------|---------------------------------------------------------|
| 107 | Profesora Investigadora                    | Elisa        | Bonaccorso       | Universidad San Francisco de Quito                      |
| 108 | PhD Candidate                              | Amy          | Bonka            | UAB                                                     |
| 109 | DPhil researcher                           | Hollie       | Booth            | University of Oxford                                    |
| 110 | Professor                                  | Amael        | Borzee           | Nanjing Forestry University                             |
| 111 | Postdoctoral Fellow                        | Jean         | Boucher          | Arizona State University                                |
| 112 | Research Assistant                         | Kyle         | Boutin           | Everglades Wetland Research Park                        |
| 113 | Dr.                                        | Claudia      | Bove             | Museu Nacional - Universidade Federal do Rio de Janeiro |
| 114 | Professor and Head, Department of Biology  | Bruce        | Bowerman         | University of Oregon                                    |
| 115 | Citizen-Science and Education Director     | Stephanie    | Bowman           | The Biodiversity Group                                  |
| 116 | MSc Student                                | Isaiah       | Box              | University of British Columbia                          |
| 117 | Programme Coordinator (KBA Expert)         | Charlotte    | Boyd             | International Union for the Conservation of Nature      |
| 118 | Master of Science                          | Cecilia      | Boyd             | Southeastern Louisiana University                       |
| 119 | Wildlife Manager                           | John-Michael | Boyd             | ABAC                                                    |
| 120 | Associate Professor                        | Heather      | Bracken-Grissom  | Florida International University                        |
| 121 | PhD candidate                              | Sabrina      | Brando           | University of Stirling                                  |
| 122 | Assistant Professor                        | Eve          | Bratman          | Environmental Studies, Franklin and Marshall College    |
| 123 | Lecturer in field conservation and science | Timothy      | Bray             | Bristol Zoological Society                              |
| 124 | PhD student                                | Julius       | Bright Ross      | University of Oxford                                    |
| 125 | Ethnoprimatologist                         | Tamara       | Britton-Mendieta | The University of Western Ontario, Canada               |
| 126 | Dr, Lecturer in International Relations    | Andrea       | Brock            | University of Sussex                                    |
| 127 | Graduate teaching assistant                | Tyler        | Brock            | Southeastern Louisiana University                       |
| 128 | Prof of Veterinary Epidemiology            | Mark         | Bronsvoort       | Univesity of Edinburgh                                  |
| 129 | Director                                   | Koen         | Brouwer          | Maguari-One Zoo and Wildlife Consultants                |
| 130 | Professor (Emerita) of Geography           | Barbara      | Brower           | Portland State University                               |
| 131 | Lecturer                                   | Maria        | Brown            | Stony Brook University                                  |
| 132 | Instructor of Biology                      | Grover       | Brown            | Pearl River Community College                           |
| 133 | Critical Wildlife Area Biologist III       | Brittney     | Brown            | Florida Fish & Wildlife Conservation Commission         |
| 134 | Citizen Scientist                          | Calli        | Brubeck          | iNaturalist                                             |
| 135 | Mr.                                        | Simon        | Bruslund         | Marlow Bird Park, EAZA                                  |
| 136 | Postgraduate researcher                    | Elizabeth    | Buccheri         | The University of Queensland Australia                  |

Científicos preocupados por la protección de Los Cedros

|     |                                                         |             |                  |                                                       |
|-----|---------------------------------------------------------|-------------|------------------|-------------------------------------------------------|
| 137 | INTEREST: Monitoting for Management of Protected Areas. | Elpidio     | Buelecope Sepa   | Bioko Biodiversity Protection Program (BBPP)          |
| 138 | Director                                                | Kevin       | Buley            | Auckland Zoo, New Zealand                             |
| 139 | Invasive Species Management Coordinator                 | Sian        | Buley            | Auckland Zoo                                          |
| 140 | Professor                                               | Fred        | Bunnell          | Faculty of Forestry, University of British Columbia   |
| 141 | Manager                                                 | Kate        | Burns            | Al Bustan Zoological Centre                           |
| 142 | Graduate researcher                                     | Rian        | Burris           | The Citadel                                           |
| 143 | CEO                                                     | Lucas       | Bustamante       | Tropical Herping                                      |
| 144 | PhD Candidate                                           | Jose        | Bustamante       | Physics Department, McGill University                 |
| 145 | Dr                                                      | Nathalie    | Butt             | The University of Queensland                          |
| 146 | MSc. Biology                                            | Nicole      | Büttner          | Un poco del Chocó                                     |
| 147 | Museum Interpreter                                      | Sheila      | Byers            | Beaty Biodiversity Museum                             |
| 148 | Graduate Research Assistant                             | Andrea      | Byfuglien        | University of British Columbia                        |
| 149 | MSc.                                                    | Al John     | Cabanas          | University of the Philippines Los Banos               |
| 150 | Phd Researcher                                          | Angelica    | Caiza Villegas   | University of Groningen                               |
| 151 | Ph.D.                                                   | Camilo      | Calderon         | Rutgers University                                    |
| 152 | Zoology research intern, science teacher                | Brandon     | Call             | Gallaudet University, Third millennium alliance, FSDB |
| 153 | PhD Candidate                                           | Luis        | Camacho          | University of British Columbia                        |
| 154 | Senior Collection Manager, Genomic Resources            | Mariel      | Campbell         | Museum of Southwestern Biology                        |
| 155 | CEO                                                     | Matt        | Candeias         | In Defense of Plants                                  |
| 156 | Assistant professor                                     | Clare       | Cannon           | University of California, Davis                       |
| 157 | Citizen Scientist                                       | T.A.        | Capak            | iNaturalist                                           |
| 158 | PhD in Ecology and Biodiversity                         | Rafael      | Cárdenas         | Pontificia Universidad Católica del Ecuador           |
| 159 | Adjunct Researcher                                      | Michael     | Cardwell         | San Diego State University                            |
| 160 | Lead educator                                           | Megam       | Carlisle         | Health research institute                             |
| 161 | Assistant Scientist                                     | Monica      | Carlsen          | Missouri Botanical Garden                             |
| 162 | Educator                                                | Eric        | Carrasco         | Gmail                                                 |
| 163 | Training Officer                                        | Luis        | Carrillo         | Amphibian Ark                                         |
| 164 | Director Emeritus                                       | Bryan       | Carroll          | Bristol Zoological Society                            |
| 165 | individual                                              | José        | Carvajal         | No existe                                             |
| 166 | Lecturer in Evolution, Behaviour and Evironment         | Maria Clara | Castellanos      | University of Sussex, United Kingdom                  |
| 167 | Research Director                                       | Luis        | Castillo Roque   | NGO GRUPO RANA                                        |
| 168 | PhD                                                     | Patricia    | Castillo-Briceno | EBIOAC Lab, ULEAM University                          |
| 169 | Assistant Professor                                     | José        | Castro Sotomayor | California State University Channel Islands           |
| 170 | Assistant general manager                               | Simge       | Çelik Atasoy     | Faruk Yalçın zoo                                      |
| 171 | M.Sc.                                                   | Maja        | Celinscak        | USFQ                                                  |

Científicos preocupados por la protección de Los Cedros

|     |                                                  |            |                  |                                                                             |
|-----|--------------------------------------------------|------------|------------------|-----------------------------------------------------------------------------|
| 172 | Postdoctoral Fellow                              | K. Dana    | Chadwick         | Stanford University                                                         |
| 173 | research associate (professor)                   | Robert     | Chambers         | institute of development studies, university of sussex                      |
| 174 | Professor                                        | Kai        | Chan             | University of British Columbia                                              |
| 175 | Director                                         | Nerissa    | Chao             | IUCN SSC Asian Species Action Partnership                                   |
| 176 | Professor Emeritus of Ecology                    | F Stuart   | Chapin           | Institute of Arctic Biology, University of Alaska Fairbanks                 |
| 177 | Licenciada en Ciencias Biológicas                | Natalia    | Charpantier      | Pontificia Universidad Católica del Ecuador                                 |
| 178 | Zoologist                                        | Jessica    | Cheadle          | University of Queensland                                                    |
| 179 | Ecologist                                        | Tegan      | Childers         | University of Tennessee at Chattanooga                                      |
| 180 | PhD Candidate                                    | Carolina   | Chong            | The University of Queensland                                                |
| 181 | PhD student                                      | Shawan     | Chowdhury        | University of Queensland                                                    |
| 182 | Citizen Scientist                                | Thomas     | Chumley          | INaturalist                                                                 |
| 183 | Instructor                                       | Yulia      | Chuvileva        | Emory University                                                            |
| 184 | Professor & Director of Museum of Zoology        | Diego      | Cisneros-Heredia | Universidad San Francisco de Quito USFQ                                     |
| 185 | Senior Veterinarian                              | Scott      | Citino           | White Oak Conservation                                                      |
| 186 | Undergraduate Researcher                         | Jaden      | Clark            | Stanford University                                                         |
| 187 | PhD Candidate                                    | Natalie    | Claunch          | University of Florida                                                       |
| 188 | Veterinary                                       | Sylvie     | Clavel           | African Safari                                                              |
| 189 | Research Professor                               | David A    | Cleveland        | University of California, Santa Barbafa                                     |
| 190 | Professor Emeritus                               | Dr. Stella | Coakley          | Oregon State University                                                     |
| 191 | Program Coordinator                              | Aya        | Cockram          | International Wildlife Rehabilitation Council                               |
| 192 | Vice President of Conservation & Research        | Emily      | Coffey           | Atlanta Botanical Garden                                                    |
| 193 | Distinguished Professor                          | Phyllis    | Coldy            | University of Utah                                                          |
| 194 | Director of Wildlife & Welfare                   | Eric       | Cole             | Toronto Zoo                                                                 |
| 195 | Ms                                               | Teghan     | Collingwood      | The University of Queensland                                                |
| 196 | MSc Environmental Science and HE Animal Lecturer | Clare      | Collins          | University of Hull, Energy and Environment Institute and Bishop Burton Coll |
| 197 | Director                                         | Luis       | Coloma           | Centro Jambatu de Investigación Conservación de Anfibios, Fundación Jambatu |
| 198 | MSc. Ecology ETH                                 | Inez       | Colyn            | WWF Switzerland                                                             |
| 199 | Associate Professor & Director of Science        | Dalia      | Conde            | University of Southern Denmark and Species360                               |
| 200 | Professor                                        | John       | Conery           | University of Oregon                                                        |
| 201 | Associate Professor                              | Ross       | Conover          | Paul Smith's College                                                        |
| 202 | Wildlife Conservation Researcher                 | Deirdre    | Conroy           | Virginia Polytechnic Institute and State University                         |

Científicos preocupados por la protección de Los Cedros

|     |                                                   |                |               |                                                                                   |
|-----|---------------------------------------------------|----------------|---------------|-----------------------------------------------------------------------------------|
| 203 | Manager                                           | Jill           | Conway        | Auckland Zoo                                                                      |
| 204 | Professor of Biology                              | Joseph         | Cook          | University of New Mexico                                                          |
| 205 | Dr                                                | Joseph         | Cooper        | British Trust for Ornithology                                                     |
| 206 | Commissioning Editor,<br>Ecology and Conservation | Ward           | Cooper        | CABI (UK)                                                                         |
| 207 | Mr                                                | Jamieson       | Copsey        | IUCN SSC Conservation Planning<br>Specialist Group                                |
| 208 | Dr John Corder                                    | John           | Corder        | World Pheasant Association                                                        |
| 209 | Program officer                                   | Eugenia        | Cordero       | Center for Species Survival Brazil                                                |
| 210 | Professor PhD                                     | Sergio         | Cordoba       | Universidad de Ciencias Aplicadas<br>y Ambientales UDCA                           |
| 211 | Assistant Vice President                          | Juan           | Cornejo       | Mandai                                                                            |
| 212 | Senior Scientist                                  | Tara           | Cornelisse    | Center for Biological Diversity                                                   |
| 213 | Professor of Biology                              | Diana          | Cosand        | Chaffey College                                                                   |
| 214 | Mr Benjamin J Cosgrove<br>MSc                     | Benjamin       | Cosgrove      | University of Kent                                                                |
| 215 | Senior Scientist & CEO                            | David          | Cox           | David Cox Consulting, LLC                                                         |
| 216 | Research Biologist                                | Rebecca        | Cozad         | Nokuse Plantation                                                                 |
| 217 | Masters Student                                   | Julia          | Craig         | UBC                                                                               |
| 218 | Mr                                                | Peter          | Cranswick     | Wildfowl & Wetlands Trust, UK                                                     |
| 219 | Biologist                                         | Adam           | Craw          | Dudek                                                                             |
| 220 | Dr.                                               | Verónica       | Crespo Pérez  | Escuela de Ciencias Biológicas,<br>Pontificia Universidad Católica<br>del Ecuador |
| 221 | Professor                                         | Daniel         | Croll         | University of Neuchatel                                                           |
| 222 | Mr                                                | Liam           | Crowley       | University of Oxford                                                              |
| 223 | Science Teacher                                   | Florance       | Crowley       | The Lovett School                                                                 |
| 224 | PhD                                               | Sam            | Cruickshank   | Swiss federal research institute<br>WSL                                           |
| 225 | PhD                                               | Sebastian      | Cruz          | Tierramar.org                                                                     |
| 226 | Research assistant                                | Daniela        | Cueva         | Universidad de Cuenca                                                             |
| 227 | PhD in Natural Science                            | Juan           | Cuevas        | WCS                                                                               |
| 228 | MSc. Conservation and<br>Environmental Education  | Jaime          | Culebras      | PWT                                                                               |
| 229 | Africa Conservation Officer                       | Bryan          | Curran        | Rainforest Trust                                                                  |
| 230 | Senior Scientist                                  | Tierra         | Curry         | Center for Biological Diversity                                                   |
| 231 | DVM                                               | Caio Filipe    | Da Motta Lima | Conservation Planning Specialist<br>Group - CPSG/IUCN                             |
| 232 | Federal University of Bahia                       | Eduardo Mendes | Da Silva      | Institute of Biology                                                              |
| 233 | Professor of Tropical Forest<br>Ecology           | James          | Dalling       | University of Illinois at Urbana-<br>Champaign, USA                               |
| 234 | Executive Director,<br>Biologist                  | Anthony        | Daly-Crews    | The Rattlesnake Conservancy                                                       |
| 235 | Professor                                         | Linda          | D'Amico       | Winona State University,<br>Winona, MN                                            |
| 236 | Dr                                                | Helen          | Dancer        | University of Sussex                                                              |
| 237 | Dr                                                | Olivier        | Dangles       | IRD                                                                               |

Científicos preocupados por la protección de Los Cedros

|     |                                                                 |              |                     |                                                                    |
|-----|-----------------------------------------------------------------|--------------|---------------------|--------------------------------------------------------------------|
| 238 | Dr                                                              | Bexell       | Daniel              | Zoo Outreach Organization                                          |
| 239 | Investigador                                                    | Andres       | Dapuez              | CONICET, Argentina                                                 |
| 240 | PhD                                                             | Danielle     | Davenport           | The Univeristy of Queensland                                       |
| 241 | Dr Harriet Davies-Mostert                                       | Harriet      | Davies-Mostert      | Endangered Wildlife Trust                                          |
| 242 | Former Student Researcher                                       | Aleah        | Davis               | University of Oregon                                               |
| 243 | Dr                                                              | Leyla        | De Amicis           | University of Glasgow                                              |
| 244 | Herpetology Researcher                                          | Megan        | De Angelis          | Santa Fe College/University of Florida                             |
| 245 | Curator Cold-blooded animals                                    | Mark         | De Boer             | Rotterdam Zoo                                                      |
| 246 | Researcher                                                      | Ignacio      | De La Riva          | CSIC (High Council of Scientific Research, Spain)                  |
| 247 | PhD                                                             | Stella       | De La Torre         | USFQ                                                               |
| 248 | Research assistant                                              | Amalia Lucía | De La Torre Herrera | Primate behavior and Ecology lab, Instituto de Neuroetologia       |
| 249 | Postdoctoral Fellow                                             | Thomas       | De Pree             | Bucknell University                                                |
| 250 | Ecologist                                                       | Marienne     | De Villiers         | CapeNature, South Africa                                           |
| 251 | Graduate Employee                                               | Kindra       | De'Arman            | University of Oregon                                               |
| 252 | Citizen Scientist                                               | Katherine    | DeCosa              | iNaturalist                                                        |
| 253 | Student Researcher                                              | Ian          | Deery               | University of South Carolina Beaufort                              |
| 254 | PhD Candidate                                                   | Mairin       | Deith               | University of British Columbia                                     |
| 255 | Investigador asociado                                           | Nicolás      | Del Castillo        | Universidad Indoamerica                                            |
| 256 | Research Fellow                                                 | Izabela      | Delabre             | University of Sussex                                               |
| 257 | Mr                                                              | Santiago     | Delgado             | Tragsatec S.A.                                                     |
| 258 | PhD                                                             | Guillaume    | Delhay              | University of Oxford                                               |
| 259 | Master student in Ecology                                       | Sonia        | Demal               | University of Neuchâtel                                            |
| 260 | Professor Emeritus                                              | William      | Derman              | Norwegian University of the Life Sciences                          |
| 261 | PhD Student                                                     | Rhea         | Desai               | McMaster University                                                |
| 262 | Founder & President                                             | Arnaud       | Desbiez             | Instituto de Conservacao de Animais Silvestres -ICAS Brazilian NGO |
| 263 | Professor Dr.                                                   | Dennis       | Desjardin           | San Francisco State University                                     |
| 264 | CEO                                                             | James        | Deutsch             | Rainforest Trust                                                   |
| 265 | Professor of Botany (Emeritus)                                  | Robert       | DeWreede            | The University of British Columbia                                 |
| 266 | KBA co Regional Focal Point for Latin America and the Caribbean | David        | Diaz                | KBA Alliance                                                       |
| 267 | PhD Candidate                                                   | Mara         | Dicenta             | Rensselaer Polytechnic Institute                                   |
| 268 | Professor Emeritus                                              | Alan         | Dickman             | University of Oregon                                               |
| 269 | Citizen Scientist                                               | Jarret       | Dietzler            | Waukesha County Parks                                              |
| 270 | Associate Professor                                             | Jeffrey      | Diez                | University of Oregon                                               |
| 271 | Professor                                                       | Andrew       | Dobson              | Princeton University and Santa Fe Institute                        |
| 272 | Professor                                                       | Pavel        | Dodonov             | Federal University of Bahia                                        |

Científicos preocupados por la protección de Los Cedros

|     |                                                  |             |                    |                                                          |
|-----|--------------------------------------------------|-------------|--------------------|----------------------------------------------------------|
| 273 | Professor                                        | Michael     | Doebeli            | Department of Zoology,<br>University of British Columbia |
| 274 | Researcher                                       | Sabitrie    | Doerga             | Anton de Kom University of<br>Suriname                   |
| 275 | Dr                                               | Thomas      | Doherty-Bone       | TDB Conservation                                         |
| 276 | Senior Coordinator                               | Rainer      | Dolch              | Association Mitsinjo                                     |
| 277 | Executive Director                               | Maria Clara | Dominguez          | Fundacion Zoologica de Cali                              |
| 278 | Senior Scientific Editor                         | Brian       | Donahoe            | Max Planck Institute for Social<br>Anthropology          |
| 279 | senior scientist                                 | Nathan      | Donley             | center for biological diversity                          |
| 280 | Aquatic researcher                               | Martijn     | Dorenbosch         | RAVON                                                    |
| 281 | Herpetologist                                    | Adam        | Dorn               | Inaturalist                                              |
| 282 | Professor                                        | Henrique    | Dos Santos Pereira | Universidade Federal do<br>Amazonas                      |
| 283 | Dr.                                              | Alfonso     | Doucette           | University of Wisconsin Madison                          |
| 284 | Professor of Biology                             | Robert      | Dowler             | Angelo State University                                  |
| 285 | Graduate student                                 | Emily       | Doyle              | University of British Columbia                           |
| 286 | Student                                          | Natsu       | Dragneel           | Gadjah Mada University                                   |
| 287 | Product Owner ZIMS for<br>Husbandry and Aquatics | Nannette    | Driver-Ruiz        | Species360                                               |
| 288 | Wildlife Care Manager                            | Andrea      | Drost              | Toronto Zoo                                              |
| 289 | Clinical Associate Professor                     | Robert      | Druzinsky          | University of Illinois, Chicago                          |
| 290 | Mr                                               | Clément     | Duckert            | University of Neuchâtel                                  |
| 291 | Co-Chair Otter Specialist<br>Group               | Nicole      | Duplaix            | IUCN Survival Service<br>Commission                      |
| 292 | Graduate research                                | Fernanda    | Duque              | Georgia State University                                 |
| 293 | PhD candidate in urban<br>planning               | Ana Maria   | Duran Calisto      | UCLA                                                     |
| 294 | Dr                                               | Juan        | Durango            | Universidad Andina Simon<br>Bolivar                      |
| 295 | Postgraduate researcher                          | Rowan       | Durrant            | Swansea University                                       |
| 296 | Assistant Professor of<br>Wildlife Biology       | Andrew      | Durso              | Florida Gulf Coast University                            |
| 297 | no                                               | Ashli       | Dutan              | no                                                       |
| 298 | Professor                                        | Lee         | Dyer               | University of Nevada Reno                                |
| 299 | Animal Care Specialist                           | Tanner      | Easton             | Zoo                                                      |
| 300 | Postdoctoral researcher                          | Alejandra   | Echeverri          | Stanford University, Natural<br>Capital Project          |
| 301 | Curator of Small Mammals                         | Christie    | Eddie              | Omaha's Henry Doorly Zoo and<br>Aquarium                 |
| 302 | Biodiversity Specialist                          | Nathan      | Edmonds            | CEFAS                                                    |
| 303 | MSc                                              | Rory        | Eggleston          | UTRGV                                                    |
| 304 | Dr Alice Eldridge                                | Alice       | Eldridge           | University of Sussex                                     |
| 305 | Ph.D. student                                    | Mike        | Ellis              | Tulane University                                        |
| 306 | PhD Student                                      | Cassandra   | Elphinstone        | Department of Botany, University<br>of British Columbia  |
| 307 | Executive Director                               | Maya        | Elson              | CoRenewal                                                |

Científicos preocupados por la protección de Los Cedros

|     |                                                       |            |                   |                                                                         |
|-----|-------------------------------------------------------|------------|-------------------|-------------------------------------------------------------------------|
| 308 | Professor of Biology                                  | Richard    | Emlet             | University of Oregon                                                    |
| 309 | Dr                                                    | Richard    | Emslie            | Ecoscot CS                                                              |
| 310 | Director BIOSFERA Research Institute                  | Andrea     | Encalada          | Univesidad San Francisco de Quito                                       |
| 311 | Postdoctoral Associate                                | Lorena     | Endara            | University of Florida - Department of Biology                           |
| 312 | Dr                                                    | María José | Endara            | Universidad tecnológica Indoamérica                                     |
| 313 | dr.                                                   | Debbie     | Eraly             | Ghent University, Belgium                                               |
| 314 | Graduate Student                                      | Francesca  | Erickson          | Auburn University                                                       |
| 315 | Emeritous professor of anthropology                   | Arturo     | Escobar           | University of North Carolina, Chapel Hill                               |
| 316 | PhD in Agroecology                                    | Selene     | Escobar Ramírez   | Universidad San Francisco de Quito                                      |
| 317 | PhD, Assistant Professor                              | Cristina   | Espinosa          | Universtiy of Freiburg                                                  |
| 318 | Profesor-Investigador                                 | Santiago   | Espinosa          | Universidad Autónoma de San Luis Potosí                                 |
| 319 | Professor                                             | Marta      | Estrada           | CSIC, Spain                                                             |
| 320 | Global Communications Manager, One Planet Cities      | Barbara    | Evaeus            | WWF                                                                     |
| 321 | Professor                                             | Laurent    | Excoffier         | Institute of Ecology and Evolution, University of Berne, Switzerland    |
| 322 | Focal Point                                           | Alice      | Eymard            | WWF                                                                     |
| 323 | Director of Animal Care                               | Adam       | Eyres             | Fossil Rim Wildlife Center                                              |
| 324 | PhD candidate                                         | Harold     | Eyster            | University of British Columbia                                          |
| 325 | Master in Ecology                                     | Jose       | Fabara            | UMLS                                                                    |
| 326 | Mr                                                    | Mike       | Fairlie           | Grffith University                                                      |
| 327 | BSN                                                   | Debra      | Fant              | Lincoln County Community Rights                                         |
| 328 | Assistant Professor                                   | Emily      | Farrer            | Tulane University                                                       |
| 329 | Independent researcher                                | John       | Feeney            | Independent                                                             |
| 330 | Citizen Scientist                                     | Wesley     | Ferguson          | iNaturalist                                                             |
| 331 | Doctor                                                | Pilar      | Fernandez-Conradi | University of Neuchatel                                                 |
| 332 | Postdoc                                               | Catarina   | Ferreira          | UFZ                                                                     |
| 333 | Science Operations Manager                            | Gina       | Ferrie            | Disney's Animal Kingdom                                                 |
| 334 | Especialista                                          | Jose Luis  | Fiallo            | Centro Nacional de Áreas Protegidas (Cuba)                              |
| 335 | Research Associate                                    | Jay        | Fidelino          | Biodiversity Research Laboratory, University of the Philippines Diliman |
| 336 | Emeritus Professor                                    | Elmer      | Finck             | Fort Hays State University                                              |
| 337 | Professor of Plant Ecology                            | Markus     | Fischer           | University of Bern                                                      |
| 338 | Managing Director                                     | Christian  | Fischer           | Oxenu LLP                                                               |
| 339 | Senior Lecturer, Anthropology and Development Studies | Erin       | Fitz-Henry        | University of Melbourne                                                 |



Científicos preocupados por la protección de Los Cedros

|     |                                                                |              |                   |                                                                             |
|-----|----------------------------------------------------------------|--------------|-------------------|-----------------------------------------------------------------------------|
| 340 | Director of Science Emeritus                                   | Nathan       | Flesness          | Species 360                                                                 |
| 341 | Licenciado en Ciencias Biológicas Puras                        | George       | Fletcher          | PUCE                                                                        |
| 342 | Distinguished Professor Emerita                                | Cornelia     | Flora             | Iowa State University                                                       |
| 343 | Universidad San Francisco de Quito                             | Mateo        | Flores            | iBIOTrop(Laboratorio de Zoología Terrestre)                                 |
| 344 | Researcher                                                     | Constanza    | Flores            | CONICET                                                                     |
| 345 | Associate Professor                                            | Claudio      | Fogu              | UCSB                                                                        |
| 346 | Graduate Student                                               | Lydia        | Fong              | University of British Columbia                                              |
| 347 | Distinguished Professor of Environmental Studies and Sociology | John         | Foran             | UCSB                                                                        |
| 348 | PhD, Sociology                                                 | Allison      | Ford              | University of Oregon                                                        |
| 349 | Associate Professor                                            | Jessica      | Forrest           | University of Ottawa                                                        |
| 350 | Dr.                                                            | Lucas        | Forti             | UFBA                                                                        |
| 351 | Field Biologist                                                | Matthew      | Fossum            | Independent Contractor                                                      |
| 352 | professor                                                      | Tamara       | Frank             | Nova Southeastern University                                                |
| 353 | Manager of Welfare Science                                     | Maria        | Franke            | Toronto Zoo                                                                 |
| 354 | Emeritus Professor in Biology                                  | Richard      | Frankham          | Macquarie University, NSW, Australia                                        |
| 355 | Director Museum of Natural History                             | Bud          | Freeman           | University of Georgia                                                       |
| 356 | Chairman                                                       | Juan         | Freile            | Committee for Ecuadorian Records in Ornithology                             |
| 357 | Reader in Physical Geography                                   | Michael      | Frogley           | University of Sussex, UK                                                    |
| 358 | Assistant Professor                                            | Mariana      | Fuentes           | Florida State University                                                    |
| 359 | Senior Lecturer in Sociology                                   | Daniel       | Gabaldón Estevan  | University of Valencia                                                      |
| 360 | PhD                                                            | Giussepe     | Gagliardi-Urrutia | Pontificia Universidade Catolica do Rio Grande do Sul                       |
| 361 | Master of Science in Veterinary Medicine                       | David Javier | Galindo Huamán    | São Paulo State University, School of Agricultural and Veterinarian Science |
| 362 | Commonwealth Professor of Biology                              | Laura        | Galloway          | University of Virginia                                                      |
| 363 | Director of Latin American Programs                            | Carlos R.    | Garcia            | International Conservation Fund of Canada                                   |
| 364 | Profesor Titular de Universidad                                | Pablo        | Garcia Murillo    | Universidad de Sevilla. SPAIN                                               |
| 365 | PhD Candidate                                                  | Jenny        | García Ruales     | Philipps University of Marburg/Heinrich Böll Foundation                     |
| 366 | Postdoctoral Research Associate                                | Emma         | Gardner           | University of Reading, UK                                                   |

Científicos preocupados por la protección de Los Cedros

|     |                                                   |                |                    |                                                                         |
|-----|---------------------------------------------------|----------------|--------------------|-------------------------------------------------------------------------|
| 367 | Assistant Professor                               | Rachael        | Garrett            | ETH Zurich                                                              |
| 368 | Citizen Scientist                                 | Zenobia        | Garrison           | iNaturalist                                                             |
| 369 | Professor of Zoology, emeritus                    | Lee            | Gass               | University of British Columbia                                          |
| 370 | PhD Student                                       | Jethro         | Gauld              | University of East Anglia                                               |
| 371 | Prof.                                             | María Mercedes | Gavilanez          | Universidad Central del Ecuador                                         |
| 372 | student/assistant researcher                      | Jeremy         | Geiger             | Santa Fe Turtle Project - Santa Fe College                              |
| 373 | Research Associate                                | Armando        | Gerades            | University of British Columbia                                          |
| 374 | Dr.                                               | Günter         | Gerlach            | Botanical Garden Munich / Germany                                       |
| 375 | Citizen Scientist                                 | Parker         | Gibbons            | INaturalist                                                             |
| 376 | Programme Officer                                 | Claudine       | Gibson             | IUCN Conservation Planning Specialist Group                             |
| 377 | Head of Life Science                              | Richard        | Gibson             | Auckland Zoo                                                            |
| 378 | Dr                                                | Michelle       | Gibson             | The University of Queensland                                            |
| 379 | Adjunct Professor and Lecturer                    | Dr. Princess   | Gilbert            | Crafton Hills College and UCLA                                          |
| 380 | Professor                                         | Josep-Maria    | Gili               | Institut de Ciències del Mar de Barcelona (CSIC)                        |
| 381 | Research Affiliate                                | Satinder       | Gill               | University of Cambridge                                                 |
| 382 | Wildlife biologist                                | Chris          | Gillette           | University of Florida                                                   |
| 383 | Consultant                                        | Jean           | Gilruth            | Independent                                                             |
| 384 | Executive Director & Chief Conservation Scientist | Anthony        | Giordano           | S.P.E.C.I.E.S.                                                          |
| 385 | Assistant Professor                               | Sydney         | Glassman           | University of California, Riverside                                     |
| 386 | Zoologist                                         | Poppy          | Glendening         | University of Sussex                                                    |
| 387 | Associate Professor of Anthropology               | Jeffrey        | Glover             | Georgia State University                                                |
| 388 | trainee curator                                   | Miriam         | Göbel              | Frankfurt Zoo                                                           |
| 389 | Student                                           | Kartik         | Gokhale            | Uttarakhand University of Horticulture and Forestry, Uttarakhand, India |
| 390 | Biologist                                         | Marylin        | Gonzalez           | University of North Carolina Wilmington                                 |
| 391 | PhD candidate                                     | Mariana        | González           | UNAN                                                                    |
| 392 | Professor of Anthropology                         | Olatz          | Gonzalez Abrisketa | University of the Basque Country (UPV/EHU)                              |
| 393 | PhD, DBE,                                         | Jane           | Goodall            | Founder of the Jane Goodall Institute & UN Messenger of Peace           |
| 394 | Executive Director                                | Jeremy         | Goodman            | Roger Williams Park Zoo                                                 |
| 395 | M.Sc., Ph.D. Student                              | Katie          | Goodwin            | University of British Columbia                                          |
| 396 | Retired Professor of Botany & Genetics            | Hit            | Goswami            | Retired from Barkatullah University, Bhopal, India                      |
| 397 | Professor of Biology                              | David          | Goulson            | University of Sussex                                                    |
| 398 | Veterinarian                                      | Pamela         | Govett             | Milwaukee County Zoo                                                    |

Científicos preocupados por la protección de Los Cedros

|     |                                    |                 |                 |                                                              |
|-----|------------------------------------|-----------------|-----------------|--------------------------------------------------------------|
| 399 | Postdoctoral Researcher            | Zbigniew        | Grabowski       | Cary Institute of Ecosystem Studies / the New School         |
| 400 | Professor and Head                 | Sean            | Graham          | Department of Botany, University of British Columbia, Canada |
| 401 | None                               | Michael         | Graham          | None                                                         |
| 402 | Specialist Group Member            | John            | Gramieri        | IUCN Anteater, Sloth and Armadillo Specialist Group          |
| 403 | Field Assistant                    | Jessica         | Grant           | SUNY-ESF                                                     |
| 404 | Professor Emeritus                 | Peter           | Grant           | Princeton University                                         |
| 405 | Research Scholar Emerita           | Rosemary        | Grant           | Princeton University                                         |
| 406 | MSc Biology; PhD Candidate-Biology | Dana            | Green           | University of Regina                                         |
| 407 | Professor Emerita                  | Beverley        | Green           | University of British Columbia, Vancouver, B.C., Canada      |
| 408 | Senior Lecturer                    | Itay            | Greenspan       | Hebrew University of Jerusalem                               |
| 409 | Endangered Species Director        | Noah            | Greenwald       | Center for Biological Diversity                              |
| 410 | Executive Director                 | Myfanwy         | Griffith        | European Association of Zoos and Aquaria (EAZA)              |
| 411 | Curator and Professor              | David           | Grimaldi        | American Museum of Natural History                           |
| 412 | Graduate Student                   | Evan            | Grimes          | University of Southern                                       |
| 413 | Dr.                                | Andreas         | Groeger         | Munich Botanic Garden, Germany                               |
| 414 | Biologist                          | Lexie           | Gropper         | Amisacho Restauración                                        |
| 415 | Dr.                                | Pierre          | Grothmann       | Zoo in der Wingst, Vet Practice                              |
| 416 | OxPOCH Project Coordinator         | Henry           | Grub            | University of Oxford                                         |
| 417 | Conservation Programs Manager      | Laura           | Gruber          | White Oak Conservation                                       |
| 418 | Postdoctoral Research Fellow       | Jared           | Grummer         | University of British Columbia                               |
| 419 | Coordinador                        | María           | Guarderas       | Centro Jambatu                                               |
| 420 | Professor                          | Juan            | Guayasamin      | Universidad San Francisco de Quito                           |
| 421 | Natural Resource Ecologist         | Laura           | Guderyahn       | Portland Parks and Recreation                                |
| 422 | Associate professor                | Anne G          | Gudmundsdotter  | University of South-Eastern Norway                           |
| 423 | PhD (candidate)                    | Esteban         | Guevara         | Swiss Federal Research Institut WSL                          |
| 424 | Ninguno-escriptor.                 | Juan Manuel     | Guevara         | Independiente.                                               |
| 425 | Professor                          | Antoine         | Guisan          | University of Lausanne                                       |
| 426 | Research professional              | Miranda         | Gulsby          | University of Georgia                                        |
| 427 | Development Manager                | Sheila          | Gundry          | Froglife                                                     |
| 428 | Board Member                       | Brij            | Gupta           | International Zoo Educators Association                      |
| 429 | Associate Professor                | María Antonieta | Guzmán-Gallegos | VID specialized university                                   |

Científicos preocupados por la protección de Los Cedros

|     |                                                           |                |                |                                                                      |
|-----|-----------------------------------------------------------|----------------|----------------|----------------------------------------------------------------------|
| 430 | Field technician                                          | Kiley          | Haberman       | DNR                                                                  |
| 431 | MA Sustainability and Climate Policy                      | Cathy          | Hall           | Curtin University Western Australia Australia                        |
| 432 | Assistant Professor                                       | Lauren         | Hallett        | University of Oregon                                                 |
| 433 | Chair                                                     | James          | Hallett        | Society for Ecological Restoration                                   |
| 434 | Founder, Biologist                                        | Paul           | Hamilton       | The Biodiversity Group                                               |
| 435 | Chief Scientist                                           | Healy          | Hamilton       | NatureServe                                                          |
| 436 | Grant Manager                                             | Tinisha        | Hancock        | Global Wildlife Conservation                                         |
| 437 | Senior Lecturer in Ethics, Politics and Environment       | Mike           | Hannis         | Bath Spa University, UK                                              |
| 438 | Head of Research, DVM                                     | Therese        | Hård           | Boras Zoo, Sweden                                                    |
| 439 | Assistant Professor of Water and Society                  | Dean           | Hardy          | University of South Carolina                                         |
| 440 | Conservation photographer                                 | Joyce          | Harman         | iNaturalist                                                          |
| 441 | Auckland Zoo                                              | Carrie         | Harpur         | Auckland Zoo                                                         |
| 442 | Professor (Distinguished) and member, US National Academy | Susan          | Harrison       | U. C. Davis                                                          |
| 443 | Professor of the Graduate School                          | John           | Harte          | University of California, Berkeley                                   |
| 444 | Dr.                                                       | Mary           | Harte          | self                                                                 |
| 445 | Dr.                                                       | Stefanie       | Hartmann       | FrInaT                                                               |
| 446 | Conservation Officer                                      | Yvette         | Harvey-Brown   | Botanic Gardens Conservation International                           |
| 447 | Naturalist                                                | Amanda         | Hastings       | Asheville Hiking Tours                                               |
| 448 | BSc Mres                                                  | Adrianna       | Hawczak        | Queen Mary University of London, Centre of Ecology and Hydrology, UK |
| 449 | Director of Animal Care                                   | Nancy          | Hawkes         | Woodland Park Zoo                                                    |
| 450 | Coordinator, Natural Resources Management Unit            | Nandita        | Hazarika       | EcoSystems-India                                                     |
| 451 | Associate Researcher                                      | Richard        | Hazell         | University of Sussex                                                 |
| 452 | x                                                         | Clare          | Healy          | Auckland Zoo                                                         |
| 453 | Aquatic environmen researcher.                            | Terneus Jácome | Héctor Esteban | Universidad Internacional del Ecuador                                |
| 454 | Retired wildlife ecologist                                | Lorraine       | Heisler        | US Fish and Wildlife Service                                         |
| 455 | CEO                                                       | Sanna          | Hellstrom      | Helsinki Zoo                                                         |
| 456 | Citizen Scientist                                         | Ronald         | Hendershot     | inatural                                                             |
| 457 | Associate Professor                                       | Logan          | Hennessy       | San Francisco State University                                       |
| 458 | Ms                                                        | Shasta         | Henry          | University of Tasmania                                               |
| 459 | Professor of Biogeography                                 | Greg           | Henry          | University of British Columbia                                       |
| 460 | Director                                                  | Alma           | Hernández      | Asociación NPC Colombia                                              |
| 461 | Biologo marino                                            | Fiochi         | Herrera        | We can be heroes                                                     |
| 462 | Conservation Coordinator                                  | Katharina      | Herrmann       | Zoologische Gärten Berlin                                            |
| 463 | Dr                                                        | Heather        | Hesterman      | Tasmania Zoo                                                         |
| 464 | Alice Hilgart, MS                                         | Alice          | Hilgart        | Stephen F Austin State University                                    |

Científicos preocupados por la protección de Los Cedros

|     |                                           |                  |                      |                                                                             |
|-----|-------------------------------------------|------------------|----------------------|-----------------------------------------------------------------------------|
| 465 | M.A. Political Science                    | Thomas           | Hilker               | LOVE FOR LIFE e.V.                                                          |
| 466 | Kalmia Gardens                            | Dan              | Hill                 | Coker University                                                            |
| 467 | PhD                                       | Aj               | Hilton               | University of Arizona                                                       |
| 468 | Steven L. Hilty, Ph.D.,                   | Steve            | Hilty                | University of Kansas Biodiversity Institute and Victor Emanuel Nature Tours |
| 469 | citizen scientist                         | Annelise         | Hipps                | i naturalist                                                                |
| 470 | Dr.                                       | Daniele          | Hoffmann             | EPI                                                                         |
| 471 | Graduate Research Assistant               | Michael          | Holden               | Virginia Tech                                                               |
| 472 | Dr                                        | Tessa            | Holland              | Newcastle University                                                        |
| 473 | Mr                                        | C T              | Holloway             | University of Sussex                                                        |
| 474 | Biology Instructor, Botanist & Mycologist | Susan            | Holmes               | Lane Community College                                                      |
| 475 | Professor                                 | Marcel           | Holyoak              | University of California, Davis, California                                 |
| 476 | Senior Program Officer                    | Kathy            | Holzer               | Global Conservation Network                                                 |
| 477 | University Professor Emeritus             | Rodney           | Honeycutt            | Pepperdine University                                                       |
| 478 | Dr. Iris V. Hood                          | Dr. Iris Vanessa | Hood                 | The Chapin School                                                           |
| 479 | Utah State University                     | Elham            | Hoominfar            | Utah State University                                                       |
| 480 | Assistant Professor                       | Dr. Lily         | House-Peters         | California State University, Long Beach                                     |
| 481 | Research Associate                        | Ryan             | Huang                | Duke University                                                             |
| 482 | Mycology Graduate Student                 | Hannah           | Huber                | SUNY ESF                                                                    |
| 483 | Part-time Lecturer                        | Daniel           | Hudon                | Northeastern University                                                     |
| 484 | Mr                                        | Alex             | Hudson               | Botanic Gardens Conservation International                                  |
| 485 | Professor                                 | Marc             | Hufty                | Graduate Institute of International and Development Studies                 |
| 486 | Ph.D Candidate                            | Kelsey           | Huisman              | University of Wisconsin - Madison                                           |
| 487 | Research Associate Professor              | Denise           | Humphreys Bebbington | Clark University                                                            |
| 488 | Dr Humphry PhD MSc MA BA                  | Debbie           | Humphry              | Kingston University UK                                                      |
| 489 | Professor                                 | Yasmin           | Hurd                 | Icahn School of Medicine at Mount Sinai                                     |
| 490 | Mr                                        | Kevin            | Hutcheson            | University of Georgia                                                       |
| 491 | Professor of Sustainable Resource Use     | Jonathan         | Hutton               | Luc Hoffmann Institute                                                      |
| 492 | Citizen scientist                         | Skye             | Ibarra               | INaturalist                                                                 |
| 493 | Conservation Scientist                    | Amy              | Iler                 | Chicago Botanic Garden                                                      |

Científicos preocupados por la protección de Los Cedros

|     |                                                   |              |                     |                                                                  |
|-----|---------------------------------------------------|--------------|---------------------|------------------------------------------------------------------|
| 494 | Professor Emeritus, University of Maryland        | David        | Inouye              | Rocky Mountain Biological Laboratory, and University of Maryland |
| 495 | Professor of Biological Science                   | Brian        | Inouye              | Florida State University                                         |
| 496 | Executive Director                                | Craig        | Ivanyi              | Arizona-Sonora Desert Museum                                     |
| 497 | Scientist                                         | Arati        | Iyengar             | University at Albany                                             |
| 498 | Honorary Fellow, Bangor University                | Nick         | Jackson             | Welsh Mountain Zoo - National Zoo of Wales                       |
| 499 | Wildlife biologist                                | Rosemary     | Jackson             | Symbiotic Solutions LLC                                          |
| 500 | Instructor of Biology                             | Collin       | Jaeger              | McHenry County College                                           |
| 501 | Preventing Extinctions Coordinator                | Anuj         | Jain                | BirdLife International                                           |
| 502 | citizen scientist                                 | Prakrit      | Jain                | iNaturalist                                                      |
| 503 | Wildlife Disease Risk Analyst                     | Richard      | Jakob-Hoff          | IUCN Conservation Planning Specialist Group                      |
| 504 | PhD Candidate                                     | Dana         | James               | University of British Columbia                                   |
| 505 | Research Associate                                | Alexandra    | Jansen Van Rensburg | University of Bristol                                            |
| 506 | Chief Scientist and Laboratory Fellow             | Janet        | Jansson             | Pacific Northwest National Laboratory                            |
| 507 | Senior Scientist, Laboratory Fellow               | Christer     | Jansson             | Pacific Northwest National Laboratory                            |
| 508 | Professor of Conservation Biology                 | Daniel       | Janzen              | University of Pennsylvania; advisor to Government of Costa Rica  |
| 509 | Citizen scientist                                 | McAulay      | Jaunsen             | iNaturalist                                                      |
| 510 | PhD Student                                       | Alexandra    | Jebb                | University of Aberdeen                                           |
| 511 | Associate Professor                               | Clinton      | Jenkins             | Florida International University                                 |
| 512 | Postdoctoral Research Fellow                      | Thomas       | Jenkinson           | University of California, Berkeley                               |
| 513 | Arboreal Research Technician                      | Araya        | Jensen              | Independent contractor-many                                      |
| 514 | Conservator                                       | Kirensky Mbi | Jerry               | Takamanda National Park in Cameroon                              |
| 515 | Director                                          | Carolina     | Jijon               | Jardin Botanico Quito                                            |
| 516 | Adjunct Professor in Zoology, Emeritus Scientist  | Ora          | Johannsson          | University of British Columbia, Fisheries and Oceans Canada      |
| 517 | Professor                                         | David        | John                | Natural History Museum London                                    |
| 518 | Taxon Officer                                     | Kevin        | Johnson             | Amphibian Ark                                                    |
| 519 | Dr                                                | Bridget      | Johnson             | University of Western Australia                                  |
| 520 | Professor                                         | Glenn        | Johnson             | State University of New York at Potsdam                          |
| 521 | Citizen Scientist                                 | Eric         | Johnson             | iNaturalist                                                      |
| 522 | Senior Fellow - Environment, Health, Human Rights | Barbara Rose | Johnston            | Center for Political Ecology (Santa Cruz, California)            |
| 523 | Research Methods & Biotechnology Instructor       | Jeremy       | Jonas               | Tucson High Magnet School                                        |

Científicos preocupados por la protección de Los Cedros

|     |                                                    |             |               |                                                              |
|-----|----------------------------------------------------|-------------|---------------|--------------------------------------------------------------|
| 524 | Assistant Professor                                | Eric        | Jones         | UT Health Science Center at Houston                          |
| 525 | Director of Botanic Gardens                        | Kristina    | Jones         | Wellesley College                                            |
| 526 | Researcher                                         | Kirk        | Jones         | KDSJ Environmental                                           |
| 527 | Citizen Scientist                                  | Andrew      | Jones         | Inaturalist                                                  |
| 528 | Dr.                                                | Eelke       | Jongejans     | Radboud University                                           |
| 529 | Ecologist                                          | Martine     | Jordaan       | Western Cape Nature Conservation Board (CapeNature)          |
| 530 | Manager Tropical Andes and Central America         | Christopher | Jordan        | Global Wildlife Conservation                                 |
| 531 | Fellow (PBF) and Director (Fundacion EcoMinga)     | Lou         | Jost          | Population Biology Foundation (PBF) and Fundacion EcoMingaa, |
| 532 | Mr.                                                | Diego       | Juffe-Bignoli | University of Kent                                           |
| 533 | Dr                                                 | Emad        | Kaky          | Sulaimani Polytechnic University                             |
| 534 | Professor of sociology                             | Rami        | Kaplan        | Tel Aviv University                                          |
| 535 | Laurens N. Ruben Professor of Biology              | Keith       | Karoly        | Reed College                                                 |
| 536 | Associate Professor                                | Jordan      | Karubian      | Tulane University                                            |
| 537 | President                                          | Penelope    | Kasper        | Fermilab Natural Areas                                       |
| 538 | Mrs.                                               | Christel    | Kasselmann    | private                                                      |
| 539 | Dr.                                                | Shai        | Kassirer      | University of Brighton                                       |
| 540 | Associate Professor                                | Craig       | Kauffman      | University of Oregon                                         |
| 541 | Executive Director                                 | Thomas      | Kaye          | Institute for Applied Ecology                                |
| 542 | Senior Teaching Fellow                             | Michael     | Keary         | Nazarbayev University                                        |
| 543 | PhD Candidate                                      | Kevin       | Keegan        | University of Connecticut                                    |
| 544 | Committee                                          | Catherine   | Keil          | FLBP                                                         |
| 545 | Graduate researcher                                | Sarah       | Kelehear      | University of Tennessee Chattanooga                          |
| 546 | Executive Director, WildCare Institute             | Lisa        | Kelley        | Saint Louis Zoo                                              |
| 547 | Professor of Zoology                               | Patrick     | Kelly         | California State University, Stanislaus                      |
| 548 | Ecologist                                          | Emma        | Kennedy       | University of Queensland                                     |
| 549 | Professor Emerita                                  | Susan       | Kephart       | Willamette University                                        |
| 550 | Manager of Species Recovery and Program Assessment | Kevin       | Kerr          | Toronto Zoo                                                  |
| 551 | Msc                                                | Jos         | Kielgast      | University of Copenhagen                                     |
| 552 | Dr                                                 | Keith       | Kirby         | Department of Plant Sciences, Oxford University              |
| 553 | Academic Specialist                                | Sheril      | Kirshenbaum   | Michigan State University                                    |
| 554 | Research Associate                                 | Guy         | Kirwan        | Field Museum of Natural History, Chicago                     |
| 555 | Master student                                     | Natasha     | Klasios       | University of British Columbia                               |
| 556 | Professor of Mathematics                           | David       | Klein         | California State University Northridge                       |

Científicos preocupados por la protección de Los Cedros

|     |                                                    |                 |             |                                                          |
|-----|----------------------------------------------------|-----------------|-------------|----------------------------------------------------------|
| 557 | Watershed Coalition Coordinator                    | Peter           | Kleinhenz   | Tall Timbers Research Station and Land Conservancy       |
| 558 | Diplom Biologist                                   | Heiner          | Klös        | Zoological Garden Berlin                                 |
| 559 | Associate Professor of Environmental Science       | Karen           | Knee        | American University                                      |
| 560 | Dr                                                 | Sabina          | Knees       | Royal Botanic Garden Edinburgh                           |
| 561 | Volunteer Programme Coordinator BSc                | Helen           | Knight      | Auckland Zoo, New Zealand                                |
| 562 | Professor of Climate Science and Society           | Dominic         | Kniveton    | University of Sussex                                     |
| 563 | Assistant Professor of Anthropology                | Catherine       | Knott       | University of Alaska                                     |
| 564 | Associate Professor of Biology                     | Travis          | Knowles     | Francis Marion University                                |
| 565 | Citizen Scientist                                  | Tristan         | Koga        | iNaturalist                                              |
| 566 | Executive Director/Researcher                      | Sebastian       | Kohn        | Fundacion Condor Andino Ecuador                          |
| 567 | Graduate Student Assistant in Conservation Ecology | Laura           | Kojima      | University of Georgia                                    |
| 568 | Prof. Dr.                                          | Johannes        | Kollmann    | Technical University of Munich                           |
| 569 | Dr.                                                | Lydia           | Kolter      | curator at Cologne zoo, retired since 2017               |
| 570 | Senior Associate                                   | Rebecca         | Kormos      | Global Wildlife Conservation                             |
| 571 | Prof.                                              | Christian       | Körner      | University of Basel                                      |
| 572 | Wildlife Biologist                                 | Alex            | Krevitz     | Independent                                              |
| 573 | professor                                          | Torsten Nygaard | Kristensen  | Aalborg University                                       |
| 574 | Biologist                                          | Joshua          | Kuczora     | JPK Biological                                           |
| 575 | Professor                                          | Glen            | Kuecker     | DePauw University                                        |
| 576 | Post-doctoral Researcher                           | Caitie          | Kuempel     | University of Queensland                                 |
| 577 | Evaluation and Monitoring Officer                  | Devender        | Kumar       | Alnkeet Ltd., New Delhi India                            |
| 578 | Environmental Scientist                            | Dejan           | Kuzman      | University Novi Sad, Serbia                              |
| 579 | Executive Director                                 | Jessica         | Labaja      | Large Marine Vertebrates Research Institute Philippines  |
| 580 | Senior Conservation Scientist                      | Robert          | Lacy        | Species Conservation Toolkit Initiative                  |
| 581 | Dr., ph.D.                                         | Thomas          | Læssøe      | University of Copenhagen                                 |
| 582 | Assistant Professor                                | Laura           | Lagomarsino | Louisiana State University                               |
| 583 | Head of Facility Services                          | Monica          | Lake        | Auckland Zoo                                             |
| 584 | student                                            | Arushi          | Lakhan-Pal  | University of California, Santa Barbara                  |
| 585 | Co-founder and Managing Director                   | Anne            | Lambert     | International Conservation Fund of Canada                |
| 586 | Dr                                                 | Fran            | Lambrick    | Not1More                                                 |
| 587 | Emeritus Professor                                 | Russell         | Lande       | Division of Biology, University of California, San Diego |



Científicos preocupados por la protección de Los Cedros

|     |                                                                   |           |              |                                                          |
|-----|-------------------------------------------------------------------|-----------|--------------|----------------------------------------------------------|
| 588 | Bird Researcher Master's Student                                  | Edward    | Landi        | Colorado State University Pueblo                         |
| 589 | Citizen Scientist                                                 | Mikael    | Landre       | INaturalist.Org                                          |
| 590 | CFO                                                               | Chris     | Landsberg    | Cologne Zoo Germany                                      |
| 591 | Phd                                                               | Andreas   | Lang         | University of Basel, Environmental Sciences, Switzerland |
| 592 | Mr                                                                | Richard   | Lansdown     | IUUCN SSC Freshwater Plant Specialist Group              |
| 593 | Assistant Professor                                               | Loralee   | Larios       | University of California Riverside                       |
| 594 | Entomologist, Professor of Biology                                | Kirk      | Larsen       | Luther College                                           |
| 595 | Distinguished Professor                                           | William   | Laurance     | James Cook University                                    |
| 596 | Nature Photographer - Earth Advocate                              | Jaime     | Laureano     | Aqua Graphics                                            |
| 597 | Owner and biologist                                               | Richard   | LaVal        | The Monteverde Bat Jungle, Costa Rica                    |
| 598 | Lic. En gestión ambiental                                         | Cristian  | Lavarda      | Universidad Blas Pascsl, Córdoba, Argentina              |
| 599 | Professor                                                         | Philippe  | Le Billon    | University of British Columbia                           |
| 600 | PhD, PDF                                                          | Ludovic   | Le Renard    | The University of British                                |
| 601 | Ecologist                                                         | Tao       | Lee          | Jacobs                                                   |
| 602 | Professor and Clark Stevens Chair of Biology                      | Tom       | Lee          | Abilene Christian University                             |
| 603 | Communications Manager                                            | Richard   | Lee          | WWF                                                      |
| 604 | Ms                                                                | Caroline  | Lees         | Auckland University                                      |
| 605 | ecologist                                                         | Hilary    | Lefort       | Trent University                                         |
| 606 | associate professor                                               | Esben     | Leifsen      | Norwegian Universtiy of Life Sciences                    |
| 607 | Research Scholar                                                  | Renata    | Leite Pitman | Duke University                                          |
| 608 | Dr                                                                | Breffní   | Lennon       | University College Cork                                  |
| 609 | Dr.                                                               | Guillaume | Lentendu     | University of Neuchâtel                                  |
| 610 | Professor emeritus                                                | Donald    | Les          | University of Connecticut                                |
| 611 | Professor/researcher                                              | Gisele    | Lessa        | Universidade Federal de Viçosa. Brasil                   |
| 612 | PhD                                                               | Alathea   | Letaw        | University of British Columbia                           |
| 613 | Professor Dr.                                                     | Adrian    | Leuchtman    | Dept. of Environmental Systems Science, ETH Zürich       |
| 614 | President                                                         | Joshua    | Lev          | Callix Research, Inc.                                    |
| 615 | Emeritus Professor                                                | Alan      | Lewis        | University of British Columbia                           |
| 616 | Professor of Earth and Environmental Sciences                     | Tammy     | Lewis        | City University of New York                              |
| 617 | Professor of Interaction Design, Sustainability and Social Change | Ann       | Light        | Malmö University                                         |
| 618 | Micropropagation & Seed Bank Coordinator                          | Jason     | Ligon        | Atlanta Botanical Garden                                 |

Científicos preocupados por la protección de Los Cedros

|     |                                                                    |            |                |                                                                       |
|-----|--------------------------------------------------------------------|------------|----------------|-----------------------------------------------------------------------|
| 619 | Researcher                                                         | Felix      | Lim            | WCS Indonesia, NUS Singapore                                          |
| 620 | Mr                                                                 | Nick       | Lindsay        | Conservation Planning Specialist Group                                |
| 621 | Dr                                                                 | Jeremy     | Lindsell       | A Rocha International                                                 |
| 622 | Codirector                                                         | Ronnie     | Lipschutz      | Sustainable Systems Research Foundation                               |
| 623 | Postdoctoral Research Fellow                                       | Chelsea J. | Little         | University of British Columbia, Department of Zoology                 |
| 624 | Assistant Professor                                                | Andrew     | Littlejohn     | Leiden University                                                     |
| 625 | Mater of Environmental Management                                  | Juan Diego | Llano          | Duke University                                                       |
| 626 | citizen scientist                                                  | Tina       | Lopez          | iNaturalist                                                           |
| 627 | PhD(c)                                                             | Rocio      | Lopez          | IRES - UBC                                                            |
| 628 | Doctora en Biología                                                | Yomaira    | López          | Unidad Educativa 'Gran Colombia'. Ministerio de Educación del Ecuador |
| 629 | Research Student Master of Conservation Science                    | Maria Jose | Lopez Jara     | The University of Queensland                                          |
| 630 | PhD candidate                                                      | Sofia      | Lopez-Cubillos | The university of Queensland                                          |
| 631 | Professor                                                          | Cristina   | Lopez-Gallego  | University of Antioquia, Colombia                                     |
| 632 | Arrell Chair in Food, Policy, and Society, and Associate Professor | Philip     | Loring         | University of Guelph                                                  |
| 633 | Professional Scientists                                            | Stefan     | Lötters        | Trier University, Trier, Germany                                      |
| 634 | Environmental consultant                                           | Diana      | Loubser        | Ecosystem Services Ltd. New Zealand                                   |
| 635 | Director General                                                   | Edward     | Louis          | Madagascar Biodiversity Partnership, NGO                              |
| 636 | Professor of Anthropology and Environmental Studies (ret.)         | Thomas     | Love           | Linfield University                                                   |
| 637 | Citizen scientist                                                  | Iva        | Lubina         | iNaturalist                                                           |
| 638 | Senior Lecturer, Science and Technology Studies                    | Dr Adam    | Lucas          | University of Wollongong                                              |
| 639 | Student                                                            | Addison    | Luck           | Yale                                                                  |
| 640 | Curator                                                            | Robert     | Lücking        | Botanischer Garten und Botanisches Museum Berlin                      |
| 641 | Manager of IUCN Red List Assessments                               | Jennifer   | Luedtke        | Global Wildlife Conservation                                          |
| 642 | Dr.                                                                | Martin C.  | Lukas          | University of Bremen, Germany                                         |
| 643 | Director                                                           | Päivi      | Lundvall       | FANC, Finnish association for nature conservation                     |
| 644 | Director of Animal Management & Health                             | Gary       | Lunsford       | Milwaukee County Zoo                                                  |
| 645 | Director Conservation, Research and Veterinary                     | Dr Sonja   | Luz            | Wildlife Reserves Singapore                                           |
| 646 | PhD student                                                        | Vanessa    | Luzuriaga      | University of Toronto                                                 |

Científicos preocupados por la protección de Los Cedros

|     |                                                 |            |                  |                                               |
|-----|-------------------------------------------------|------------|------------------|-----------------------------------------------|
| 647 | Co-Director, Environmental Leadership Program   | Katie      | Lynch            | University of Oregon                          |
| 648 | Executive director                              | Ryan       | Lynch            | Third Millennium Alliance                     |
| 649 | Naturalist and Chief Operating Officer          | Barry      | Lyon             | Victor Emanuel Nature Tours                   |
| 650 | Professor                                       | Georgina   | Mace             | University College London                     |
| 651 | Population Geneticist                           | Paul       | Maier            | Gene by Gene                                  |
| 652 | Research Associate                              | Louise     | Mair             | Newcastle University                          |
| 653 | Bachelor                                        | Gabriela   | Maldonado        | UTI                                           |
| 654 | Associate Professor of Sociology                | Stephanie  | Malin            | Colorado State University                     |
| 655 | Lab Technician                                  | Rebeca     | Mallenco Fornies | ICM-CSIC (Spain)                              |
| 656 | Conservation Specialist                         | Mary       | Mallinger        | Minnesota Zoo                                 |
| 657 | Dr.                                             | Antonio    | Malo Larrea      | Universidad Católica de Cuenca                |
| 658 | UC President's Postdoctoral Fellow              | Mia        | Maltz            | Division of Biomedical Sciences, UC Riverside |
| 659 | Botanist                                        | Rajaonah   | Mamy Tiana       | RBG Kew                                       |
| 660 | Executive Director                              | Mark       | Mandica          | The Amphibian Foundation                      |
| 661 | MSc. Candidate                                  | Roshni     | Mangar           | The University of British                     |
| 662 | Distinguished Research Professor                | Marc       | Mangel           | University of California Santa Cruz           |
| 663 | Professor                                       | Judith     | Mank             | Univeristy of British Columbia                |
| 664 | Biologist                                       | Rossana    | Manosalvas       | Independent                                   |
| 665 | Assistant Professor                             | Ben        | Manski           | George Mason University                       |
| 666 | Director National Amphibian Conservation Center | Ruth       | Marcec-Greaves   | Detroit Zoological Society                    |
| 667 | Biologist                                       | Nicole     | Marchan          | Asociación Nahual                             |
| 668 | post-doctor project                             | Cláudio C. | Maretti          | Geography Department, University of São Paulo |
| 669 | Dr. In Fires Management and Ecology             | Ana        | Mariscal         | SLU University                                |
| 670 | Graduate                                        | Deborah    | Marock           | Birkbeck College, London University           |
| 671 | Associate Research Scientist                    | Charles    | Marsh            | Yale University                               |
| 672 | Research Wildlife Biologist                     | Chester    | Martin           | Mississippi Bat Working Group                 |
| 673 | Researcher                                      | Maxwell    | Martin           | University of Massachusetts Boston            |
| 674 | Citizen Scientist                               | Eugene     | Martin           | iNaturalist                                   |
| 675 | Graduate Research Assistant                     | Valerie    | Martin           | Utah State University                         |
| 676 | Environmental Specialist I                      | Michael    | Martin           | North Carolina Wildlife Resources Commission  |
| 677 | Biologist                                       | Daniel     | Martínez         | Independent                                   |
| 678 | Geochemist, Member of Executive Board           | Catherine  | Martinson        | WWF Switzerland                               |

Científicos preocupados por la protección de Los Cedros

|     |                                                           |          |             |                                                                     |
|-----|-----------------------------------------------------------|----------|-------------|---------------------------------------------------------------------|
| 679 | Field Technician                                          | Mac      | Marzolini   | Scales Nature Park                                                  |
| 680 | Director                                                  | Arturo   | Massol      | Casa Pueblo (Adjuntas, Puerto Rico)                                 |
| 681 | Country Director-DR Congo                                 | Daniel   | Mastaki     | Intellectual Decisions on Environmental Awareness Solutions (IDEAS) |
| 682 | Researcher and Analyst                                    | Samuel   | Matey       | SustainaMetric                                                      |
| 683 | Professor of Environmental Biology                        | Fiona    | Mathews     | University of Sussex                                                |
| 684 | Academic coordinator                                      | Riccardo | Mattea      | Alliance for a Sustainable                                          |
| 685 | Associate Professor                                       | Philip   | Matthews    | University of British Columbia                                      |
| 686 | Josiah Meigs Distinguished Teaching Professor of Genetics | Rodney   | Mauricio    | University of Georgia                                               |
| 687 | Research Fellow                                           | Sean     | Maxwell     | The University of Queensland                                        |
| 688 | Biologist, Biodiversity Research Director (Ecuador)       | Ross     | Maynard     | The Biodiversity group                                              |
| 689 | Outreach Educator/Citizen Scientist                       | Arlene   | Maynard     | iNaturalist/Animal Adventures                                       |
| 690 | Citizen Scientist                                         | Steven   | Mayo        | iNaturalist                                                         |
| 691 | PhD, Doctor                                               | Pedro    | Mayor       | Universidad Autónoma de Brcelona                                    |
| 692 | Ecologist                                                 | Nicholas | McCarney    | Sycamore Park District                                              |
| 693 | Member,                                                   | Bonnie   | McCay       | U.S. National Academy of Sciences                                   |
| 694 | Citizen Scientist                                         | Kat      | McConnell   | iNaturalist                                                         |
| 695 | Assistant professor                                       | Shawn    | McCracken   | Texas A&M - Corpus Christi                                          |
| 696 | Biologist                                                 | Pearson  | McGovern    | ACI                                                                 |
| 697 | Professor of Conservation Science and Policy              | Philip   | McGowan     | Newcastle University, UK                                            |
| 698 | Senior Scientist                                          | David    | McGrath     | Earth Innovation Institute                                          |
| 699 | Associate Professor                                       | Krista   | McGuire     | University of Oregon                                                |
| 700 | Wildlife Biologist                                        | Sean     | McHugh      | Bergeron Everglades Foundation                                      |
| 701 | DVM                                                       | Katie    | McInnis     | IWRC                                                                |
| 702 | Citizen Scientist                                         | Naman    | Mehndiratta | iNaturalist                                                         |
| 703 | Biological science technician                             | Alex     | Meinders    | USFWS                                                               |
| 704 | Teacher                                                   | Lorena   | Mejia       | Universidad San Francisco de Quito                                  |
| 705 | Analytics Manager                                         | Zach     | Mellender   | Omaha Zoological Society                                            |
| 706 | BSc Applied ecology                                       | Pablo    | Melo        | USFQ                                                                |
| 707 | postdoc                                                   | Lilian   | Melo        | UNILA                                                               |
| 708 | recently got PhD degree                                   | Patricio | Mena        | University of Wageningen                                            |
| 709 | Profesional Analista en Conservación de la Biodiversidad  | Mariana  | Méndez      | Administración de Parques Nacionales                                |

Científicos preocupados por la protección de Los Cedros

|     |                                                |            |                   |                                                            |
|-----|------------------------------------------------|------------|-------------------|------------------------------------------------------------|
| 710 | PhD candidate                                  | Angela M   | Mendoza Henao     | Universidad Nacional Autónoma de México                    |
| 711 | Founding Director                              | Jax        | Metcalfe          | Poaching Prevention                                        |
| 712 | Invasive Animal Biologist                      | Edward     | Metzger           | South Florida Water Management District                    |
| 713 | Dr                                             | Kyle       | Meyer             | UC-Berkeley, Dept of Integrative Biology                   |
| 714 | Assistant professor                            | Sean       | Michaletz         | The University of British                                  |
| 715 | MSc                                            | Juan       | Millan            | Neotropical Primate Conservation Colombia.                 |
| 716 | PhD Candidate, Principle Investigator          | Ian        | Miller            | Princeton University, Rocky Mountain Biological Laboratory |
| 717 | Senior Program Officer                         | Philip     | Miller            | IUCN SSC Conservation Planning Specialist Group            |
| 718 | Postdoctoral Fellow                            | Susan      | Miller            | University                                                 |
| 719 | Veterinary Technician                          | Zach       | Mills             | Milwaukee Zoo                                              |
| 720 | Professor                                      | Bill       | Milsom            | University of British Columbia                             |
| 721 | Researcher                                     | Dmitri     | Minkin            | Universitat Autònoma de Barcelona                          |
| 722 | Magister                                       | Mahia      | Minteguiga        | Udelar                                                     |
| 723 | Environmental planner                          | Nicola     | Mitchard          | Environment Agency                                         |
| 724 | National Assistant Manager                     | Francisco  | Mitogo            | Bioko Biodiversity Protection Program                      |
| 725 | Chief Conservation Officer                     | Russell    | Mittermeier       | Global Wildlife Conservation                               |
| 726 | Co-Chair IUCN/SSC Equid Specialist Group       | Patricia D | Moehlman          | Columbia University                                        |
| 727 | Assistant Professor                            | Yamilé     | Molina            | University of Illinois at Chicago                          |
| 728 | Dr.                                            | Kieran     | Monaghan          | Universidade de Aveiro, Portugal                           |
| 729 | PhD Candidate                                  | Cristian   | Montalvo Mancheno | University of Tasmania                                     |
| 730 | Dr                                             | Bernadette | Montanari         | Centre for Biocultural Diversity, University of Kent       |
| 731 | Assistant Professor of Biology                 | Javier     | Monzon            | Pepperdine University                                      |
| 732 | Environmental Scientist                        | Teresa     | Moody             | Three Oaks Engineering                                     |
| 733 | Professor of Biodiversity                      | Arne       | Mooers            | Simon Fraser University, Canada                            |
| 734 | Professor                                      | Kailen     | Mooney            | University of California                                   |
| 735 | Biologist                                      | Sarah      | Moore             | USACE                                                      |
| 736 | Engineer in Biodiversity and Genetic Resources | Belen      | Morales           | Universidad Indoamerica                                    |
| 737 | MD, MSc Human Nutrition LSHTM                  | Marcelo    | Moreano           | Pontifical Catholic University of Ecuador                  |
| 738 | Miss                                           | Marcia     | Moreira           | Welsh Mountain Zoo - National Zoo of Wales                 |
| 739 | PhD Candidate                                  | Juan Isaac | Moreira Hernandez | University of Missouri-St. Louis                           |
| 740 | Director Tesoro Escondido Reserve              | Citlalli   | Morelos           | Fundación Jocotoco                                         |
| 741 | Research Technician                            | Evan       | Morien            | University of British Columbia                             |

Científicos preocupados por la protección de Los Cedros

|     |                                                                  |             |                |                                                                     |
|-----|------------------------------------------------------------------|-------------|----------------|---------------------------------------------------------------------|
| 742 | Biology                                                          | Nolan       | Morris         | Lovett                                                              |
| 743 | Graduate student                                                 | Megan       | Morrison       | UW-Madison                                                          |
| 744 | PhD                                                              | Paola       | Moscoso        | Naturaleza y Arte                                                   |
| 745 | MSc                                                              | Diego       | Mosquera       | Universidad San Francisco de Quito                                  |
| 746 | Professor and Canada research Chair                              | Carmel      | Mothersill     | McMaster University                                                 |
| 747 | Professor                                                        | Patricia    | Mothes         | Escuela Politécnica Nacional, Instituto Geofísico                   |
| 748 | Associate Professor                                              | Nathan      | Muchhala       | University of Missouri - St. Louis                                  |
| 749 | Citizen Scientist                                                | Daniel      | Mueller        | iNaturalist                                                         |
| 750 | PhD, Civil Engineering                                           | John        | Mulrow         | University of Illinois at Chicago                                   |
| 751 | PhD                                                              | Ruth        | Muñiz          | FAUNAETUS / Universidad Alicante                                    |
| 752 | Dr                                                               | Sergio      | Muñoz          | Humane Society International                                        |
| 753 | PhD candidate                                                    | Gabriel     | Muñoz          | Concordia University                                                |
| 754 | Associate professor                                              | Priscilla   | Muriel         | Pontificia Universidad Católica del Ecuador                         |
| 755 | Research Associate                                               | John        | Murphy         | Field Museum                                                        |
| 756 | Graduate student                                                 | Alex        | Murray         | University of Texas at Arlington                                    |
| 757 | Technical Advisor                                                | James       | Mwamodenyi     | Taita Taveta Wildlife Forum                                         |
| 758 | Professor                                                        | Eric        | Nagy           | University of Virginia, Mountain Lake Biological Station            |
| 759 | Founder & Director                                               | Dr Rosalind | Napleton-King  | Empowering Collaborative Partnerships                               |
| 760 | Coordinator, Rare & Endangered Species Conservation Unit (RESCU) | Goutam      | Narayan        | EcoSystems-India                                                    |
| 761 | Research Manager                                                 | Claire      | Narraway       | Earthwatch Europe                                                   |
| 762 | Transit/ Fleet Supervisor                                        | Ray         | Navarra        | Toronto Zoo                                                         |
| 763 | PhD Candidate                                                    | Sara        | Nawaz          | University of British Columbia                                      |
| 764 | Biodiversity Assessment Coordinator                              | Kelsey      | Neam           | Global Wildlife Conservation                                        |
| 765 | Acting Director                                                  | Nicky       | Needham        | British and Irish Association of Zoos and Aquariums                 |
| 766 | Director                                                         | A.          | Neils          | Conservation CATalyst                                               |
| 767 | Research Assistant                                               | Aaron       | Nelson         | University of Oregon                                                |
| 768 | Professor                                                        | Jan         | Nespor         | The Ohio State University                                           |
| 769 | Professor of International Relations                             | Peter       | Newell         | University of Sussex                                                |
| 770 | Ecologist                                                        | Bruce       | Newhouse       | Salix Associates                                                    |
| 771 | Senior Adviser                                                   | Kafi        | Nidamudin Adam | Ministry of Environment, Agriculture and Climate Change             |
| 772 | Independent researcher                                           | Jonas       | Nilsson        | Wildsumaco Lodge                                                    |
| 773 | Affiliate                                                        | Akane       | Nishimura      | Center for Tropical Research - University of California Los Angeles |

Científicos preocupados por la protección de Los Cedros

|     |                                                                       |           |              |                                                                         |
|-----|-----------------------------------------------------------------------|-----------|--------------|-------------------------------------------------------------------------|
| 774 | Professor                                                             | Selene    | Nogueira     | Universidade Estadual de Santa Cruz                                     |
| 775 | MS Student                                                            | Logan     | Novak        | Chicago Botanic Garden and Northwestern University                      |
| 776 | Research Fellow                                                       | Elizabeth | Nowlin       | Duke University                                                         |
| 777 | Master in Science                                                     | Diego     | Nuñez Glutz  | MGAP Uruguay                                                            |
| 778 | Student                                                               | Miftah    | Nur Fauzan   | Gadjah Mada University                                                  |
| 779 | Conservationist                                                       | Felicien  | Nyenty       | Ministry of forestry and wildlife, Cameroon                             |
| 780 | Biologist                                                             | Catalina  | Ocampo       | Neotropical Primate Conservation Colombia                               |
| 781 | Senior Biologist                                                      | Lisa      | Odonnell     | City of Austin                                                          |
| 782 | Citizen Scientist                                                     | Greyson   | Offermann    | iNaturalist                                                             |
| 783 | PhD Biology                                                           | Ricardo   | Ojeda        | IADIZA CONICET                                                          |
| 784 | Research Associate<br>Professor of Anthropology<br>and Global Affairs | Rahul     | Oka          | University of Notre Dame                                                |
| 785 | Professor                                                             | Nora      | Oleas        | UTI                                                                     |
| 786 | Prof.                                                                 | Alejandro | Olivera      | Universidad Autonoma de Baja California Sur                             |
| 787 | Professor Emeritus of Anthropology                                    | Anthony   | Oliver-Smith | University of Florida                                                   |
| 788 | Director                                                              | Robert    | Orenstein    | The Biodiversity Group                                                  |
| 789 | Citizen Scientist                                                     | Nancy     | Orr          | The Biodiversity Group                                                  |
| 790 | Speaker                                                               | Edison    | Ortiz        | Neighbors of Alambi river, at Chocó Andino Biosphere Reserve            |
| 791 | Professor                                                             | Sarah     | Otto         | University of British Columbia                                          |
| 792 | PhD Candidate                                                         | Ekaterina | Ovsyanikova  | University of Queensland, Australia                                     |
| 793 | Engineer in Biotechnology                                             | Santiago  | Padilla      | Universidad San Francisco de Quito                                      |
| 794 | Licenciado en Ciencias Biológicas                                     | Carlos A. | Padilla      | Estación Científica Yasuní, Pontificia Universidad Católica del Ecuador |
| 795 | PhD                                                                   | Mónica    | Páez         | Universidad Indoamérica                                                 |
| 796 | Professor                                                             | Monica    | Páez         | Universidad Indoamérica                                                 |
| 797 | Prof.                                                                 | Theo      | Pagel        | Cologne Zoo                                                             |
| 798 | Associate Professor                                                   | Young     | Paik         | Jeju National University                                                |
| 799 | Director Ejecutivo                                                    | Bruno     | Paladines    | Fundación Naturaleza y Cultura Ecuador                                  |
| 800 | Postdoc                                                               | Anne      | Panetta      | University of Colorado, Boulder                                         |
| 801 | Senior Curator                                                        | Matthias  | Papies       | Tierpark Berlin                                                         |
| 802 | Assistant Professor                                                   | Laura     | Parfrey      | University of British Columbia                                          |
| 803 | Citizen Scientist                                                     | Peyton    | Parker       | iNaturalist                                                             |
| 804 | Conservation Social Scientist                                         | Taylor    | Parker       | Clemson University                                                      |
| 805 | Biologist                                                             | David     | Parra        | FLACSO                                                                  |

Científicos preocupados por la protección de Los Cedros

|     |                                                   |             |                 |                                                                        |
|-----|---------------------------------------------------|-------------|-----------------|------------------------------------------------------------------------|
| 806 | Director/Conservationist                          | Jemima      | Parry-Jones Mbe | International Centre for Birds of Prey                                 |
| 807 | Professor of Physics                              | Raghuveer   | Parthasarathy   | University of Oregon                                                   |
| 808 | citizen scientist                                 | Thomas      | Pascale         | iNaturalist                                                            |
| 809 | Citizen scientist                                 | Jamie       | Passenger       | iNaturalist                                                            |
| 810 | Fulbright Postdoctoral Researcher                 | Karabi      | Pathak          | The Ohio State University USA                                          |
| 811 | Epidemiologist                                    | Sonal       | Pathak          | DataRev                                                                |
| 812 | MacArthur Curator                                 | Bruce       | Patterson       | Field Museum of Natural History                                        |
| 813 | Caring human                                      | Cherry      | Payne           | Earth Resident                                                         |
| 814 | P.G Dip Wildlife Management                       | Rachel      | Peach           | University of Otago                                                    |
| 815 | Senior Curator                                    | Paul        | Pearce-Kelly    | Zoological Society of London                                           |
| 816 | Dr                                                | Mika        | Peck            | University of Sussex                                                   |
| 817 | Student                                           | Emma        | Peister         | SUNY College of Environmental Science and Forestry                     |
| 818 | Bsc.                                              | Emilia      | Peñaherrera     | Universidad San Francisco de Quito                                     |
| 819 | MSc Zoology Student                               | Rachael     | Penman          | University of British Columbia                                         |
| 820 | PhD Student                                       | Carla       | Pereira García  | ICM-CSIC                                                               |
| 821 | PhD Candidate in Conservation Science             | Katharina   | Perez           | University of Queensland                                               |
| 822 | PhD Student                                       | Christian   | Perez           | University of Missouri, Columbia                                       |
| 823 | Wildlife Biologist                                | Michael     | Perkins         | NC Wildlife Resources Commission                                       |
| 824 | Transporter                                       | Craig       | Peterson        | Hertz                                                                  |
| 825 | independant                                       | Jean-Claude | Petit           | independant                                                            |
| 826 | Zoologist                                         | Rebekah     | Pettit          | Three Jays tortoise sanctuary                                          |
| 827 | Wildlife Specialist                               | Clarice     | Pfalzer         | White Oak Conservation Foundation                                      |
| 828 | Career instructor                                 | Laurel      | Pfeifer Meister | University of Oregon                                                   |
| 829 | Head of Conservation (PhD)                        | Ben         | Phalan          | Parque das Aves, Brazil                                                |
| 830 | Post Graduate Certificate in Science Education    | Suzanne     | Philipps        | Department of Education                                                |
| 831 | Sole trader                                       | Jeremy      | Philipps        | Mr Phil's Science                                                      |
| 832 | Dr.                                               | Mark        | Pilgrim         | Chester zoo                                                            |
| 833 | Doris Duke Chair of Conservation                  | Stuart      | Pimm            | Duke University                                                        |
| 834 | Professor                                         | Evelyn      | Pinkerton       | Simon Fraser University, School of Resource & Environmental Management |
| 835 | Mitacs Accelerate Industrial Post Doctoral Fellow | Jake        | Pirkkanen       | Laurentian University                                                  |
| 836 | Conservation Ecologist & Assistant Professor      | Amber       | Pitt            | Trinity College                                                        |
| 837 | Head KBA Secretariat                              | Andy        | Plumptre        | KBA Partnership and BirdLife International                             |



Científicos preocupados por la protección de Los Cedros

|     |                                                |                    |                |                                                                                |
|-----|------------------------------------------------|--------------------|----------------|--------------------------------------------------------------------------------|
| 838 | Dr                                             | Gianluca           | Polgar         | Water Research Institute IRSA<br>VERBANIA                                      |
| 839 | Instructor and Research<br>Associate           | Tobias             | Policha        | University of Oregon                                                           |
| 840 | Regional Key Biodiversity<br>Areas Coordinator | Riley              | Pollom         | Wildlife Conservation Society<br>Canada                                        |
| 841 | Science Director                               | Monique            | Pool           | Green Heritage Fund Suriname                                                   |
| 842 | Professor                                      | Hugh               | Possingham     | University of Queensland                                                       |
| 843 | Dr. PhD                                        | Mayte              | Pozo           | Acuario de Zaragoza, Aragón,<br>Spain                                          |
| 844 | Biólogo                                        | Glenda             | Pozo           | Instituto Nacional de<br>Biodiversidad                                         |
| 845 | Professor of Biology,<br>Emerita               | Mary               | Price          | University of California, Riverside                                            |
| 846 | Professor                                      | Trevor             | Price          | University of Chicago Dept. of<br>Ecology and Evolutionary Biology             |
| 847 | Rubinstein Professor                           | Anne               | Pringle        | University of Wisconsin-Madison                                                |
| 848 | Antropólogo                                    | Jose               | Proaño         | Land is Life                                                                   |
| 849 | Profesora                                      | Claudia            | Puerta Silva   | Universidad de Antioquia                                                       |
| 850 | Licenciado en Biología                         | Alberto            | Puertas        | Universidad San Francisco de<br>Quito                                          |
| 851 | Médico Veterinario                             | Ernesto            | Pulgar Hahn    | Fundación Ecodiversa                                                           |
| 852 | Population Biologist                           | Andrea             | Putnam         | San Diego Zoo Global                                                           |
| 853 | Senior Programme<br>Assistant                  | Khandakar Mohammad | Qayum          | IUCN, International Union for<br>Conservation of Nature                        |
| 854 | PhD student                                    | Philip             | Queller        | University of Texas at Austin                                                  |
| 855 | Bióloga                                        | Amanda             | Quezada        | Museo de Zoología de la<br>Universidad del Azuay                               |
| 856 | Professor                                      | Donald             | Quicke         | Chulalongkorn University                                                       |
| 857 | Visiting Faculty                               | Chitra             | R              | Azim Premji University,<br>Bangalore, India                                    |
| 858 | Professor                                      | Claudia            | Radel          | Utah State University                                                          |
| 859 | Ms                                             | Roopali            | Raghavan       | Wildlife Reserves Singapore                                                    |
| 860 | Professor                                      | Robert             | Raguso         | Cornell University                                                             |
| 861 | PhD                                            | Aghaghia           | Rahimzadeh     | UCBerkeley                                                                     |
| 862 | -                                              | Alin               | Rahmah Yuliani | -                                                                              |
| 863 | Deputy Chair: Species<br>Survival Commission   | Domitilla          | Raimondo       | IUCN Species Survival and South<br>African National Biodiversity<br>Institute. |
| 864 | Associate Professor                            | Peter              | Ralph          | University of Oregon                                                           |
| 865 | Postdoctoral Researcher                        | Duncan             | Ralph          | Fred Hutchinson Cancer Research<br>Center                                      |
| 866 | Research Ecologist<br>Emeritus                 | C. John            | Ralph          | US Forest Service, Pacific SW<br>Research Station                              |
| 867 | Research Fellow                                | Cristina           | Ramalho        | The University of Western<br>Australia                                         |
| 868 | Professor Emeritus                             | William            | Ramey          | University of British Columbia                                                 |

Científicos preocupados por la protección de Los Cedros

|     |                                                                    |               |                 |                                            |
|-----|--------------------------------------------------------------------|---------------|-----------------|--------------------------------------------|
| 869 | Member                                                             | Karla         | Ramirez         | Neotropical Primate Conservatio - Peru     |
| 870 | Professor/Researcher                                               | Giovani       | Ramón           | Universidad San Francisco de Quito         |
| 871 | Natural Resource Planner                                           | Lannette      | Rangel          | US Forest Service                          |
| 872 | Professor of Climate Science                                       | Chris         | Rapley          | University College London                  |
| 873 | Prof of Climate Science                                            | Chris         | Rapley          | UCL                                        |
| 874 | Prof                                                               | Sergio        | Rasmann         | University of Neuchâtel                    |
| 875 | Citizen Scientist                                                  | Sid           | Ratan           | iNaturalist                                |
| 876 | Executive Director, Sustainable LA Grand Challenge                 | Casandra      | Rauser          | University of California, Los Angeles      |
| 877 | Professor                                                          | Mark          | Rauzon          | Laney College, Oakland CA                  |
| 878 | President emeritus                                                 | Peter         | Raven           | Missouri Botanical Garden                  |
| 879 | Ph.D. student                                                      | Ernesto       | Razuri Gonzales | University of Minnesota                    |
| 880 | Associate Professor of Biology                                     | Dawn          | Reding          | Luther College                             |
| 881 | PhD Candidate                                                      | Paul          | Reed            | University of Oregon                       |
| 882 | Researcher                                                         | Thomas        | Reed            | Private Research                           |
| 883 | Chief                                                              | Jim           | Reed            | Hydrologic Group                           |
| 884 | Associate Professor of Sociology, Africana Studies, and Philosophy | Jean-Pierre   | Reed            | Southern Illinois University at Carbondale |
| 885 | citizen scientist                                                  | Sophie        | Rees            | INaturalist                                |
| 886 | RNDr., CSc.                                                        | Ivan          | Rehak           | Prague Zoo                                 |
| 887 | Consultant                                                         | Jose          | Rehbein         | The World Bank                             |
| 888 | Biologist                                                          | Sandra        | Reichler        | Zoo Heidelberg                             |
| 889 | Postdoctoral Research Fellow                                       | Kelsey        | Reider          | Murray State University                    |
| 890 | Director BCBI                                                      | Gay           | Reinartz        | WWF-US                                     |
| 891 | Teacher                                                            | Mariana       | Reis            | Kingdom school                             |
| 892 | PhD Student                                                        | Veronica      | Relano          | University of British Columbia.            |
| 893 | Senior Science Officer                                             | Claire        | Relton          | Endangered Wildlife Trust                  |
| 894 | Head Mycologist                                                    | Charlotte     | Renninger       | MycoUprrhizal                              |
| 895 | PhD Candidate                                                      | Daniela       | Requena Suarez  | Wageningen University and Research         |
| 896 | Postgraduate research                                              | Laura Mariana | Reyes           | Queen Mary University of London            |
| 897 | Citizen Scientist                                                  | Rachel        | Reyes           | iNaturalist                                |
| 898 | Assistant professor                                                | Carolina      | Reyes-Puig      | Universidad San Francisco de Quito         |
| 899 | Director                                                           | Alex          | Reynolds        | BVP Siempre Verde                          |
| 900 | Professor                                                          | John          | Reynolds        | Dr.                                        |
| 901 | Ectotherm Keeper/ conservation biologist                           | Nick          | Reynolds        | Auckland Zoo                               |

Científicos preocupados por la protección de Los Cedros

|     |                                       |            |               |                                                                         |
|-----|---------------------------------------|------------|---------------|-------------------------------------------------------------------------|
| 902 | Environmental Health Specialist       | Alissa     | Rice          | Shelby county Government employee                                       |
| 903 | author / endangered species expert    | Matthew    | Richardson    | None                                                                    |
| 904 | Ecological Field Technician           | Joseph     | Ricketts      | National Ecological Observatory Network                                 |
| 905 | Director, Disease Investigations      | Bruce      | Rideout       | Institute for Conservation Research, San Diego Zoo Global               |
| 906 | President                             | Robert     | Ridgely       | Rainforest Trust                                                        |
| 907 | Graduate Student                      | Noa        | Rigoudy       | ENS de Lyon - University Claude Bernard Lyon 1 - Lyon Universities      |
| 908 | Dr.                                   | Blanca     | Rios-Touma    | Grupo de Investigación en Biodiversidad, Medio Ambiente y Salud, BIOMAS |
| 909 | Research Fellow                       | Alison     | Ritchie       | University of Western Australia                                         |
| 910 | Ingeniero                             | Jordi      | Rivera        | Universidad Indoamérica                                                 |
| 911 | Research Assistant                    | Nicola     | Rivers        | Monash University                                                       |
| 912 | Dr Leslie Roberson                    | Leslie     | Roberson      | University of Queensland, Australia                                     |
| 913 | Senior Instructor                     | Dina       | Roberts       | CIEE                                                                    |
| 914 | Conservation Biology Major            | William    | Robertson     | Middlebury College                                                      |
| 915 | Dr. Nathan J. Robinson                | Nathan     | Robinson      | Purdue University                                                       |
| 916 | Assistant Professor                   | David      | Rodriguez     | Texas State University-Biology                                          |
| 917 | Magister                              | Jorge      | Rodríguez     | Conservation Planing Specialist Group/Fundación Pro Zoológicos          |
| 918 | Professor                             | Patricio   | Rojas         | Universidad San Francisco de Quito                                      |
| 919 | Ph.D. student                         | Omar       | Rojas-Padilla | Pontificia Universidade Católica do Rio Grande do Sul                   |
| 920 | Lic. Geografía y estudios ambientales | Nadia      | Romero        | Colectivo de Geografía Crítica del Ecuador                              |
| 921 | postdoctoral researcher               | Gonçalo M. | Rosa          | IoZ, ZSL & cE3c (FCUL)                                                  |
| 922 | Lecturer                              | Sarah      | Rose-Jensen   | George Washington University                                            |
| 923 | Senior Advisor, Freshwater & Marine   | Risa       | Rosenberg     | World Wide Fund for Nature (WWF-Sweden)                                 |
| 924 | Student and researcher                | Tasman     | Rosenfeld     | Yale University                                                         |
| 925 | Professor                             | Jane       | Roskams       | University of British Columbia                                          |
| 926 | Professor Emerita                     | Bitty A.   | Roy           | University of Oregon                                                    |
| 927 | Graduate Research                     | Jess       | Rubin         | University of Vermont & MycoEvolve                                      |
| 928 | Professor                             | Jennifer   | Rudgers       | Dept Biology University of New Mexico                                   |
| 929 | Post-doctoral researcher              | Clara      | Ruiz-Gonzalez | Institut de Ciències del Mar (ICM-CSIC) Barcelona                       |
| 930 | M.Sc. Candidate                       | Andrej     | Rusin         | McMaster University                                                     |

Científicos preocupados por la protección de Los Cedros

|     |                                                  |              |              |                                                    |
|-----|--------------------------------------------------|--------------|--------------|----------------------------------------------------|
| 931 | County Coordinator                               | Travis       | Russell      | Pennsylvania Amphibian and Reptile Survey          |
| 932 | Student                                          | Alessandra   | Russo        | College of the Redwoods                            |
| 933 | Research Assistant                               | Dalley-Divin | Saa-Sita     | University of Kinshasa                             |
| 934 | Dr.                                              | Joana        | Sabino Pinto | University of Groningen                            |
| 935 | Senior lecturer                                  | Uma          | Sachi        | Republic Polytechnic                               |
| 936 | Biologist                                        | Antonio W.   | Salas        | Independent                                        |
| 937 | Lic. Biotecnologia                               | Laura        | Salas        | Universidad Nacional Arturo Jauretche              |
| 938 | David Salazar                                    | David        | Salazar      | Universidad Tecnológica Indoamérica                |
| 939 | Biologist                                        | Alfredo      | Salazar      | PUCE Pontificia Universidad Católica del Ecuador   |
| 940 | Executive Director                               | Dennis       | Salvador     | Philippine Eagle Foundation                        |
| 941 | Citizen Scientist                                | Benjamin     | Sammel       | iNaturalist                                        |
| 942 | Associate Researcher - Ornithology               | Manuel       | Sanchez      | Instituto Ecuatoriano de la Biodiversidad          |
| 943 | Biologist                                        | Juan C.      | Sánchez      | Universidad Nacional de Colombia                   |
| 944 | PhD candidate in Zoology                         | Linnea       | Sandell      | University of British Columbia                     |
| 945 | Dr                                               | Chris        | Sandom       | University of Sussex                               |
| 946 | PhD candidate                                    | Anna         | Santo        | University of British Columbia                     |
| 947 | zookeeper                                        | Jesse        | Saofia       | Auckland Zoo                                       |
| 948 | Professor of Mountain Science                    | Fausto       | Sarmiento    | University of Georgia, Athens, GA. USA.            |
| 949 | Professor of Sociology and Environmental Studies | Stephen      | Scanlan      | Ohio University                                    |
| 950 | Dr                                               | Valentina    | Scarponi     | University of Sussex                               |
| 951 | Senior Researcher                                | Martin       | Schaefer     | University of Freiburg                             |
| 952 | X-ray tech                                       | Lauren       | Schaupp      | Chiropractic clinic                                |
| 953 | Veterinarian                                     | Luca         | Schick       | ITAW School of veterinary medicine Hanover         |
| 954 | Senior Career Instructor of Biology              | Debbie       | Schlenoff    | University Oregon                                  |
| 955 | Professor                                        | Dolph        | Schluter     | University of British Columbia                     |
| 956 | Dr.                                              | Benedikt     | Schmid       | University of Freiburg                             |
| 957 | Professor Emeritus                               | David        | Schmidly     | University of New Mexico and Texas Tech University |
| 958 | Master                                           | Britta       | Schmidt      | University of Sussex                               |
| 959 | Professor Emerita                                | Johanna      | Schmitt      | UC Davis                                           |
| 960 | Graduate researcher                              | Tristan      | Schramer     | Clemson University                                 |
| 961 | Dr.                                              | Stewart      | Schultz      | University of Zadar                                |
| 962 | Author/Environmental Journalist                  | Judith D.    | Schwartz     | Chelsea Green Publishing                           |
| 963 | Assistant Professor                              | Birgit       | Schwarz      | York University                                    |
| 964 | Dr                                               | Tamar        | Schwarz      | Cefas                                              |

Científicos preocupados por la protección de Los Cedros

|     |                                                                             |               |             |                                                                          |
|-----|-----------------------------------------------------------------------------|---------------|-------------|--------------------------------------------------------------------------|
| 965 | MSc Environmental Sustainability                                            | Geordie       | Scully      | University of Edinburgh                                                  |
| 966 | Finance Business Support Co-ordinator                                       | Karen         | Searle      | Auckland Zoo                                                             |
| 967 | MSc Environmental Change                                                    | Christine     | Seaward     | Portsmouth university                                                    |
| 968 | Biologist                                                                   | Rachel        | Sechan      | Rachel Sechan Biological                                                 |
| 969 | CEO                                                                         | Wes           | Sechrest    | Global Wildlife Conservation                                             |
| 970 | Researcher                                                                  | Keerthikrutha | Seetharaman | University of British Columbia                                           |
| 971 | PhD, Cloud forest reserve manager                                           | Sylvia        | Seger       | Siempre Verde,Ecuador                                                    |
| 972 | Professor, researcher                                                       | Monica        | Segovia     | Escuela Politécnica Nacional - Instituto Geofísico                       |
| 973 | Professor of Political Science, Lucy King Brown Chair                       | Eric          | Selbin      | Southwestern University                                                  |
| 974 | Student                                                                     | Max           | Seldes      | University of Georgia                                                    |
| 975 | Co-investigator                                                             | Hannah        | Sender      | University College London                                                |
| 976 | Ms.. Biology                                                                | Eduardo D     | Sendra      | ILPLA                                                                    |
| 977 | Ms                                                                          | Eduardo D     | Sendra      | 19                                                                       |
| 978 | Database Coordinator                                                        | Yanet         | Sepulveda   | Stop Extinction                                                          |
| 979 | Assistant professor with tenure                                             | Laura         | Serrano     | University of Sevilla                                                    |
| 980 | Wildlife Program Corrdinator                                                | Gregg         | Servheen    | Retired, Idaho Department of Fish and Game                               |
| 981 | Citizen Scientist                                                           | Michael       | Setzle      | iNaturalist                                                              |
| 982 | Assistant Professor                                                         | Verena        | Seufert     | Vrije Universiteit (VU) Amsterdam                                        |
| 983 | Assistant Professor, Director of the Restoration of Natural Systems Program | Nancy         | Shackelford | University of Victoria                                                   |
| 984 | Researcher                                                                  | Erin          | Shamley     | Southern Illinois University                                             |
| 985 | Dr                                                                          | Sam           | Shanee      | Neotropical Primate Conservation                                         |
| 986 | Retired Additional Director General Forests(Wildlife)                       | Suresh        | Sharma      | Ministry of Environment ,Forests and Climate Change ,Government of India |
| 987 | Zoo Herpetologist                                                           | Steven        | Sharp       | Fresno's Chaffee Zoo                                                     |
| 988 | Professor of Biology                                                        | Dr. Steve     | Sheffield   | Bowie State University                                                   |
| 989 | Ph.D. candidate                                                             | Katherine     | Shek        | Institute of Ecology and Evolution, University of Oregon                 |
| 990 | Freelance Conservation Consultant                                           | Rob           | Sheldon     | RDS Conservation                                                         |
| 991 | Eastern Region Field Biologist                                              | Nathan        | Shepard     | North Carolina Natural Heritage Program                                  |
| 992 | Mr                                                                          | Mario         | Shimbov     | CPARG                                                                    |
| 993 | Wildlife Biologist                                                          | Jakob         | Shockey     | The Beaver Coalition                                                     |

Científicos preocupados por la protección de Los Cedros

|      |                                               |             |               |                                                               |
|------|-----------------------------------------------|-------------|---------------|---------------------------------------------------------------|
| 994  | Research Fellow                               | Jennifer    | Silcock       | University of Queensland                                      |
| 995  | Chairman                                      | Lee         | Simmons       | Omaha Zoo Foundation                                          |
| 996  | GIS & Remote sensing analyst                  | Chenay      | Simms         | South African National parks                                  |
| 997  | Student                                       | Vishal      | Singh         | St Xavier's College                                           |
| 998  | Biology Undergraduate                         | Noah        | Skinner       | Ohio University                                               |
| 999  | Postdoctoral Researcher                       | Mandy       | Slate         | University of Colorado, Boulder                               |
| 1000 | Dr                                            | Joanna      | Smallwood     | Sussex University                                             |
| 1001 | Senior Research Associate, Ecosystems Group   | Alison      | Smith         | University of Oxford, Environmental Change Institute          |
| 1002 | Principal Research Scientist                  | Winston     | Smith         | Institute of Arctic Biology, University of Alaska - Fairbanks |
| 1003 | Senior Environmental Scientist                | Ethan       | Smith         | Duke Energy                                                   |
| 1004 | Project lead                                  | Samantha    | Smith         | Sakaerat Conservation and Snake Education Team                |
| 1005 | Citizen scientist                             | Brittney    | Smith         | Inaturalist                                                   |
| 1006 | Research Scientist                            | Jo Anne     | Smith-Flueck  | Universidad Nacional del Comahue Argentina                    |
| 1007 | Biotechnologa                                 | Cintia      | Smus          | Fundación Pablo Cassará                                       |
| 1008 | Emeritus Professor of Geophysics              | David       | Smythe        | University of Glasgow, UK                                     |
| 1009 | Program officer                               | Andrew      | Snyder        | Global Wildlife Conservation                                  |
| 1010 | Field Ecologist                               | Alejandro   | Solano Ugalde | Fundación Imaymana                                            |
| 1011 | Environmental Consultant                      | Tim         | Songer        | Southern Nevada Environmental                                 |
| 1012 | Dr                                            | Sushil      | Sood          | SPIU, SPNF                                                    |
| 1013 | Associated Scientist                          | Anton       | Sorokin       | University of California Berkeley                             |
| 1014 | Professor                                     | Andrey      | Sorokin       | Medical College of Wisconsin                                  |
| 1015 | Universidad Veracruzana                       | Denise      | Spaan         | Instituto de Neuroetologia                                    |
| 1016 | Assistant Professor of Biology                | Marko       | Spasojevic    | University of California Riverside                            |
| 1017 | Director of Conservation                      | Brandon     | Speeg         | White Oak Conservation                                        |
| 1018 | Curator of Invertebrates                      | Edward      | Spevak        | Saint Louis Zoo                                               |
| 1019 | Dr.                                           | Annemarieke | Spitzen       | RAVON                                                         |
| 1020 | PhD                                           | Stefan      | Stadler       | Frankfurt Zoo                                                 |
| 1021 | Fishery Policy Analyst                        | William     | Stahnke       | NOAA National Marine Fisheries Service                        |
| 1022 | Chemist technician                            | Isaac       | Stanley       | 7 oaks pharmaceutical                                         |
| 1023 | Distinguished Professor Emerita               | Maureen     | Stanton       | University of California Davis                                |
| 1024 | Biologist                                     | Howard      | Stanton       | The Biodiversity Group                                        |
| 1025 | Environmental Anthropologist                  | Dayton      | Starnes       | University of Kentucky                                        |
| 1026 | Professor of Ecology and Evolutionary Biology | Stephen     | Stearns       | Yale University                                               |
| 1027 | Research Assistant                            | Ben         | Stegenga      | The Orianne Society                                           |
| 1028 | None                                          | Jon         | Stegenga      | Humanizing Through Story                                      |

Científicos preocupados por la protección de Los Cedros

|      |                                                               |             |                  |                                                          |
|------|---------------------------------------------------------------|-------------|------------------|----------------------------------------------------------|
| 1029 | PhD candidate                                                 | Emma        | Steigerwald      | The University of California, Berkeley                   |
| 1030 | Upper Elementary Guide                                        | Celia       | Steigerwald      | Montessori School                                        |
| 1031 | Data & Metrics Manager                                        | Carrie      | Stengel          | Global Wildlife Conservation                             |
| 1032 | Biologist                                                     | Claire      | Stenger          | Rincon Consultants                                       |
| 1033 | Dr                                                            | Peter       | Stevens          | Wild planet Trust                                        |
| 1034 | PhD Student                                                   | Danielle    | Stevenson        | University of California Riverside                       |
| 1035 | Dr                                                            | Angela      | Stevenson        | GEOMAR Kiel                                              |
| 1036 | Reader in Ecology                                             | Alan        | Stewart          | University of Sussex, UK                                 |
| 1037 | PhD Candidate                                                 | Phoebe      | Stewart-Sinclair | University of Queensland                                 |
| 1038 | Faculty Research Associate                                    | Daphne      | Stone            | Oregon State University                                  |
| 1039 | Founding Chair, Urban Sustainability Department               | Donald      | Strauss          | Antioch University Los Angeles                           |
| 1040 | Professor                                                     | Sharon      | Strauss          | UC Davis                                                 |
| 1041 | Research Fellow                                               | Martin      | Stringer         | Sustainable Minerals Institute, University of Queensland |
| 1042 | Director of Strategic Conservation                            | Simon       | Stuart           | Synchronicity Earth                                      |
| 1043 | student                                                       | Leila       | Stutz            | university of Neuchâtel                                  |
| 1044 | Mr                                                            | Kevin       | Styles           | Science of life                                          |
| 1045 | Professor                                                     | Esteban     | Suárez           | Universidad San Francisco de Quito                       |
| 1046 | Citizeb Scientist                                             | Alex        | Subialdea        | iNaturalist                                              |
| 1047 | Lecturer                                                      | Chin        | Sun              | University of British Columbia                           |
| 1048 | Dr                                                            | Jill        | Sutcliffe        | Parishes Willdife Group                                  |
| 1049 | Associate Professor                                           | Kelly       | Sutherland       | Institute of Ecology and Evolution, University of Oregon |
| 1050 | Professor                                                     | Tracey      | Sutton           | Nova Southeastern University                             |
| 1051 | Assoc. Professor of Landscape Ecology                         | Jennifer    | Swenson          | Duke University                                          |
| 1052 | Founding Director, Tiputini Biodiversity Station              | Kelly       | Swing            | Universidad San Francisco de Quito                       |
| 1053 | professor                                                     | Judit       | Szabo            | Universidade Federal da Bahia                            |
| 1054 | Researcher                                                    | Megan       | Szojka           | University of British Columbia                           |
| 1055 | Assistant Professor of Anthropology and Environmental Studies | Renzo       | Taddei           | Federal University of São Paulo                          |
| 1056 | Director                                                      | Kazutoshi   | Takami           | Toyohashi Zoo                                            |
| 1057 | life student of science                                       | Teresa      | Talbott          | the universe of life                                     |
| 1058 | Scientist-G                                                   | Bibhab      | Talukdar         | Aaranyak                                                 |
| 1059 | Project Development and Resource Officer                      | Elyza Hazel | Tan              | Mindoro Biodiversity Conservation Foundation, Inc.       |
| 1060 | Head of Research Centre of Pacific Marine Resources           | Ricardo     | Tapilatu         | University of Papua (UNIPA)                              |
| 1061 | Mr                                                            | Cliff       | Tapp             | University of Sussex                                     |

Científicos preocupados por la protección de Los Cedros

|      |                                                                                      |           |                 |                                                                              |
|------|--------------------------------------------------------------------------------------|-----------|-----------------|------------------------------------------------------------------------------|
| 1062 | Dr Jeanne Tarrant -<br>Manager: Threatened<br>Amphibian Programme                    | Jeanne    | Tarrant         | Endangered Wildlife Trust                                                    |
| 1063 | Dr. (Honorary) of Science                                                            | Georgia   | Tasker          | Florida International University                                             |
| 1064 | Scientist                                                                            | Brad      | Taylor          | Rocky Mountain Biological<br>Laboratory                                      |
| 1065 | BSc (Hons) Biological<br>sciences, VetMB and in<br>process MSc Wild Animal<br>Health | Rachel    | Taylor          | Zoological Society of London                                                 |
| 1066 | Professor emeritus of<br>Botany                                                      | Iain      | Taylor          | University of British Columbia                                               |
| 1067 | Citizen Scientist                                                                    | Bob       | Taylor          | iNaturalist                                                                  |
| 1068 | PhD Candidate                                                                        | Anazélia  | Tedesco         | The University of Queensland                                                 |
| 1069 | Professor                                                                            | Markus    | Tellkamp        | Universidad Yachay Tech                                                      |
| 1070 | Research Associate,<br>Department of Natural<br>Resource Sciences                    | Leah      | Temper          | McGill University                                                            |
| 1071 | Director                                                                             | Peter     | Temple-Smith    | Australian Frozen Zoo                                                        |
| 1072 | Instructor, UF in<br>Madagascar                                                      | Michele   | Tennant         | University of Florida                                                        |
| 1073 | Senior Vice President                                                                | Joe       | Tetrault        | Fwc                                                                          |
| 1074 | Curator Emerita                                                                      | Margaret  | Thayer          | Field Museum of Natural History                                              |
| 1075 | Graduate Student                                                                     | Ian       | Theaker         | UBC IRES                                                                     |
| 1076 | PhD candidate in Zoology                                                             | Jolan     | Therault        | University of British Columbia                                               |
| 1077 | Graduate research<br>assistant in spatial ecology                                    | Ben       | Thesing         | University of Georgia                                                        |
| 1078 | Ecologist                                                                            | Hannah    | Thomas          | Australian Wildlife Conservancy                                              |
| 1079 | MRes                                                                                 | Ollie     | Thomas          | Swansea university                                                           |
| 1080 | Science Policy Fellow                                                                | Pamela    | Thompson        | American Association for the<br>Advancement of Science                       |
| 1081 | Animal Facility Supervisor                                                           | Katherine | Thompson        | Georgia State University                                                     |
| 1082 | Student                                                                              | Jack      | Thompson        | Chelonian Research Institute                                                 |
| 1083 | Professor and Fellow, Royal<br>Society of Canada                                     | James     | Thomson         | University of Toronto                                                        |
| 1084 | Associate Professor                                                                  | Nelson    | Ting            | Univ of Oregon, Institute of<br>Ecology + Evolution, Dept of<br>Anthropology |
| 1085 | Senior research associate                                                            | Tom       | Titus           | University of Oregon                                                         |
| 1086 | Phd student                                                                          | Liliana   | Tlapaya         | CIIDIR                                                                       |
| 1087 | MR                                                                                   | Simon     | Tonge           | Wild Planet Trust                                                            |
| 1088 | External consultant                                                                  | Juan      | Torres          | USFQ                                                                         |
| 1089 | Full Professor                                                                       | Omar      | Torres-Carvajal | Pontificia Universidad Católica<br>del Ecuador                               |
| 1090 | Biological Statistician                                                              | Jeff      | Tracey          | USGS                                                                         |
| 1091 | Wildlife Biologist                                                                   | Diane     | Tracy           | Southern Sierra Research Station                                             |



Científicos preocupados por la protección de Los Cedros

|      |                                                                            |             |                  |                                                                     |
|------|----------------------------------------------------------------------------|-------------|------------------|---------------------------------------------------------------------|
| 1092 | Conservation Biologist                                                     | Scott       | Trageser         | The Biodiversity Group, Creative Conservation Alliance              |
| 1093 | Event Producer                                                             | Kate        | Trail            | Landcare Tasmania                                                   |
| 1094 | Mr.                                                                        | Adrian      | Troya            | Department of Biology, Escuela Politécnica Nacional                 |
| 1095 | Herpetologist Technician                                                   | Zach        | Truelock         | Oklahoma State University                                           |
| 1096 | Agroforestry specialist                                                    | Luisa       | Trujillo         | Cornell University                                                  |
| 1097 | Associate Professor of Biological Anthropology                             | Bethany     | Turner-Livermore | Georgia State University, Atlanta, GA, USA                          |
| 1098 | Msc student                                                                | Miguel      | Ugalde           | Universidade Federal Fluminense                                     |
| 1099 | Environmental scientist                                                    | Angela      | Ugo              | Ashawwa Consults Limited                                            |
| 1100 | Licenciada                                                                 | Janette     | Ulloa            | Corporación ProIdeas                                                |
| 1101 | Professor                                                                  | Nora        | Underwood        | Department of Biological Science, Florida State University          |
| 1102 | Director of AZE and KBAs                                                   | Amy         | Upgren           | American Bird Conservancy                                           |
| 1103 | Assistant Research Professor, School of Life Sciences                      | Nathan      | Upham            | Arizona State University                                            |
| 1104 | PhD student                                                                | Rafael      | Urbina Casanova  | Chicago Botanic Garden and Northwestern University                  |
| 1105 | Field Biologist, Conservation Assistant                                    | Lila        | Uzzell           | Atlanta Botanical Garden                                            |
| 1106 | Reserva Los Cedros                                                         | Angelica    | Vaca             | Universidad Tecnológica Indoamerica                                 |
| 1107 | Director Ejecutivo (e)                                                     | Juan Carlos | Valarezo         | Fundación Aves y Conservación                                       |
| 1108 | Academic Director, Kenya Study Abroad Program                              | Ryan        | Valdez           | George Mason University                                             |
| 1109 | Lbe                                                                        | Nathalia    | Valencia         | USFQ                                                                |
| 1110 | Conservation Officer                                                       | Lina        | Valencia         | Global Wildlife Organization                                        |
| 1111 | BSc Biology, PUCE; MPhil Environment and Development, Cambridge University | Andrés      | Vallejo          | Ecuador Terra Incognita magazine                                    |
| 1112 | Volunteer                                                                  | Giselle     | Van Bergen       | The rattlesnake conservancy                                         |
| 1113 | Board Member                                                               | Chera       | Van Burg         | Species Alliance                                                    |
| 1114 | Senior director, wildlife trade                                            | Peter Paul  | Van Dijk         | Global Wildlife Conservation                                        |
| 1115 | Associate professor                                                        | Barbara     | Van Dyck         | Centre of Agroecology, Water and Resilience, Coventry University UK |
| 1116 | Amphibian Technician                                                       | Nick        | Van Gilder       | CDFW                                                                |
| 1117 | M.Sc.                                                                      | Bs          | Van Helvoort     | WUR                                                                 |
| 1118 | Mycologist                                                                 | Sue         | Van Hook         | Retired                                                             |
| 1119 | Manager: Soutpansberg Protected Area, Limpopo, South Africa                | Oldrich     | Van Schalkwyk    | Endangered Wildlife Trust                                           |
| 1120 | Postdoc                                                                    | Roo         | Vandegrift       | University of Oregon                                                |

Científicos preocupados por la protección de Los Cedros

|      |                                                                       |                 |                  |                                                                           |
|------|-----------------------------------------------------------------------|-----------------|------------------|---------------------------------------------------------------------------|
| 1121 | Professor Emeritus                                                    | Stefano         | Varese           | University of California, Davis                                           |
| 1122 | Biólogo                                                               | Víctor          | Vargas García    | ASG Perú                                                                  |
| 1123 | Associate Professor of Sustainability                                 | Ashwani         | Vasishth         | Ramapo College of New Jersey                                              |
| 1124 | Educator                                                              | Traci           | Veenstra         | WCPSS                                                                     |
| 1125 | Examiner                                                              | Johan           | Veenstra         | NCDHHS                                                                    |
| 1126 | Biologist                                                             | Andrea          | Vega             | USFQ                                                                      |
| 1127 | Ecologist                                                             | Sabrina         | Velasco          | University of Sydney                                                      |
| 1128 | PhD Candidate Transport Systems                                       | Alexandra       | Velasco          | Technische Universität Dresden                                            |
| 1129 | Biology undergrad student                                             | Francisco       | Velasquez        | USFQ                                                                      |
| 1130 | PhD student                                                           | Susana          | Velásquez-Franco | University of Utah                                                        |
| 1131 | Postdoctoral Researcher                                               | Ruben           | Venegas          | The University of Queensland                                              |
| 1132 | Marie Venner                                                          | Marie           | Venner           | National Academy of Sciences<br>TRB researcher and Principal Investigator |
| 1133 | Dr.                                                                   | Sheila          | Vergara          | University of the Philippines                                             |
| 1134 | Science Teacher                                                       | Katie           | Vernon           | The Lovett School                                                         |
| 1135 | General curator                                                       | Carlos          | Vicente Buitrago | Acuario de Zaragoza                                                       |
| 1136 | Emeritus Professor                                                    | Peter           | Victor           | Yor University                                                            |
| 1137 | MA, PHD                                                               | Maria           | Victor           | (retired adjunct) University of Toronto                                   |
| 1138 | Research Technician                                                   | Juliana         | Vidal            | University of Illinois Urbana Champaign                                   |
| 1139 | Director General                                                      | Jean-Christophe | Vié              | Fondation Franklinia                                                      |
| 1140 | Physician, conservation researcher, wildlife rehabilitation volunteer | Brandon         | Vieder           | Michigan State University                                                 |
| 1141 | Katharine Vila, PhD                                                   | Kathy           | Vila             | Katharine Vila PhD                                                        |
| 1142 | Director                                                              | Juan            | Villalba-Macías  | Bioparque M'Bopicuá, URUGUAY.                                             |
| 1143 | Research Assistant                                                    | Edgar           | Villamarin       | University of Nevada, Reno                                                |
| 1144 | Citizen Scientist                                                     | Areli           | Villavicencio    | iNaturalist                                                               |
| 1145 | Dr                                                                    | Alejandro       | Villegas         | UNAM                                                                      |
| 1146 | Ecologist                                                             | Jasmine         | Vink             | Green tape solutions                                                      |
| 1147 | Phd student                                                           | Francesca       | Vitali           | University of Milan                                                       |
| 1148 | Ecologist                                                             | María José      | Viteri Campuzano | Ecology project international                                             |
| 1149 | licenciado en biología                                                | Ilad            | Vivas            | IVIC                                                                      |
| 1150 | Research Plant Pathologist (Retired)                                  | Detlev          | Vogler           | Institute of Forest Genetics, USDA, Forest Service, Placerville, CA, USA  |
| 1151 | Dr. / Curator Research & Conservation                                 | Lorenzo         | Von Fersen       | Zoo Nuremberg                                                             |
| 1152 | Field Ecologist                                                       | Tristan         | Vratil           | Virginia Tech University                                                  |
| 1153 | Retired                                                               | Raju            | Vyas             | Sayaji Baug Zoo, Vadodara, Gujarat, India                                 |
| 1154 | Researcher                                                            | Bryce           | Wade             | ORNL                                                                      |
| 1155 | Dr.                                                                   | Ronald          | Wagner           | Biotecon Diagnostics                                                      |

Científicos preocupados por la protección de Los Cedros

|      |                                                          |           |            |                                                             |
|------|----------------------------------------------------------|-----------|------------|-------------------------------------------------------------|
| 1156 | Ceo                                                      | Jonas     | Wahlström  | Skansen-akvariet                                            |
| 1157 | Interpretation Coordinator                               | Abbie     | Wakelin    | Auckland Zoo                                                |
| 1158 | Professor of Biology                                     | Thomas    | Walla      | Colorado Mesa University                                    |
| 1159 | Director of International Programs and Partnerships      | George    | Wallace    | American Bird Conservancy                                   |
| 1160 | Classroom tutor                                          | David     | Walstrom   | Marfa Elementary School                                     |
| 1161 | Dr.                                                      | Silu      | Wang       | University of California, Berkeley                          |
| 1162 | Mr.                                                      | Sangay    | Wangchuk   | Royal Botanical Park                                        |
| 1163 | Herpetological Technician                                | Trina     | Wantman    | Unity College                                               |
| 1164 | conservation photographer                                | Irene     | Waring     | iNaturalist                                                 |
| 1165 | Professor of Biology (Emeritus)                          | Nickolas  | Waser      | University of California Riverside                          |
| 1166 | Director                                                 | Hirofumi  | Watabe     | Tama zoological park                                        |
| 1167 | Professor                                                | James     | Watson     | University of Queensland                                    |
| 1168 | Mr.                                                      | Will      | Watson     | Chartered Institute of Ecology and Environmental Management |
| 1169 | Executive VP of Wellness and Animal Behavior             | Jason     | Watters    | San Francisco Zoological Society                            |
| 1170 | Founder and CEO                                          | James     | Watuwa     | Elgon Wildlife Conservation Organization                    |
| 1171 | Citizen Scientist                                        | David     | Weaver     | Inaturalist                                                 |
| 1172 | BSc. Biology, MSc. Environmental Sciences, PhD Geography | Jena      | Webb       | UQAM                                                        |
| 1173 | honorary lecturer                                        | Andreas   | Weber      | Berlin University of the Arts                               |
| 1174 | Professor                                                | Elisabeth | Weber      | University of California, Santa Barbara                     |
| 1175 | Msv                                                      | Holger    | Weckmüller | Universitat autonoma de barcelona                           |
| 1176 | MSc                                                      | Franziska | Weineiss   | Private protector                                           |
| 1177 | Fellow                                                   | Ben       | Weinstein  | University of Florida                                       |
| 1178 | Student Researcher                                       | Marley    | Weiss      | University of Puget Sound                                   |
| 1179 | Graduate Student                                         | Matthew   | Welc       | Auburn University                                           |
| 1180 | Plant Documentation Manager                              | Michael   | Wenzel     | Atlanta Botanical Garden                                    |
| 1181 | Wildlife Ecologist                                       | Jeffery   | Werner     | BC Government                                               |
| 1182 | director                                                 | James     | West       | reserva rio guaycuyacu                                      |
| 1183 | Director of Global Tree Conservation                     | Murphy    | Westwood   | The Morton Arboretum                                        |
| 1184 | Student                                                  | Sara      | Westwood   | Clemson University                                          |
| 1185 | Research Assistant Professor                             | Peter     | Wetherwax  | Department of Biology, University of Oregon, USA            |
| 1186 | Extension Agent                                          | Patricia  | Whitener   | Clemson University                                          |
| 1187 | Professor, FRSC                                          | Michael   | Whitlock   | Zoology, University of British Columbia                     |
| 1188 | Professor of Biology                                     | Kenneth   | Whitney    | University of New Mexico                                    |

Científicos preocupados por la protección de Los Cedros

|      |                                                                |            |                 |                                                   |
|------|----------------------------------------------------------------|------------|-----------------|---------------------------------------------------|
| 1189 | CEO and Senior Scientist                                       | Edith      | Widder          | .Ocean Research & Conservation Association        |
| 1190 | Director                                                       | Charles    | Wikenhauser     | Milwaukee County Zoo                              |
| 1191 | Professor of Ecology, Evolutionary Biology, and Public Affairs | David      | Wilcove         | Princeton University                              |
| 1192 | Research assistant                                             | Madelon    | Willemsen       | University on Sydney                              |
| 1193 | Professor                                                      | Yvonne     | Willi           | University of Basel                               |
| 1194 | Executive Director                                             | Kai        | Williams        | The International Wildlife Rehabilitation Council |
| 1195 | Conservation, Research & Sustainability Coord                  | Kari       | Williams        | Milwaukee County Zoo                              |
| 1196 | Postdoctoral Scientist                                         | Sean       | Williamson      | Monash University                                 |
| 1197 | Professor                                                      | Edward O.  | Wilson          | Harvard Museum of Comparative Zoology             |
| 1198 | Associate Professor                                            | Mark       | Wilson          | Colorado College                                  |
| 1199 | Postdoctoral researcher                                        | Sarah Jane | Wilson          | University of Victoria, BC, Canada                |
| 1200 | Principal Consultant                                           | David      | Wilson          | The Biodiversity Consultancy                      |
| 1201 | Principal Consultant                                           | David      | Wilson          | The Biodiversity Consultancy                      |
| 1202 | Ms                                                             | Mikaylie   | Wilson          | Auckland Zoo                                      |
| 1203 | Dr                                                             | Jane       | Wilson          | Univwrsity of Cambridge                           |
| 1204 | Independent researcher                                         | Daniel     | Winkler         | Mushrooming                                       |
| 1205 | Conservation planner                                           | Audrey     | Winters         | US DOI                                            |
| 1206 | Lydia Wong                                                     | Lydia      | Wong            | University of Ottawa (Canada)                     |
| 1207 | Senior Project Officer                                         | Michelle   | Wong            | Kadoorie Farm and Botanic Garden                  |
| 1208 | Professor                                                      | Michelle   | Wood            | University of Oregon                              |
| 1209 | PhD Student                                                    | Chris      | Woodham         | University of Oxford                              |
| 1210 | Vice Chair for Science and Biodiversity                        | Stephen    | Woodley         | World Commission on Protected Areas, IUCN         |
| 1211 | Phd Candidate                                                  | Samantha   | Worthy          | University of Maryland                            |
| 1212 | Senior manager of educational collaborations                   | Kari       | Wouk            | NC museum of natural sciences                     |
| 1213 | Ms                                                             | Sally      | Wren            | IUCN SSC Amphibian Specialist Group               |
| 1214 | PhD                                                            | Jared      | Wright          | Purdue University                                 |
| 1215 | A protector                                                    | Judith     | Wuestner        | Private                                           |
| 1216 | Chair of the Paraguayan IUCN Committee                         | Alberto    | Yanosky         | IUCN Committee Paraguay                           |
| 1217 | Aquarist                                                       | Borja      | Yebra Verdes    | Acuario Fluvial de Zaragoza                       |
| 1218 | Senior Lecturer                                                | Pichamon   | Yeophantong     | University of New South Wales (Canberra)          |
| 1219 | Postdoc                                                        | Yoonjung   | Yi              | Nanjing Forestry University                       |
| 1220 | Professor Emeritus                                             | Marcus     | Young Owl       | CSULB                                             |
| 1221 | PhD Student                                                    | Victor     | Yunes Guimarães | Universidade Estadual Paulista - Unesp            |
| 1222 | Senior Naturalist                                              | Jake       | Zadik           | Brays Island                                      |

Científicos preocupados por la protección de Los Cedros

|      |                               |               |               |                                                |
|------|-------------------------------|---------------|---------------|------------------------------------------------|
| 1223 | Conservation officer          | Habibun Najar | Zainal Abidin | Malaysian Nature Society                       |
| 1224 | Bachelor in Biology           | Andrea        | Zamorano      | PUCE                                           |
| 1225 | Biologist                     | Nicolás       | Zapata        | Pontificia Universidad Católica del Ecuador    |
| 1226 | Environmental Quality Manager | Ceyda         | Zazoglu       | Turkish Airlines                               |
| 1227 | Executive Director            | Lindsey       | Zehel         | Defend Them All foundation                     |
| 1228 | Ecologist                     | Kristen       | Zemaitis      | University of Georgia                          |
| 1229 | Programme manager             | Zijie         | Zhang         | Daji Nature                                    |
| 1230 | Dr                            | Kat           | Zieminska     | Uppsala U                                      |
| 1231 | Director Kayapo Project       | Barbara       | Zimmerman     | International Conservation Fund of Canada,     |
| 1232 | Ecological economist          | Sophus        | Zu Ermgassen  | Durrell Institute for Conservation and Ecology |
| 1233 | Conservation Manager          | Nicolas       | Zuel          | Ebony Forest                                   |

## Bibliografía de la carta

- 1 Myers, N., Mittermeier, R. A., Mittermeier, C. G., da Fonseca, G. A. B. & Kent, J. Biodiversity hotspots for conservation priorities. *Nature* **403**, 853-858 (2000).
- 2 Bech, J. *et al.* Arsenic and heavy metal contamination of soil and vegetation around a copper mine in Northern Peru. *Sci. Total Environ.* **203**, 83-91, doi:10.1016/s0048-9697(97)00136-8 (1997).
- 3 Bianchini, F. *et al.* Elemental contamination of an open-pit mining area in the Peruvian Andes. *International Journal of Environmental Science and Technology* **12**, 1065-1074, doi:10.1007/s13762-013-0493-8 (2015).
- 4 Bundschuh, J. *et al.* One century of arsenic exposure in Latin America: A review of history and occurrence from 14 countries. *Sci. Total Environ.* **429**, 2-35, doi:10.1016/j.scitotenv.2011.06.024 (2012).
- 5 Grandjean, P., White, R. F., Nielsen, A., Cleary, D. & Santos, E. C. D. Methylmercury neurotoxicity in Amazonian children downstream from gold mining. *Environmental Health Perspectives* **107**, 587-591, doi:10.2307/3434402 (1999).
- 6 Li, Z., Ma, Z., van der Kuip, T. J., Yuan, Z. & Huang, L. A review of soil heavy metal pollution from mines in China: Pollution and health risk assessment. *Sci. Total Environ.* **468**, 843-853, doi:10.1016/j.scitotenv.2013.08.090 (2014).
- 7 Oyarzun, J. *et al.* Abandoned tailings deposits, acid drainage and alluvial sediments geochemistry, in the arid Elqui River Basin, North-Central Chile. *Journal of Geochemical Exploration* **115**, 47-58, doi:10.1016/j.gexplo.2012.02.008 (2012).
- 8 Strosnider, W. H. J., Llanos Lopez, F. S. & Nairn, R. W. Acid mine drainage at Cerro Rico de Potosi II: severe degradation of the Upper Rio Pilcomayo watershed. *Environmental Earth Sciences* **64**, 911-923, doi:10.1007/s12665-010-0899-2 (2011).
- 9 Vezzoli, G. *et al.* Quantifying modern erosion rates and river-sediment contamination in the Bolivian Andes. *Journal of South American Earth Sciences* **45**, 42-55, doi:10.1016/j.jsames.2013.02.001 (2013).
- 10 Peck, M. *et al.* Focusing conservation efforts for the critically endangered brown-headed spider monkey (*Ateles fusciceps*) using remote sensing, modeling, and playback survey methods. *Int J Primatol* **32**, 134-148 (2010).
- 11 Peck, M., Tirira, D. & Mariscal, A. Developing a sustainable network for primates in Ecuador (PRIMENET). Final Report project number 14-040., (Darwin Initiative, 2008).
- 12 BirdLife International. (BirdLife International, Cambridge, United Kingdom, 2017).
- 13 Albuja V., L. *et al.* *Fauna de vertebrados del Ecuador*. (Escuela Politécnica Nacional Instituto de Ciencias Biológicas, 2012).
- 14 Roy, B. A. *et al.* New mining concessions could severely decrease biodiversity and ecosystem services in Ecuador. *Tropical Conservation Science* **11**, 1-20 (2018).  
<https://journals.sagepub.com/doi/full/10.1177/1940082918780427>.
- 15 Seed, J. 2020. *Wildlife documentary about Los Cedros*,  
<https://www.youtube.com/watch?v=1m5Wq2Uv204&feature=youtu.be>
- 16 Reserva Los Cedros. Website: [loscedrosreserve.org](http://loscedrosreserve.org)

**Acción de Protección Constitucional N° 10332-2018-00640:** Con respecto a la garantía de las disposiciones de la Constitución de Ecuador de los Derechos de la Naturaleza en relación con la reserva forestal protegida, Bosque Protector "Reserva Los Cedros".

**El mono araña de cabeza café: "Embajador" de la naturaleza.**

**Resumen:** El mono araña de cabeza café (nombre científico: *Ateles fusciceps*) es una especie en peligro crítico (UICN, 2020) endémica de Ecuador y representada dentro del Bosque Protector Reserva Los Cedros. En términos biológicos, es una especie "paraguas", un "indicador" y un "ingeniero de ecosistemas" (definido a continuación) asociado con la "Naturaleza" en un alto estado de conservación y "valor". ***En el caso de esta apelación legal, también es una especie "Embajadora" que representa a la "Naturaleza", cuyos derechos deben estar protegidos por la Constitución (Derechos de la Naturaleza, Artículos 10, párrafo 2 de la Constitución, arts. 71 y 72).***

**Contexto:** El mono araña de cabeza café, localizado en el noroccidente del Ecuador, ha perdido más del 80% de su área original de distribución. En 2005, se estimó que quedaban menos de 250 monos araña de cabeza café en todo el mundo, lo que le otorgó un lugar entre los 25 primates más amenazados a nivel global (Schwitzer et al., 2017). Tanto en la Unión Internacional para la Conservación de la Naturaleza (UICN, 2020) como en la Lista Roja del Ecuador (Tirira, 2011) está clasificada bajo la categoría En Peligro Crítico de Extinción, por lo que es una especie de máxima prioridad para la acción de conservación contra las amenazas actuales que incluyen la tala ilegal, comercio ilegal de vida silvestre, cacería, cambio climático y minería (Morelos-Juárez et al., 2018).

En respuesta a estas amenazas, se inició el proyecto PRIMENET (Peck et al. 2008). El proyecto, fundado en la Reserva Los Cedros (y apoyado por el gobierno del Reino Unido), involucró a investigadores y comunidades ecuatorianas para determinar el estado de las poblaciones de este primate, su hábitat y garantizar su supervivencia. El proyecto ha capacitado a más de 80 'parabiólogos' de nivel comunitario y científicos ciudadanos de comunidades indígenas y forestales y ha educado a la próxima generación de académicos latinoamericanos (BSc / MSc / PhD) en biología de conservación de primates (ver sus informes y documentos científicos; Calle- Rendón et al., 2016; Estévez-Noboa et al., 2008; Gavilánez-Endara et al., 2006; Morelos Juarez et al., 2018; Shanee et al., 2006).

La Reserva Los Cedros ha sido un socio principal debido a la presencia del mono araña de cabeza café dentro de sus límites y fue seleccionado para organizar el primer curso de capacitación de "parabiólogos" o asistentes locales de investigación. Nuestro equipo

posteriormente estimó densidades de 1.16 individuos / km<sup>2</sup> dentro de sus 68km<sup>2</sup> (Gavilánez-Endara et al., 2006). Informes recientes indican que este número ha aumentado a medida que se tala el bosque que se encuentra alrededor de la reserva. El proyecto PRIMENET ha construido las bases para una red de primatólogos ecuatorianos y un legado de éxito que incluye el establecimiento de la Reserva Tesoro Escondido (<https://tesororeserve.org>). Este es un legado ganado con esfuerzo y que debe protegerse para las generaciones futuras.

El mono araña de cabeza café es una "**especie paraguas**" que requiere de grandes áreas de bosque intacto para sobrevivir. Esto se debe a su ecología, ya que más del 80% de su dieta se basa en la fruta, que sólo está disponible en grandes áreas de bosque primario y continuo (Peck et al., 2011). La protección de esta especie paraguas en la Reserva Los Cedros significa que otras 215 especies en peligro de extinción (Roy et al.2018; <https://loscedrosreserve.org/los-cedros-reserve-species-lists/>) también están protegidas y contribuyen a las obligaciones contenidas en el Art. 8 (f) del Convenio de las Naciones Unidas sobre Diversidad Biológica de 1992 y el objetivo 12 de biodiversidad de Aichi (CDB) en relación con las especies amenazadas.

También es una "**especie indicadora**". Las especies indicadoras solo están presentes en hábitats de alta calidad biológica. Como la especie de primates más grande que habita en el dosel en el noroeste del Ecuador, el mono araña de cabeza café a menudo es la primera víctima de la cacería, la pérdida del bosque, la fragmentación y la degradación del bosque (Morelos-Juárez et al., 2018) y su ausencia en el bosque sugiere la degradación de la 'Naturaleza'. La presencia de esta especie indicadora dentro de la Reserva Los Cedros muestra la alta calidad del hábitat natural, o "Naturaleza", y su conservación efectiva.

La protección de la "Naturaleza" dentro de la Reserva Los Cedros nos protege en última instancia a través de la provisión de servicios ecosistémicos y oportunidades para medios de vida sostenibles. En este contexto, la importancia del mono araña de cabeza café, en representación de la "Naturaleza" va más allá de su papel como indicador y especie paraguas. También brinda oportunidades económicas directamente a través del ecoturismo y el manejo forestal sostenible.

El mono araña de cabeza café es un "**ingeniero de ecosistemas**". Mantiene la diversidad de árboles que conforma el bosque al jugar un papel importante en la dispersión de semillas. Nuestros análisis actuales de la diversidad de árboles en la Reserva Los Cedros han identificado 336 especies de árboles, y predecimos más de 500 especies de árboles dentro de la reserva, convirtiéndolo en uno de los sitios con mayor biodiversidad a nivel mundial. El papel de los dispersores de semillas, como el mono araña de cabeza café, es fundamental para mantener esta diversidad de árboles. Nuestra investigación ya ha demostrado que, en los bosques donde se ha extirpado el mono araña de cabeza café, las especies de árboles de madera dura, buscadas para la construcción y por los madereros, ya no se regeneran ya que sus semillas más grandes no pueden dispersarse sin este ingeniero vital del ecosistema (Calle- Rendón et al., 2016; Morelos-Juárez et al. 2015).

La presencia de este amenazado primate en un ecosistema forestal es vital para mantener la estructura del bosque con el fin de optimizar el secuestro de carbono, el control del clima local y para estrategias de extracción sostenibles y medios de vida rurales (Morelos-Juárez et al., 2015). Estos servicios vitales del ecosistema, proporcionados por la Naturaleza para garantizar la supervivencia de nuestra propia especie, consagrados en los Objetivos de Desarrollo Sostenible de las Naciones Unidas (ODS 6 Agua limpia y saneamiento, ODS 13 Acción climática; ODS 15 Vida en la tierra) y el objetivo 15 de biodiversidad CBD Aichi (reservas de carbono), necesitan urgentemente protección.



## Una especie embajadora de la "Naturaleza"

Ecuador es un líder mundial en la incorporación de los "Derechos de la Naturaleza" dentro de su constitución. La "Naturaleza", en su encarnación más alta, está representada efectivamente por ecosistemas hiper-diversos incorporados actualmente dentro de los Bosques Protectores, como Los Cedros y territorios indígenas, y representados por la presencia de "**especies embajadoras**" en peligro de extinción, como el mono araña con cabeza café. Estos son los "Derechos de la Naturaleza" que están actualmente amenazados y que la Constitución debe proteger.

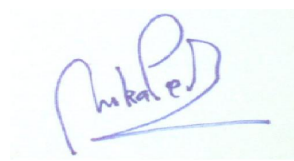

Dr Mika Peck, Senior Lecturer in Biology, JMS5D24  
School of Life Sciences, University of Sussex  
Brighton BN19QJ, United Kingdom  
E: [m.r.peck@sussex.ac.uk](mailto:m.r.peck@sussex.ac.uk)  
T: +44 (0)1273 877332  
M: +44 (0)7964187013

## REFERENCES

- Calle-Rendón, B. R., M. R. Peck, S. E. Bennett, C. Morelos-Juárez y F. Alfonso-Cortes. 2016. Comparison of forest regeneration in two sites with different primate abundances in Northwestern Ecuador. *International Journal of Tropical Biology and Conservation* 64 (2): 493–506. <https://revistas.ucr.ac.cr/index.php/rbt/article/view/18415>
- Estévez-Noboa, M. I. 2008. Densidad poblacional y uso de hábitat de tres especies de primates en el Bosque Protector Los Cedros, provincia de Imbabura. En: *Memorias, XXXII Jornadas Nacionales de Biología*. Universidad Técnica Particular de Loja. Loja
- Estévez-Noboa, M. I., M. M. Gaviláñez-Endara y D. G. Tirira. 2008. Notas sobre la dieta de tres especies de primates en el Bosque Protector Los Cedros, provincia de Imbabura. En: *Memorias, XX*
- Gaviláñez-Endara, M. M. 2006. Demografía, actividad y preferencia de hábitat de tres especies de primates (*Alouatta palliata*, *Ateles fusciceps* y *Cebus capucinus*) en un bosque nublado del noroccidente ecuatoriano. Tesis de licenciatura, Pontificia Universidad Católica del Ecuador. Quito
- Morelos Juarez, Citlalli, Moscoso, Paola, Alfonso-Cortes, Felipe, Cervera, Laura, de la Torre, Stella, Estévez-Noboa, María Isabel, Fuentes, Nathalia, Peck, Mika, Tapia, Andrea and Tirira, Diego G (2018) *Mono araña de cabeza marrón (Ateles fusciceps)*. In: Tirira, Diego G, de la Torre, Stella and Zapata Ríos, Galo (eds.) *Estado de conservación de los primates del Ecuador*. Publicación especial sobre los mamíferos del Ecuador (12). Grupo de Estudio de Primates del Ecuador / Asociación Ecuatoriana de Mastozoología, Quito, Ecuador, pp. 172-

183. ISBN 978-9942-8584-2-9

[www.researchgate.net/publication/330533190\\_Estado\\_de\\_Conseervacion\\_de\\_los\\_Primates\\_de\\_l\\_Ecuador](http://www.researchgate.net/publication/330533190_Estado_de_Conseervacion_de_los_Primates_de_l_Ecuador)

Morelos-Juárez, C., Tapia, A., Conde G., Peck M. (2015). Diet of the critically endangered brown-headed spider monkey (*Ateles fusciceps fusciceps*) in the Ecuadorian Chocó: Conflict between primates and loggers over fruiting tree species. <https://peerj.com/preprints/1574.pdf>

Peck, M. R., D. G. Tirira, A. Mariscal y K. Paredes. 2008. Developing a sustainable network for primates in Ecuador (PRIMENET). Informe final. Darwin Initiative. Quito y Brighton, RU. <https://www.darwininitiative.org.uk/project/14040/>

Peck, M. R., J. Thorne, A. Mariscal, A. Baird, D. G. Tirira y D. Kniveton. 2011. Focusing conservation efforts for the Critically Endangered Brown-headed Spider Monkey (*Ateles fusciceps*) using remote sensing, modeling, and playback survey methods. International Journal of Primatology 32: 134–148. <https://link.springer.com/article/10.1007/s10764-010-9445-z>

Roy A.B., Martin Zorrilla, M., Endara L., Thomas D.C., Vandegrift R., J.M. Rubenstein, Policha, T.,

Ríos-Touma B., y Morley Read, M. (2018). New Mining Concessions Could Severely Decrease Biodiversity and Ecosystem Services in Ecuador. Tropical Conservation Science Voume 11: 1–20. DOI: 10.1177/1940082918780427

Shanee, S. 2006. Population reinforcement feasibility study for the Brown-headed Spider Monkey (*Ateles geoffroyi fusciceps*) at the Los Cedros Reserve, Ecuador. Tesis de maestría, University of Oxford-Brookes. Oxford, RU

Schwitzer, C., Mittermeier, R. A., Rylands, A. B., Chiozza, F., Williamson, E. A., Macfie, E. J., et al. (2017). Primates in Peril: The World's 25 Most Endangered Primates 2016–2018. Primate Conservation (Vol. 22). Arlington, VA: IUCN SSC Primate Specialist Group, International Primatological Society, Conservation International y Bristol Zoological Society. <https://doi.org/10.1896/052.022.0101>

Tirira, D. G. (2011). Libro Rojo de los mamíferos del Ecuador (2a.). Quito: Fundación Mamíferos y Conservación, Pontificia Universidad Católica del Ecuador y Ministerio del Ambiente del Ecuador. Publicación Especial sobre los mamíferos del Ecuador 8.

UICN. (2020). The IUCN Red List of Threatened Species. The IUCN Red List of Threatened Species. <www.redlist.org>. Accessed 11 June 2020

## Introducción

El Convenio de Diversidad Biológica, suscrito por Ecuador en 1993, reconoció la necesidad de conservar "...áreas de particular importancia para la biodiversidad..." en la Meta 11 de Aichi. En el Congreso Mundial de la Naturaleza (CMN) celebrado en Bangkok en 2004, los miembros de la UICN reconocieron la necesidad de un marco unificador para identificar los sitios importantes de toda la biodiversidad, específicamente, la Resolución 3.013 del CMN solicitó: "*un proceso consultivo mundial para acordar una metodología que permita a los países identificar las Áreas Clave para la Biodiversidad, basándose en los datos de la Lista Roja de Especies Amenazadas de la UICN y otros conjuntos de datos, y aprovechando los enfoques existentes*".

En el Congreso Mundial de la Naturaleza de Hawái en 2016, el Consejo de la UICN aprobó oficialmente Un Estándar Global para la Identificación de Áreas Clave para la Biodiversidad, un estándar que agrupa a las organizaciones de conservación entorno a un enfoque común para identificar los sitios que contribuyen significativamente a la persistencia mundial de la biodiversidad. También en 2016, con el propósito de identificar, mapear, monitorear y conservar las KBA en todo el mundo, las principales organizaciones mundiales de conservación de la naturaleza lanzaron la [Alianza de las KBA](#), en la actualidad conformada por 13 organizaciones: BirdLife International, IUCN, American Bird Conservancy, Amphibian Survival Alliance, Conservation International, Critical Ecosystem Partnership Fund, Global Environmental Facility, Global Wildlife Conservation, NatureServe, Rainforest Trust, Royal Society for the Protection of Birds, Wildlife Conservation Society y World Wildlife Fund.

Las Áreas Clave para la Biodiversidad, o KBA, proporcionan un marco general diseñado para armonizar los enfoques existentes para la identificación de sitios importantes para la biodiversidad, y son definidas como: "*sitios que contribuyen significativamente a la persistencia global de la biodiversidad*". Las KBA se identifican utilizando criterios diseñados para capturar elementos de la biodiversidad a través de niveles genéticos, de especies y ecosistemas.

Entre otros, gracias a su diseño, las KBA apoyan a los gobiernos en el establecimiento de prioridades de conservación, la expansión estratégica de las redes de áreas protegidas y la aplicación de los acuerdos ambientales internacionales, entre otros, los compromisos del Convenio de Diversidad Biológica en sus metas de Aichi 11 (ampliar la cobertura de las áreas protegidas) y 12 (prevenir la extinción de especies).

El Código Orgánico del Ambiente reconoce en el artículo 36 a las áreas especiales para la conservación de la biodiversidad como uno de los mecanismos existentes en el país para la conservación in-situ, y en el artículo 58 se mencionan a las áreas reconocidas por instrumentos internacionales como áreas especiales para la conservación de la biodiversidad, entre ellas, las áreas especiales de importancia para la conservación de humedales, de las aves, del patrimonio mundial, cultural y natural, entre otras.

El Acuerdo Ministerial 001 del 01 de marzo de 2005 reconoce a las IBAs como áreas de interés público para la conservación de especies de aves.

## Reserva Los Cedros como KBA

Los criterios de las KBA permiten captar las diversas formas en las cuales un sitio es importante para la persistencia mundial de la diversidad biológica, porque posee una diversidad biológica amenazada, geográficamente restringida, tiene una integridad ecológica sobresaliente, mantiene procesos biológicos, o se demuestra que es altamente irremplazable mediante un análisis cuantitativo. Si bien la actualización de estos criterios requiere de un proceso participativo el sometimiento formal de la propuesta, es posible realizar un análisis preliminar e identificar cuáles de estas especies seguramente cumplirán con los criterios del Estándar KBA de 2016.

Los Cedros fue declarado Área de Importancia para la Conservación de las Aves y la Biodiversidad (IBA) por BirdLife International en 2005 y Área Clave para la Biodiversidad (KBA) en 2015, en base a la presencia de poblaciones de especies de aves tanto amenazadas como de área de distribución.

restringida. Sin embargo, con una lista de especies de cerca de 1300 especies entre mamíferos, aves, reptiles, anfibios, insectos y plantas, entre ellas al menos 54 especies amenazadas de extinción a nivel global y más de 140 especies con áreas de distribución restringidas, la importancia de Los Cedros para la persistencia mundial de la biodiversidad se extiende notablemente a varios de estos taxones.

En concreto, con base en un análisis preliminar de la actual lista de especies disponible, 18 especies de anfibios y plantas -entre ellas 11 especies de orquídeas sólo conocidas de esta reserva-, tienen el potencial de cumplir con los criterios A (biodiversidad amenazada a nivel mundial) y B (biodiversidad restringida geográficamente) del Estándar de KBA.

Los sitios que cumplen con el criterio A son importantes a nivel mundial, dado que albergan una proporción significativa de la población global de una especie en peligro de extinción. La desaparición o afectación de estos sitios, por lo tanto, aumentarían notablemente el riesgo de extinción de las especies amenazadas que habitan en ellos. En el caso de los Cedros, cabe destacar especies como el Cutín Mutable, con la mayor parte del área de su distribución conocida restringida a esta reserva.

Los sitios que cumplen con el Criterio B albergan una proporción significativa de la población mundial de especies con áreas de distribución restringidas geográficamente. Por definición, hay pocos sitios en los que existe una biodiversidad geográficamente restringida y, por lo tanto, existen pocos lugares para salvaguardar la biodiversidad que se encuentra en cada uno de estos sitios, por lo que su afectación podría agravar notablemente el estado de amenaza de estas especies. Los Cedros cuenta con una elevada cantidad de especies de distribución restringida, entre ellas varias especies de anfibios y orquídeas conocidas únicamente en esta reserva o localidades aledañas.

Es importante resaltar que varias especies endémicas o casi endémicas a la reserva no han sido aún evaluadas a nivel mundial, por lo que el número de especies potencialmente calificadoras de los criterios de KBA y la importancia del sitio de cara al mantenimiento de poblaciones significativas a nivel mundial de especies amenazadas y de distribución restringida es mayor al presentado en este análisis poblacional.

Atte,

David F. Díaz Fernández  
KBA co-Regional Focal Point for Latin America and Caribbean / Co-Punto Focal Regional de las KBA para América Latina y el Caribe  
c/o Jocotoco, Lizardo García E9-104 y Andrés Xaura, Quito, Ecuador  
e-mail: DDiaz@keybiodiversityareas.org  
Skype: david.f.diaz.fernandez  
@DavidKBA

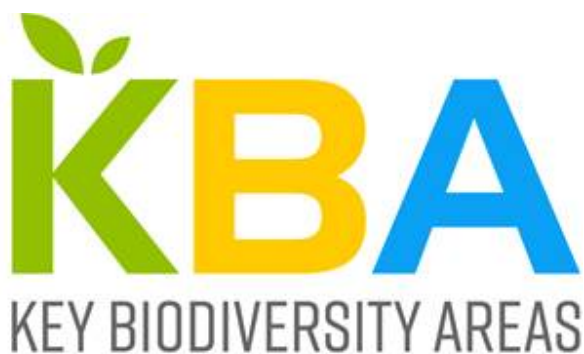

**TITULO II DE LA CONSERVACION IN SITU**  
**CAPITULO I DE LA CONSERVACIÓN IN SITU Y SUS INSTRUMENTOS**

**Art. 36.-** De los mecanismos para la conservación in situ. Los mecanismos para la conservación in situ de la biodiversidad son los siguientes:

1. El Sistema Nacional de Áreas Protegidas;
2. **Las áreas especiales para la conservación de la biodiversidad;**
3. La gestión de los paisajes naturales; y,
4. Otras que determine la Autoridad Ambiental Nacional

**CAPITULO III ÁREAS ESPECIALES PARA LA CONSERVACION DE LA BIODIVERSIDAD**

**Art. 55.-** De las áreas especiales para la conservación de la biodiversidad. Se podrán incorporar áreas especiales para la conservación de la biodiversidad complementarias al Sistema Nacional de Areas Protegidas con el fin de asegurar la integridad de los ecosistemas, la funcionalidad de los paisajes, la sostenibilidad de las dinámicas del desarrollo territorial, el aprovechamiento sostenible de los recursos naturales o la recuperación de las áreas que han sido degradadas o se encuentran en proceso de degradación, de acuerdo a los criterios que determine la Autoridad Ambiental Nacional. La creación de estas áreas especiales podrá ser impulsada por iniciativa pública, privada o comunitaria y deberá ser registrada tanto en los sistemas de información de los Gobiernos Autónomos Descentralizados como en el Sistema Único de Información Ambiental.

Cuando un área especial para la conservación de la biodiversidad haya sido establecida con anterioridad a un área protegida, prevalecerán las reglas para las áreas protegidas.

**Art. 56.-** De los tipos de áreas especiales para la conservación de la biodiversidad. Las áreas especiales para la conservación de la biodiversidad son las siguientes:

1. **Áreas o sitios reconocidos por instrumentos internacionales ratificados por el Estado;**
2. Zonas de amortiguamiento ambiental;
3. Corredores de conectividad; y,
4. Servidumbres ecológicas.

En la normativa secundaria se establecerá el procedimiento para delimitar las áreas especiales para la conservación de la biodiversidad.

**Art. 57.-** De las obras, proyectos, actividades y régimen de propiedad en las áreas especiales para la conservación de la biodiversidad. La Autoridad Ambiental Nacional establecerá los criterios técnicos para las obras, proyectos o actividades que se realicen en las áreas especiales para la conservación de la biodiversidad.

En las zonas especiales para la conservación y uso sostenible de la biodiversidad no se afectará el derecho de propiedad de las propiedades de dominio público, privado o comunitario.

El aprovechamiento de los recursos naturales en las áreas especiales para la conservación de la biodiversidad deberá considerar los planes de ordenamiento territorial y los modelos de desarrollo.

**Art. 58.- Áreas reconocidas por instrumentos internacionales.** La Autoridad Ambiental Nacional impulsará el establecimiento de áreas especiales de importancia para la conservación de humedales, de las aves, del patrimonio mundial, cultural y natural, entre otras
